# Supplementary material
Source: PubMed Central journal article supplement (PMC7653542)

## Supplemental Online Content

Self WH, Semler MW, Leither LM, et al; National Heart, Lung, and Blood Institute PETAL Clinical Trials Network. Effect of hydroxychloroquine on clinical status at 14 days in hospitalized patients with COVID-19: a randomized clinical trial. *JAMA*. doi:10.1001/jama.2020.22240

**eAppendix.** Writing Committee Members and Collaborators

**eTable 1.** Enrolling Hospital Characteristics

**eTable 2.** ORCHID Trial Eligibility Criteria

**eTable 3.** Protocol Guidance to Prevent Drug-Drug Interactions With the Trial Drug (Hydroxychloroquine)

**eTable 4.** Recommendations for Stopping the Trial

**eTable 5.** Interim Analyses

**eTable 6.** Chronic Comorbidities

**eTable 7.** Medications Prior to Hospital Presentation

**eTable 8.** Physiologic Measurements in the 12 Hours Prior to Randomization

**eTable 9.** Sequential Organ Failure Assessment (SOFA) Prior to Randomization

**eTable 10.** Laboratory Values in the 24 Hours Prior to Randomization

**eTable 11.** Medications Received Between Hospital Presentation and Randomization

**eTable 12.** Receipt of Trial Drug

**eTable 13.** Reasons Trial Drug Not Administered

**eTable 14.** Receipt of Concomitant Medications After Randomization During Hospitalization

**eTable 15.** Receipt of Respiratory Support After Randomization During Hospitalization

**eTable 16.** Sensitivity Analyses for the Primary Outcome

**eTable 17.** Post Hoc Subgroup Analyses of the Primary Outcome

**eTable 18.** COVID Outcomes Scale Over Time by Study Group

**eTable 19.** Additional Clinical Outcomes by Study Group

**eTable 20.** Symptoms of Respiratory Infection by Study Group

**eTable 21.** Laboratory Values Through Day 5 by Study Group

**eTable 22.** Pathogen Testing Data

**eTable 23.** Systematically Collected Safety Events

**eTable 24.** Adverse Events by Organ System

**eFigure.** Subgroup Analyses of the Primary Outcome

This supplemental material has been provided by the authors to give readers additional information about their work.

**eAppendix.** Writing Committee Members and Collaborators

**The National Heart, Lung and Blood Institute (NHLBI) Prevention and Early Treatment of Acute Lung Injury (PETAL) Clinical Trials Network:**

*\*Clinical Center or Clinical Coordinating Center Principal Investigator*

**ALIGN Clinical Center:** Baystate Medical Center –Jay S Steingrub\*, Howard Smithline, Bogdan Tiru, Mark Tidswell, Lori Kozikowski, Sherell Thornton-Thompson, Leslie De Souza; Brigham and Women’s Hospital –Peter C Hou\*, Rebecca M Baron, Anthony F Massaro, Imoigele P Aisiku, Lauren E Fredenburgh, Raghu R Seethala, Lily Johnsky; Maine Medical Center –Richard R Riker, David B Seder, Teresa L May, Michael R Baumann, Ashley Eldridge, Christine Lord

**BOSTON Clinical Center:** Beth Israel Deaconess Medical Center –Nathan I Shapiro\*, Daniel Talmor\*, Thomas O’Mara, Charlotte Kirk, Kelly Harrison, Lisa Kurt, Margaret Schermerhorn, Valerie Banner-Goodspeed, Katherine Boyle, Nicole Dubosh; Massachusetts General Hospital –Michael Filbin, Kathryn Hibbert, Blair Alden Parry, Kendall Lavin-Parsons, Natalie Pulido, Brendan Lilley, Carl Lodenstein, Justin Margolin, Kelsey Brait; University of Mississippi Medical Center – Alan Jones, James Galbraith, Rebekah Peacock, Utsav Nandi, Taylor Wachs

**CALIFORNIA Clinical Center:** UCSF San Francisco –Michael Matthay\*, Kathleen Liu, Kirsten Kangelaris, Ralph Wang, Carolyn Calfee, Kimberly Yee; UCLA– Gregory W Hendey\*, Steven Y Chang, George Lim, Nida Qadir, Andrea Tam, Rebecca Beutler; Stanford University Hospital –Joseph E Levitt, Jenny G Wilson, Angela J Rogers, Rosemary Vojnik, Jonasel Roque; UC Davis – Timothy E Albertson, James A Chenoweth, Jason Y Adams, Skyler J Pearson, Maya M Juarez; UCSF Fresno –Eyad Almasri, Mohamed Fayed, Alyssa Hughes, Shelly Hillard; University of Texas – Ryan Huebinger, Henry Wang, Elizabeth Vidales, Bela Patel

**COLORADO Clinical Center:** University of Colorado Hospital –Adit A Ginde\*, Marc Moss\*, Amiran Baduashvili, Jeffrey McKeehan, Lani Finck, Carrie Higgins, Michelle Howell; Denver Health Medical Center –Ivor Douglas, Jason Haukoos, Terra Hiller,Carolynn Lyle, Alicia Cupelo, Emily Caruso, Claudia Camacho, Stephanie Gravitz; National Jewish Health Saint Joseph’s Hospital–James Finigan, Christine Griesmer

**MICHIGAN Clinical Center:** University of Michigan Medical Center –Pauline K Park\*, Robert Hyzy\*, Kristine Nelson, Kelli McDonough, Norman Olbrich; Indiana University – Mark Williams, Raj Kapoor, Jean Nash, Meghan Willig; Henry Ford – Jayna Gardner-Gray, Mayur Ramesh.

**MONTEFIORE-SINAI Clinical Center:** Montefiore Moses—Michelle Ng Gong\*, Michael Aboodi, Ayesha Asghar, Omowunmi Amosu, Madeline Torres, Savneet Kaur; Montefiore Weiler –Jen-Ting Chen, Aluko Hope, Brenda Lopez, Kathleen Rosales, Jee Young You; University of Arizona— Jarrod M Mosier, Cameron Hypes, Bhupinder Natt, Bryan A Borg, Elizabeth Salvagio Campbell

**OHIO Clinical Center:** University of Cincinnati Medical Center – R. Duncan Hite\*, Kristin Hudock, Autumn Cresie, Faysal Alhasan, Jose Gomez-Arroyo Cleveland Clinic Foundation –Abhijit Duggal, Omar Mehkri, Andrei Hastings, Debasis Sahoo, Francois Abi Fadel, Susan Gole, Valerie Shaner, Allison Wimer, Yvonne Meli, Alexander King; Ohio State University Wexner Medical Center–Thomas E Terndrup\*, Matthew C Exline, Sonal Pannu, Emily Robart, Sarah C Karow

**PACIFIC NORTHWEST Clinical Center:** Harborview Medical Center—Catherine L Hough\*, Bryce RH Robinson\*, Nicholas J Johnson, Daniel J Henning, Monica Campo, Stephanie Gundel, Sakshi Seghal, Sarah Katsandres, Sarah Dean; Oregon Health and Science University—Akram Khan, Olivia Krol, Milad Karami Jouzestani, Peter Huynh

**PITTSBURGH Clinical Center:** UPMC Presbyterian, UPMC Shadyside & UPMC Mercy—Alexandra Weissman, Donald M Yealy\*, Denise Scholl, Peter W Adams, Bryan J McVerry, David Huang, Derek C Angus\*, Penn State Hershey Medical Center—Jordan Schooler, Steven C Moore

**SOUTHEAST Clinical Center:** Wake Forest Baptist Health—D. Clark Files\*, Chadwick Miller\*, Kevin W Gibbs, Mary LaRose, Lori Flores, Lauren Koehler, Caryn G Morse, John Sanders, Caitlyn Langford, Kristen Nanney, Masiku Mdala-Gausi, Phyllis Yeboah; U. Kentucky—Peter E Morris, Jamie Sturgill, Sherif Seif, Evan P Cassity, Sanjay Dhar; Virginia Commonwealth University Medical Center—Marjolein de Wit, Jessica Mason; Medical University of South Carolina—Andrew J Goodwin, Greg Hall, Abbey Grady, Amy Chamberlain

**UTAH:** Intermountain Medical Center—Samuel M Brown\*, Joseph Bledsoe\*, Lindsay M Leither, Ithan Peltan, Nathan Starr, Melissa Fergus, Valerie Aston, Quinn Montgomery, Rilee Smith, Mardee Merrill, Katie Brown, Brent Armbruster; University of Utah Hospital—Estelle Harris, Elizabeth A Middleton, Robert Paine III, Stacy A Johnson, Macy Barrios

**VANDERBILT Clinical Center:** Duke University Medical Center—John Eppensteiner, Alexander T Limkakeng, Lauren McGowan, Tedra Porter, Andrew Bouffler, J. Clancy Leahy; Louisiana State University Health Sciences Center—Bennet deBoisblanc, Matthew Lammi, Kyle Happel, Paula Lauto; Vanderbilt University Medical Center—Wesley H Self\*, Jonathan D Casey, Matthew W Semler, Sean P Collins, Frank Harrell, Christopher J Lindsell, Todd W Rice\*, William B Stubblefield, Christopher S Gray, Jakea Johnson, Megan Roth, Margaret Hays, Donna Torr, Arwa Zakaria

**Clinical Coordinating Center:** Massachusetts General Hospital Biostatistics Center: David A Schoenfeld\*, B. Taylor Thompson\*, Douglas L Hayden, Nancy Ringwood, Cathryn Oldmixon, Christine Ulysse, Richard Morse, Ariela Muzikansky, Laura Fitzgerald, Samuel Whitaker, Adrian Lagakos

**Steering Committee Chair:** Roy G Brower

**National Heart, Lung, and Blood Institute:** Lora Reineck, Neil Aggarwal, Karen Bienstock, Michelle Freemer, Myron Maclawiw, Gail Weinmann

**Protocol Review Committee:** Laurie J Morrison, Mark N Gillespie, Richard J Kryscio, Daniel Brodie, Wojciech Zareba, Anne Rompalo, Michael Boeckh

**Data and Safety Monitoring Board:** Polly E Parsons, Jason D Christie, Jesse R Hall, Nicholas J. Horton, Laurie S Zoloth, Neal W Dickert, Deborah Diercks

**eTable 1.** Enrolling Hospital Characteristics

| Enrolling Hospital<br>(arranged by number<br>of enrollments) | Number of In-patient<br>Hospital Beds | Type of Hospital                                      | Enrolled Participants<br>in the ORCHID trial |
|--------------------------------------------------------------|---------------------------------------|-------------------------------------------------------|----------------------------------------------|
| 1                                                            | 1046                                  | Teaching Hospital Affiliated<br>with a University     | 79                                           |
| 2                                                            | 999                                   | Teaching Hospital Affiliated<br>with a University     | 49                                           |
| 3                                                            | 800                                   | Teaching Hospital Affiliated<br>with a University     | 41                                           |
| 4                                                            | 697                                   | Teaching Hospital Affiliated<br>with a University     | 34                                           |
| 5                                                            | 673                                   | Teaching Hospital Affiliated<br>with a University     | 29                                           |
| 6                                                            | 678                                   | Teaching Hospital Affiliated<br>with a University     | 26                                           |
| 7                                                            | 1300                                  | Teaching Hospital not Affiliated<br>with a University | 24                                           |
| 8                                                            | 500                                   | Teaching Hospital Affiliated<br>with a University     | 24                                           |
| 9                                                            | 716                                   | Teaching Hospital Affiliated<br>with a University     | 21                                           |
| 10                                                           | 413                                   | Teaching Hospital Affiliated<br>with a University     | 18                                           |
| 11                                                           | 678                                   | Teaching Hospital Affiliated<br>with a University     | 13                                           |
| 12                                                           | 555                                   | Teaching Hospital Affiliated<br>with a University     | 11                                           |
| 13                                                           | 555                                   | Teaching Hospital Affiliated<br>with a University     | 10                                           |
| 14                                                           | 777                                   | Teaching Hospital Affiliated<br>with a University     | 9                                            |
| 15                                                           | 1125                                  | Teaching Hospital Affiliated<br>with a University     | 9                                            |
| 16                                                           | 750                                   | Teaching Hospital Affiliated<br>with a University     | 8                                            |
| 17                                                           | 479                                   | Teaching Hospital Affiliated<br>with a University     | 7                                            |
| 18                                                           | 80                                    | Teaching Hospital Affiliated<br>with a University     | 7                                            |
| 19                                                           | 850                                   | Teaching Hospital Affiliated<br>with a University     | 7                                            |
| 20                                                           | 724                                   | Teaching Hospital Affiliated<br>with a University     | 7                                            |
| 21                                                           | 520                                   | Teaching Hospital Affiliated<br>with a University     | 7                                            |
| 22                                                           | 1509                                  | Teaching Hospital Affiliated<br>with a University     | 6                                            |

|    |      |                                                |   |
|----|------|------------------------------------------------|---|
| 23 | 562  | Teaching Hospital Affiliated with a University | 6 |
| 24 | 421  | Teaching Hospital Affiliated with a University | 5 |
| 25 | 660  | Teaching Hospital Affiliated with a University | 4 |
| 26 | 957  | Teaching Hospital Affiliated with a University | 4 |
| 27 | 550  | Teaching Hospital Affiliated with a University | 3 |
| 28 | 637  | Teaching Hospital Affiliated with a University | 3 |
| 29 | 1043 | Teaching Hospital Affiliated with a University | 2 |
| 30 | 613  | Teaching Hospital Affiliated with a University | 2 |
| 31 | 584  | Teaching Hospital Affiliated with a University | 2 |
| 32 | 330  | Teaching Hospital Affiliated with a University | 1 |
| 33 | >750 | Teaching Hospital Affiliated with a University | 1 |
| 34 | >750 | Teaching Hospital Affiliated with a University | 1 |

**eTable 2.** ORCHID Trial Eligibility Criteria  
(final version of the protocol, version 4)

|                                  |                                                                                                                                                                                                                                                                                                                                                                                                                                                                                                                                                                                                                                                                                                                                                                                                                                                                                                                                                                                                                                                                                                                                                                                                                                                                                                                                                                                            |
|----------------------------------|--------------------------------------------------------------------------------------------------------------------------------------------------------------------------------------------------------------------------------------------------------------------------------------------------------------------------------------------------------------------------------------------------------------------------------------------------------------------------------------------------------------------------------------------------------------------------------------------------------------------------------------------------------------------------------------------------------------------------------------------------------------------------------------------------------------------------------------------------------------------------------------------------------------------------------------------------------------------------------------------------------------------------------------------------------------------------------------------------------------------------------------------------------------------------------------------------------------------------------------------------------------------------------------------------------------------------------------------------------------------------------------------|
| <p><b>Inclusion criteria</b></p> | <ol style="list-style-type: none"> <li>1. Age <math>\geq</math>18 years.</li> <li>2. Currently hospitalized or in an emergency department with anticipated hospitalization.</li> <li>3. Symptoms of acute respiratory infection, defined as one or more of the following:             <ol style="list-style-type: none"> <li>a. Cough</li> <li>b. fever (<math>&gt;</math> 37.5° C / 99.5° F)</li> <li>c. shortness of breath (operationalized as any of the following: subjective shortness of breath reported by patient or surrogate; tachypnea with respiratory rate <math>\geq</math>22 /minute; hypoxemia, defined as SpO<sub>2</sub> <math>&lt;</math>92% on room air, new receipt of supplemental oxygen to maintain SpO<sub>2</sub> <math>\geq</math>92%, or increased supplemental oxygen to maintain SpO<sub>2</sub> <math>\geq</math>92% for a patient on chronic oxygen therapy)</li> <li>d. sore throat</li> </ol> </li> <li>4. Laboratory-confirmed SARS-CoV-2 infection within the past 10 days prior to randomization</li> </ol>                                                                                                                                                                                                                                                                                                                                          |
| <p><b>Exclusion criteria</b></p> | <ol style="list-style-type: none"> <li>1. Prisoner</li> <li>2. Pregnancy</li> <li>3. Breast feeding</li> <li>4. Unable to randomize within 10 days after onset of acute respiratory infection symptoms</li> <li>5. Unable to randomize within 48 hours after hospital arrival</li> <li>6. Seizure disorder</li> <li>7. Porphyria cutanea tarda</li> <li>8. QTc <math>&gt;</math>500 ms on electrocardiogram within 72 hours prior to enrollment</li> <li>9. Diagnosis of Long QT syndrome</li> <li>10. Known allergy to hydroxychloroquine, chloroquine, or amodiaquine</li> <li>11. Receipt in the 12 hours prior to enrollment, or planned administration during the 5-day study period that treating clinicians feel cannot be substituted for another medication, of any of the following: amiodarone; cimetidine; dofetilide; phenobarbital; phenytoin; sotalol</li> <li>12. Receipt of <math>&gt;</math>1 dose of hydroxychloroquine or chloroquine in the 10 days prior to enrollment</li> <li>13. Inability to receive enteral medications</li> <li>14. Refusal or inability to be contacted on Day 15 for clinical outcome assessment if discharged prior to Day 15</li> <li>15. Previous enrollment in this trial</li> <li>16. The treating clinical team does not believe equipoise exists regarding the use of hydroxychloroquine for the treatment of this patient</li> </ol> |

|                                                                                       |                                                                                                                                                                                                                                                                                                                                                                                                                                                                                                                                                                                                                                                                                                                                                                                                                                                                                                                                                                                                                                                                                                                                                                                                                                                                                                                                                                                                                                                                                                                                                                             |
|---------------------------------------------------------------------------------------|-----------------------------------------------------------------------------------------------------------------------------------------------------------------------------------------------------------------------------------------------------------------------------------------------------------------------------------------------------------------------------------------------------------------------------------------------------------------------------------------------------------------------------------------------------------------------------------------------------------------------------------------------------------------------------------------------------------------------------------------------------------------------------------------------------------------------------------------------------------------------------------------------------------------------------------------------------------------------------------------------------------------------------------------------------------------------------------------------------------------------------------------------------------------------------------------------------------------------------------------------------------------------------------------------------------------------------------------------------------------------------------------------------------------------------------------------------------------------------------------------------------------------------------------------------------------------------|
| <p><b>Differences in eligibility criteria in earlier versions of the protocol</b></p> | <p><u>Protocol Version 1 (active from trial start (April 2) – April 21, 2020)</u></p> <ol style="list-style-type: none"> <li>1. Inclusion criterion #3: Shortness of breath did not include an operationalized definition, which was later added as the parenthetical phase listed above in inclusion criterion #3.</li> <li>2. Inclusion criterion #4 stated: Laboratory-confirmed SARS-CoV-2 infection within the past 10 days or SARS-CoV-2 laboratory test result pending plus a high clinical suspicion for COVID-19 as indicated by fulfilling all of the following: <ul style="list-style-type: none"> <li>o Cough with duration ≤10 days</li> <li>o Bilateral pulmonary infiltrates on chest imaging (radiograph, computed tomography or ultrasound) or new hypoxemia defined as SpO2 ≤94% on room air</li> <li>o No alternative explanation for symptoms of acute respiratory infection</li> </ul> </li> <li>3. Exclusion criterion #16 did not exist.</li> </ol> <p><u>Protocol Version 2 (active from April 21 – May 28, 2020)</u></p> <ol style="list-style-type: none"> <li>1. Inclusion criterion #3: Shortness of breath did not include an operationalized definition, which was later added as the parenthetical phase listed above in inclusion criterion #3.</li> </ol> <p><u>Protocol Version 3 (active from May 28 – June 12, 2020)</u><br/>Same eligibility criteria as in final protocol (version 4 listed above)</p> <p><u>Protocol Version 4 (active from June 12 – trial end (June 19, 2020))</u><br/>Final protocol (version 4 listed above)</p> |
| <p><b>Summary of eligibility criteria changes</b></p>                                 | <ol style="list-style-type: none"> <li>1. Beginning with protocol version 2, participants were required to have laboratory confirmed SARS-CoV-2 infection rather than laboratory confirmed or clinically suspected SARS-CoV-2 infection.</li> <li>2. Beginning with protocol version 2, an exclusion criterion has added that stated a patient was excluded if: “The treating clinical team does not believe equipoise exists regarding the use of hydroxychloroquine for the treatment of this patient.”</li> <li>3. Beginning with protocol version 3, the definition of shortness of breath was clarified and operationalized.</li> </ol>                                                                                                                                                                                                                                                                                                                                                                                                                                                                                                                                                                                                                                                                                                                                                                                                                                                                                                                                |

**eTable 3.** Protocol Guidance to Prevent Drug-Drug Interactions With the Trial Drug (Hydroxychloroquine)

| <b>Class</b> | <b>Action</b>                                                                                                                                                                                                                                                                                                                                                                                                                                                                                                    | <b>Drugs</b>                                                                                                                        |
|--------------|------------------------------------------------------------------------------------------------------------------------------------------------------------------------------------------------------------------------------------------------------------------------------------------------------------------------------------------------------------------------------------------------------------------------------------------------------------------------------------------------------------------|-------------------------------------------------------------------------------------------------------------------------------------|
| Class A      | Medications considered contraindicated with ORCHID trial drug (hydroxychloroquine). If ordered on an inpatient during the 5-day ORCHID trial drug period, study personnel discussed with treating clinicians whether not administering the drug was appropriate. If this drug was not stopped, trial drug was withheld. Clinicians did not have a choice of continuing the ORCHID trial drug along with this concomitant drug.                                                                                   | amiodarone;<br>chloroquine; cimetidine;<br>dofetilide;<br>phenobarbital;<br>phenytoin; sotalol.                                     |
| Class B      | Medications considered to present a potential interaction with ORCHID trial drug (hydroxychloroquine). If ordered on an inpatient during the 5-day study period, study personnel discussed with treating clinicians the risk-benefit assessment of adding this drug to ORCHID study drug. If this drug was not withheld, ORCHID trial drug could continue after the treating team was alerted to potential drug-drug interactions. Clinicians had the choice of continuing both ORCHID trial drug and this drug. | ampicillin, antacids,<br>cyclosporine, digoxin,<br>flecainide, mefloquine,<br>methotrexate, mexilitine,<br>rifampicin, rifapentine. |



**eTable 4.** Recommendations for Stopping the Trial

Recommendations from the investigators to the DSMB for stopping enrollment in the trial at any of the interim analyses included the following criteria:

- >95% probability of the odds ratio for the primary outcome is >1.0 → stop for efficacy
- >90% probability that the odds ratio for the primary outcome is <1.1 → stop for futility
- >70% probability that the odds ratio for the primary outcome is <0.70 → stop for harm

For calculation of posterior probabilities for tests of efficacy, we used a prior distribution for the odds ratio such that there is an equal chance of harm (OR < 1.0) as for benefit (OR > 1.0) with log(OR) having a normal distribution with mean zero and standard deviation 0.352 (this is a skeptical prior). This skeptical prior assumed a 5% probability of an extremely negative effect (more than halving of the aOR) and a 5% probability of an extremely positive effect (more than doubling the aOR). We used a normal prior distribution for the log odds ratio to achieve that. This estimate was based on extensive discussions among the investigator group, the history of positive trials in pulmonary/critical care, and the reality that a skeptical prior serves primarily to avoid declaring early success on the basis of extreme data that has not yet regressed to the mean. We anticipated that the sample size employed would mean that the data itself would largely overcome the skeptical prior by the second interim analysis.

For tests of futility and harm, we used a non-informative prior.

This table displays the probability of stopping the trial at each planned interim analysis based on the stopping criteria outlined above under two hypothetical scenarios: (1) a true odds ratio of 1.0 [no difference in the primary outcome between the hydroxychloroquine and placebo groups] and (2) a true odds ratio of 1.8 [substantially better primary outcome in the hydroxychloroquine group compared with the placebo group].

| Probabilities of continuing or stopping the trial on or before each planned interim analysis based on a true odds ratio of 1.0 or 1.8. |                       |                   |                   |                       |                   |                   |
|----------------------------------------------------------------------------------------------------------------------------------------|-----------------------|-------------------|-------------------|-----------------------|-------------------|-------------------|
| Planned sample size at analysis                                                                                                        | True Odds Ratio = 1.0 |                   |                   | True Odds Ratio = 1.8 |                   |                   |
|                                                                                                                                        | Continue              | Stop for Efficacy | Stop for Futility | Continue              | Stop for Efficacy | Stop for Futility |
| 102                                                                                                                                    | 0.844                 | 0.006             | 0.150             | 0.840                 | 0.154             | 0.006             |
| 204                                                                                                                                    | 0.744                 | 0.021             | 0.235             | 0.494                 | 0.500             | 0.007             |
| 306                                                                                                                                    | 0.667                 | 0.036             | 0.297             | 0.254                 | 0.740             | 0.007             |
| 408                                                                                                                                    | 0.606                 | 0.0509            | 0.344             | 0.122                 | 0.871             | 0.007             |
| 510                                                                                                                                    | 0.556                 | 0.061             | 0.383             | 0.056                 | 0.937             | 0.007             |

**eTable 5.** Interim Analyses

An independent data and safety monitoring board (DSMB) oversaw the conduct of the trial and reviewed four interim analyses. The date of each interim analysis, number of patients reviewed at each interim analysis, and the outcome of each interim analysis are listed in the table below.

| <b>Interim Analysis Number (date)</b> | <b>Enrolled patients with primary outcome data in dataset, no.</b> | <b>Enrolled patients with baseline data in dataset, no.</b> | <b>DSMB Recommendation</b>                                      |
|---------------------------------------|--------------------------------------------------------------------|-------------------------------------------------------------|-----------------------------------------------------------------|
| #1 (May 19, 2020)                     | 110                                                                | 275                                                         | Continue trial as planned                                       |
| #2 (May 29, 2020)                     | 240                                                                | 348                                                         | Continue trial as planned                                       |
| #3 (June 9, 2020)                     | 306                                                                | 409                                                         | Continue trial as planned                                       |
| #4 (June 19, 2020)                    | 371                                                                | 452                                                         | Stop trial due to very low probability of efficacy <sup>a</sup> |
| Total Enrollment (final dataset)      | 479                                                                | 479 <sup>b</sup>                                            |                                                                 |

a. At the time of the 4<sup>th</sup> interim analysis (n=371 with primary outcome data available at the time), the posterior probability for the aOR being >1.0 was 47% with a skeptical prior, for being <1.1 was 81% with a non-informative prior, and for being <0.70 was 7.8% with a non-informative prior. A post hoc conditional power analysis with these data showed <1.0% probability of reaching the efficacy stopping threshold (defined as >95% probability for an aOR >1.0 with a skeptical prior) if the trial continued to a sample size of 510 participants with each of three different assumptions for the aOR for the remaining participants to be enrolled up to 510: (i) the skeptical prior, (ii) the non-informative prior, and (iii) an aOR set at 1.5.

b. 27 patients were enrolled between preparation of the dataset for the 4<sup>th</sup> interim analysis and cessation of enrollment. Using data from all enrolled patients (n=479), the posterior probability for the aOR being >1.0% was 57% with a skeptical prior, for being <1.1 was 67% with a non-informative prior, and for being <0.70 was 1.5% with a non-informative prior.

**eTable 6.** Chronic Comorbidities  
(baseline characteristics in addition to those listed in Table 1)

| <b>Comorbidity – no. (%)</b>                                   | <b>Hydroxychloroquine<br/>(N=242)</b> | <b>Placebo<br/>(N=237)</b> |
|----------------------------------------------------------------|---------------------------------------|----------------------------|
| Acquired immune deficiency syndrome                            | 1 (0)                                 | 0 (0)                      |
| Leukemia                                                       | 2 (1)                                 | 1 (0)                      |
| Malignant lymphoma                                             | 2 (1)                                 | 1 (0)                      |
| Hemiplegia                                                     | 2 (1)                                 | 0 (0)                      |
| Cerebrovascular disease                                        | 18 (7)                                | 16 (7)                     |
| Prior myocardial infarction                                    | 9 (4)                                 | 12 (5)                     |
| Congestive heart failure                                       | 18 (7)                                | 17 (7)                     |
| Peripheral vascular disease                                    | 11 (5)                                | 8 (3)                      |
| Dementia                                                       | 17 (7)                                | 12 (5)                     |
| Chronic obstructive pulmonary disease                          | 18 (7)                                | 21 (9)                     |
| Asthma                                                         | 26 (11)                               | 23 (10)                    |
| Chronic receipt of supplemental oxygen                         | 10 (4)                                | 9 (4)                      |
| Connective tissue disease                                      | 2 (1)                                 | 0 (0)                      |
| Peptic ulcer disease                                           | 5 (2)                                 | 4 (2)                      |
| Hypertension                                                   | 136 (56)                              | 117 (49)                   |
| Human immunodeficiency virus infection                         | 3 (1)                                 | 5 (2)                      |
| Alcoholism                                                     | 8 (3)                                 | 12 (5)                     |
| Coronary artery disease                                        | 19 (8)                                | 23 (10)                    |
| Rapidly fatal disease                                          | 1 (0)                                 | 1 (0)                      |
| Solid tumor without metastases                                 | 4 (2)                                 | 7 (3)                      |
| Solid tumor with metastasis                                    | 4 (2)                                 | 2 (1)                      |
| Liver disease without portal hypertension or variceal bleeding | 5 (2)                                 | 1 (0)                      |
| Liver disease with portal hypertension or variceal bleeding    | 2 (1)                                 | 2 (1)                      |
| Diabetes mellitus without end-organ damage                     | 73 (30)                               | 66 (28)                    |
| Diabetes mellitus with end-organ damage                        | 15 (6)                                | 12 (5)                     |
| Moderate to severe kidney disease without dialysis*            | 17 (7)                                | 8 (3)                      |
| Kidney disease with dialysis                                   | 11 (5)                                | 6 (3)                      |

| <b>Comorbidity – no. (%)</b> | <b>Hydroxychloroquine<br/>(N=242)</b> | <b>Placebo<br/>(N=237)</b> |
|------------------------------|---------------------------------------|----------------------------|
| Tobacco smoking              |                                       |                            |
| Current                      | 13 (5)                                | 12 (5)                     |
| Former                       | 54 (22)                               | 51 (22)                    |
| Never                        | 172 (71)                              | 172 (73)                   |
| Vaping                       |                                       |                            |
| Current                      | 1 (0)                                 | 0 (0)                      |
| Former                       | 2 (1)                                 | 1 (0)                      |
| Never                        | 236 (98)                              | 234 (99)                   |

\*Moderate to severe kidney disease without dialysis is defined as a plasma creatinine concentration greater than 3 mg/dL, an estimated glomerular filtration rate <15 mL/min/1.73m<sup>2</sup>, or a diagnosis of end-stage renal disease in the electronic health record.

**eTable 7.** Medications Prior to Hospital Presentation  
(baseline characteristics in addition to those listed in Table 1)

| <b>Medication – no. (%)</b>             | <b>Hydroxychloroquine<br/>(N=242)</b> | <b>Placebo<br/>(N=237)</b> |
|-----------------------------------------|---------------------------------------|----------------------------|
| Corticosteroids                         | 25 (10)                               | 22 (9)                     |
| Angiotensin converting enzyme inhibitor | 41 (17)                               | 34 (14)                    |
| Angiotensin receptor blocker            | 19 (8)                                | 22 (9)                     |
| Non-steroidal anti-inflammatory drugs   | 32 (13)                               | 32 (14)                    |

**eTable 8.** Physiologic Measurements in the 12 Hours Prior to Randomization  
(baseline characteristics in addition to those listed in Table 1)

| <b>Physiologic Measure</b>                                 | <b>Hydroxychloroquine<br/>(N=242)</b> | <b>Placebo<br/>(N=237)</b> |
|------------------------------------------------------------|---------------------------------------|----------------------------|
| Highest heart rate, median [IQR], beats per minute         | 93 [81-103]                           | 95 [84-105]                |
| Lowest systolic blood pressure, median [IQR], mmHg         | 111 [99-123]                          | 110 [101-126]              |
| Receipt of vasopressors, no. (%)                           | 8 (3)                                 | 20 (8)                     |
| Highest respiratory rate, median [IQR], breaths per minute | 24 [20-30]                            | 24 [20-30]                 |
| Lowest SpO <sub>2</sub> , median [IQR]                     | 92 [90-95]                            | 92 [90-94]                 |
| Highest FIO <sub>2</sub> , median [IQR]                    | 0.27 [0.21-0.33]                      | 0.27 [0.21-0.36]           |
| Respiratory support, no. (%)                               |                                       |                            |
| Invasive mechanical ventilation                            | 13 (5)                                | 19 (8)                     |
| Noninvasive mechanical ventilation                         | 2 (1)                                 | 5 (2)                      |
| High-flow nasal cannula                                    | 27 (11)                               | 26 (11)                    |
| Face mask                                                  | 5 (2)                                 | 5 (2)                      |
| Standard nasal cannula                                     | 106 (44)                              | 97 (41)                    |
| No supplemental oxygen                                     | 83 (34)                               | 83 (35)                    |
| Other/unspecified                                          | 6 (2)                                 | 2 (1)                      |

**eTable 9.** Sequential Organ Failure Assessment (SOFA) Prior to Randomization (baseline characteristics in addition to those listed in Table 1)

| <b>Measurement</b>                                                                                                 | <b>Hydroxychloroquine<br/>(N=242)</b> | <b>Placebo<br/>(N=237)</b> |
|--------------------------------------------------------------------------------------------------------------------|---------------------------------------|----------------------------|
| Total SOFA Score, median [IQR]                                                                                     | 2 [1-4]                               | 2 [1-4]                    |
| Respiratory SOFA Score, median [IQR]                                                                               | 1 [1-2]                               | 1 [1-2]                    |
| Lowest PaO <sub>2</sub> , median [IQR], mm Hg (number of patients with available values)                           | 62 [58-74] (26)                       | 62 [53-90] (35)            |
| Associated FIO <sub>2</sub> , median [IQR]                                                                         | 0.36 [0.21-0.60]                      | 0.44 [0.30-0.90]           |
| Lowest SpO <sub>2</sub> , median [IQR] (number of patients with available values)                                  | 92 [88-94] (236)                      | 92 [89-94] (234)           |
| Associated FIO <sub>2</sub> , median [IQR]                                                                         | 0.23 [0.21-0.30]                      | 0.24 [0.21-0.33]           |
| Coagulation SOFA Score, median [IQR]                                                                               | 0 [0-0]                               | 0 [0-1]                    |
| Lowest platelet count, median [IQR], thousand cells per mm <sup>3</sup> (number of patients with available values) | 199 [151-247] (237)                   | 201 [147-251] (230)        |
| Liver SOFA Score, median [IQR]                                                                                     | 0 [0-0]                               | 0 [0-0]                    |
| Highest bilirubin, median [IQR], mg/dL (number of patients with available values)                                  | 0.5 [0.4-0.7] (186)                   | 0.5 [0.4-0.7] (193)        |
| Cardiovascular SOFA Score, median [IQR] (number of patients with available values)                                 | 0 [0-0] (225)                         | 0 [0-0] (219)              |
| Receipt of vasopressors, no. (%)                                                                                   | 8 (3)                                 | 20 (8)                     |
| Central Nervous System SOFA Score, median [IQR] (number of patients with available values)                         | 0 [0-0] (241)                         | 0 [0-0] (237)              |
| Lowest Glasgow Coma Scale score, median [IQR] (number of patients with available values)                           | 15 [15-15] (219)                      | 15 [15-15] (202)           |
| Renal SOFA Score, median [IQR]                                                                                     | 0 [0-1]                               | 0 [0-1]                    |
| Highest creatinine, median [IQR], mg/dL (number of patients with available values)                                 | 0.95 [0.75-1.47] (235)                | 0.90 [0.75-1.25] (231)     |

**eTable 10.** Laboratory Values in the 24 Hours Prior to Randomization  
(baseline characteristics in addition to those listed in Table 1)

| <b>Laboratory measurement</b>                                                                                                 | <b>Hydroxychloroquine<br/>(N=242)</b> | <b>Placebo<br/>(N=237)</b> |
|-------------------------------------------------------------------------------------------------------------------------------|---------------------------------------|----------------------------|
| Highest white blood cell count, median [IQR], thousand cells per mm <sup>3</sup> (number of patients with non-missing values) | 6.5 [4.7-8.3] (230)                   | 6.1 [4.5-8.6] (223)        |
| Lowest white blood cell count, median [IQR], thousand cells per mm <sup>3</sup> (number of patients with non-missing values)  | 6.0 [4.3-7.9] (224)                   | 5.9 [4.1-7.7] (218)        |
| Lowest hemoglobin, median [IQR], g/dL (number of patients with non-missing values)                                            | 12.5 [11.4-13.9] (234)                | 13.2 [11.6-14.5] (224)     |
| Highest sodium, median [IQR], mmol/L (number of patients with non-missing values)                                             | 137 [135-139] (235)                   | 137 [135-139] (226)        |
| Lowest sodium, median [IQR], mmol/L (number of patients with non-missing values)                                              | 136 [133-138] (229)                   | 136 [134-138] (221)        |
| Lowest bicarbonate, median [IQR], mmol/L (number of patients with non-missing values)                                         | 23 [20-24] (216)                      | 23 [21-25] (198)           |
| Highest creatinine, median [IQR], mg/dL (number of patients with non-missing values)                                          | 0.95 [0.75-1.47] (235)                | 0.90 [0.75-1.25] (231)     |
| Highest troponin, median [IQR], ng/dL (number of patients with non-missing values)                                            | 0.01 [0.00-0.09] (137)                | 0.01 [0.00-0.16] (136)     |
| Highest aspartate aminotransferase, median [IQR], units/L (number of patients with non-missing values)                        | 39 [29-62] (173)                      | 45 [31-70] (184)           |
| Highest alanine aminotransferase, median [IQR], units/L (number of patients with non-missing values)                          | 30 [18-47] (174)                      | 34 [22-62] (183)           |
| Highest alkaline phosphatase, median [IQR], IU/L (number of patients with non-missing values)                                 | 74 [55-93] (171)                      | 76 [61-102] (176)          |
| Lowest albumin, median [IQR], g/dL (number of patients with non-missing values)                                               | 3.5 [3.2-3.9] (172)                   | 3.6 [3.1-3.9] (174)        |
| Highest partial thromboplastin time, median [IQR], seconds (number of patients with non-missing values)                       | 33.4 [28.4-37.4] (64)                 | 31.8 [27.6-36.0] (69)      |
| Highest international normalized ratio, median [IQR] (number of patients with non-missing values)                             | 1.1 [1.0-1.2] (98)                    | 1.1 [1.0-1.2] (105)        |



**eTable 11.** Medications Received Between Hospital Presentation and Randomization (baseline characteristics in addition to those listed in Table 1)

| <b>Medication, no. (%)</b>                  | <b>Hydroxychloroquine<br/>(N=242)</b> | <b>Placebo<br/>(N=237)</b> |
|---------------------------------------------|---------------------------------------|----------------------------|
| Azithromycin                                | 78 (32)                               | 72 (30)                    |
| Corticosteroids                             | 17 (7)                                | 18 (8)                     |
| Hydroxychloroquine <sup>a</sup>             | 3 (1)                                 | 1 (0)                      |
| Chloroquine*                                | 0 (0)                                 | 1 (0)                      |
| Interferon beta                             | 1 (0)                                 | 0 (0)                      |
| Remdesivir                                  | 12 (5)                                | 12 (5)                     |
| Tocilizumab                                 | 1 (0)                                 | 4 (2)                      |
| SARS-CoV-2 convalescent plasma <sup>b</sup> | 5/229 (2)                             | 7/227 (3)                  |

a. Patients who received one dose of hydroxychloroquine or chloroquine as part of routine clinical care were eligible for enrollment. Patients who received more than one dose of hydroxychloroquine or chloroquine as part of routine clinical care in the 10 days prior to randomization were not eligible.

b. Data collection of SARS-CoV-2 convalescent plasma did not begin immediately at trial launch; 23 patients did not have data on use of SARS-CoV-2 convalescent plasma collected.

**eTable 12.** Receipt of Trial Drug

| <b>Population/Characteristic</b>                          | <b>Hydroxychloroquine</b> | <b>Placebo</b> |
|-----------------------------------------------------------|---------------------------|----------------|
| <b>All enrolled patients</b>                              | <b>n = 242</b>            | <b>n = 237</b> |
| Total doses of trial drug received, median [IQR]          | 10 [9-10]                 | 10 [9-10]      |
| Received $\geq$ 1 dose of trial drug – no. (%)            | 242 (100)                 | 231 (97)       |
| Received 10 doses of trial drug – no. (%)                 | 168 (69)                  | 175 (74)       |
| <b>Enrolled patients who survived through Study Day 5</b> | <b>n = 240</b>            | <b>n = 235</b> |
| Total doses of trial drug received, median [IQR]          | 10 [9-10]                 | 10 [9-10]      |
| Received $\geq$ 1 dose of trial drug – no. (%)            | 240 (100)                 | 229 (97)       |
| Received 10 doses of trial drug – no. (%)                 | 168 (70)                  | 175 (74)       |

**eTable 13.** Reasons Trial Drug Not Administered

| <b>Characteristics</b>                                                                            | <b>Hydroxychloroquine</b> | <b>Placebo</b> |
|---------------------------------------------------------------------------------------------------|---------------------------|----------------|
| Total potential doses of trial drug (no. of patients x 10), count                                 | 2420                      | 2370           |
| Doses of trial drug administered, count (% of total potential doses)                              | 2149 (89)                 | 2038 (86)      |
| Doses of trial drug not administered, count (% of total potential doses)                          | 271 (11)                  | 332 (14)       |
| Reason dose of trial drug was not administered, count (% of doses of trial drug not administered) |                           |                |
| Patient died before scheduled dose                                                                | 11 (4)                    | 8 (2)          |
| On-study monitoring with QTc > 500ms                                                              | 38 (14)                   | 21 (6)         |
| On-study monitoring with drug-drug interaction                                                    | 6 (2)                     | 21 (6)         |
| Dose held by clinical team                                                                        | 15 (6)                    | 13 (4)         |
| Study drug unavailable                                                                            | 2 (1)                     | 3 (1)          |
| Negative SARS-CoV-2 test and alternative cause of clinical syndrome                               | 0 (0)                     | 9 (3)          |
| Patient declined dose                                                                             | 90 (33)                   | 104 (31)       |
| Unable to be logistically administered during the scheduled window                                | 26 (10)                   | 36 (11)        |
| Adverse event                                                                                     | 12 (4)                    | 22 (7)         |
| Other                                                                                             | 71 (26)                   | 95 (29)        |

**eTable 14.** Receipt of Concomitant Medications After Randomization During Hospitalization

| <b>Class / Medication</b>               | <b>Hydroxychloroquine<br/>(N=242)</b> | <b>Placebo<br/>(N=237)</b> |
|-----------------------------------------|---------------------------------------|----------------------------|
| Antiviral                               |                                       |                            |
| Open-label hydroxychloroquine, no. (%)  | 4 (2)                                 | 1 (0)                      |
| Remdesivir, no. (%)                     | 56 (23)                               | 48 (20)                    |
| Other antiviral, no. (%)                | 6 (2)                                 | 7 (3)                      |
| Immunomodulator                         |                                       |                            |
| Corticosteroids, no. (%)                | 39 (16)                               | 49 (21)                    |
| Tocilizumab, no. (%)                    | 10 (4)                                | 17 (7)                     |
| Other immunomodulator, no. (%)          | 1 (0)                                 | 3 (1)                      |
| Antibacterial                           |                                       |                            |
| Azithromycin, no. (%)                   | 47 (19)                               | 44 (19)                    |
| SARS-CoV-2 convalescent plasma, no. (%) | 19 (8)                                | 25 (11)                    |

**eTable 15.** Receipt of Respiratory Support After Randomization During Hospitalization

| <b>Respiratory Support<sup>a</sup></b>        | <b>Hydroxychloroquine<br/>(N=242)</b> | <b>Placebo<br/>(N=237)</b> |
|-----------------------------------------------|---------------------------------------|----------------------------|
| High-flow nasal cannula, no. (%)              | 58 (24)                               | 65 (27)                    |
| Non-invasive ventilation, no. (%)             | 19 (8)                                | 26 (11)                    |
| Invasive mechanical ventilation, no. (%)      | 41 (17)                               | 47 (20)                    |
| Extra-corporeal membrane oxygenation, no. (%) | 6 (2)                                 | 5 (2)                      |

a. Categories are not mutually exclusive

**eTable 16.** Sensitivity Analyses for the Primary Outcome

| <b>Population / Outcome</b>                                                                              | <b>Hydroxychloroquine<br/>(n=242 randomized)</b> | <b>Placebo<br/>(n=237 randomized)</b> | <b>Adjusted odds<br/>ratio (95% CI)<sup>a</sup></b> |
|----------------------------------------------------------------------------------------------------------|--------------------------------------------------|---------------------------------------|-----------------------------------------------------|
| Population limited to laboratory-confirmed SARS-CoV-2 infection                                          | n=242                                            | n=235                                 |                                                     |
| Score on COVID Outcomes Scale at 14 days, median [IQR]                                                   | 6 [4-7]                                          | 6 [4-7]                               | 1.04 (0.75-1.45)                                    |
| Population limited to patients with $\geq 1$ dose of trial drug (modified intention to treat population) | n=242                                            | n=231                                 |                                                     |
| Score on COVID Outcomes Scale at 14 days, median [IQR]                                                   | 6 [4-7]                                          | 6 [4-7]                               | 1.03 (0.74-1.44)                                    |
| Full trial population with enrolling site included in the model as a random effect (post-hoc analysis)   | n=242                                            | n=237                                 |                                                     |
| Score on COVID Outcomes Scale at 14 days, median [IQR]                                                   | 6 [4-7]                                          | 6 [4-7]                               | 1.01 (0.73-1.40)                                    |

a. Proportional odds model with study group as the independent variable, COVID Outcomes Scale scores as the dependent variable, and the following co-variables: age, sex, baseline COVID Outcome Scale category, baseline Sequential Organ Failure Assessment (SOFA) score, and duration of acute respiratory infection symptoms prior to randomization.

**eTable 17.** Post Hoc Subgroup Analyses of the Primary Outcome  
The primary outcome is the COVID Outcomes Scale at 14 days after randomization.

| <b>Population / Outcome</b>                                                  | <b>Hydroxychloroquine<br/>(N=242 randomized)</b> | <b>Placebo<br/>(N=237 randomized)</b> | <b>Primary outcome<br/>adjusted odds<br/>ratio<sup>a</sup> (95% CI)</b> |
|------------------------------------------------------------------------------|--------------------------------------------------|---------------------------------------|-------------------------------------------------------------------------|
| Open label clinical remdesivir use at any time during hospitalization        | n=56                                             | n=48                                  | 1.01 (0.49-2.07)                                                        |
| No open label clinical remdesivir use at any time during hospitalization     | n=186                                            | n=189                                 | 1.03 (0.71-1.51)                                                        |
| Open label azithromycin use at any time during hospitalization               | n=47                                             | n=44                                  | 0.80 (0.37-1.74)                                                        |
| No open label azithromycin use at any time during hospitalization            | n=195                                            | n=193                                 | 1.05 (0.73-1.52)                                                        |
| Open label corticosteroid use at any time during hospitalization             | n=39                                             | n=49                                  | 0.94 (0.44-2.02)                                                        |
| No open label clinical corticosteroid use at any time during hospitalization | n=203                                            | n=188                                 | 1.05 (0.73-1.53)                                                        |

a. Adjusted odds ratios were calculated with proportional odds models with study group as the independent variable, COVID Outcomes Scale at 14 days as the dependent variable, and the following co-variables: age, sex, baseline COVID Outcome Scale category, baseline Sequential Organ Failure Assessment (SOFA) score, and duration of acute respiratory infection symptoms prior to randomization.

**eTable 18.** COVID Outcomes Scale Over Time by Study Group

| <i>Days after randomization/ COVID Outcomes Scale</i>                                            | <b>Hydroxychloroquine<br/>(N=242)</b> | <b>Placebo<br/>(N=237)</b> | <b>Adjusted odds<br/>ratio* (95% CI)</b> |
|--------------------------------------------------------------------------------------------------|---------------------------------------|----------------------------|------------------------------------------|
| <i>At Randomization</i>                                                                          |                                       |                            | 1.04 (0.72-1.49)                         |
| COVID Outcomes Scale Category – no. (%)                                                          |                                       |                            |                                          |
| 2 – Hospitalized, receiving ECMO or invasive mechanical ventilation                              | 13 (5)                                | 19 (8)                     |                                          |
| 3 – Hospitalized, receiving noninvasive mechanical ventilation or nasal high-flow oxygen therapy | 28 (12)                               | 27 (11)                    |                                          |
| 4 – Hospitalized, receiving supplemental oxygen                                                  | 116 (48)                              | 108 (46)                   |                                          |
| 5 – Hospitalized, not receiving supplemental oxygen                                              | 85 (35)                               | 83 (35)                    |                                          |
| <i>At 2 days after randomization (Study Day 3)</i>                                               |                                       |                            | 1.28 (0.90-1.81)                         |
| COVID Outcomes Scale Category – no. (%)                                                          |                                       |                            |                                          |
| 1 – Death                                                                                        | 1 (0)                                 | 0 (0)                      |                                          |
| 2 – Hospitalized, receiving ECMO or invasive mechanical ventilation                              | 22 (9)                                | 30 (13)                    |                                          |
| 3 – Hospitalized, receiving noninvasive mechanical ventilation or nasal high-flow oxygen therapy | 38 (16)                               | 35 (15)                    |                                          |
| 4 – Hospitalized, receiving supplemental oxygen                                                  | 93 (38)                               | 96 (41)                    |                                          |
| 5 – Hospitalized, not receiving supplemental oxygen                                              | 57 (24)                               | 56 (24)                    |                                          |
| 6 – Not hospitalized, and unable to perform normal activities                                    | 31 (13)                               | 20 (8)                     |                                          |
| <i>At 7 days after randomization (Study Day 8)</i>                                               |                                       |                            | 1.16 (0.84-1.61)                         |
| COVID Outcomes Scale Category – no. (%)                                                          |                                       |                            |                                          |
| 1 – Death                                                                                        | 9 (4)                                 | 9 (4)                      |                                          |
| 2 – Hospitalized, receiving ECMO or invasive mechanical ventilation                              | 27 (11)                               | 33 (14)                    |                                          |
| 3 – Hospitalized, receiving noninvasive mechanical ventilation or nasal high-flow oxygen therapy | 15 (6)                                | 20 (8)                     |                                          |
| 4 – Hospitalized, receiving supplemental oxygen                                                  | 41 (17)                               | 30 (13)                    |                                          |
| 5 – Hospitalized, not receiving supplemental oxygen                                              | 29 (12)                               | 24 (10)                    |                                          |
| 6 – Not hospitalized, and unable to perform normal activities                                    | 56 (23)                               | 73 (31)                    |                                          |
| 7 – Not hospitalized, and able to perform normal activities                                      | 65 (27)                               | 48 (20)                    |                                          |



| <b>Days after randomization/ COVID Outcomes Scale</b>                                            | <b>Hydroxychloroquine<br/>(N=242)</b> | <b>Placebo<br/>(N=237)</b> | <b>Adjusted odds<br/>ratio* (95% CI)</b> |
|--------------------------------------------------------------------------------------------------|---------------------------------------|----------------------------|------------------------------------------|
| <i>At 14 days after randomization (Study Day 15)<br/>[primary outcome]</i>                       |                                       |                            | 1.02 (0.73-1.42)                         |
| COVID Outcomes Scale Category – no. (%)                                                          |                                       |                            |                                          |
| 1 – Death                                                                                        | 18 (7)                                | 14 (6)                     |                                          |
| 2 – Hospitalized, receiving ECMO or invasive mechanical ventilation                              | 18 (7)                                | 24 (10)                    |                                          |
| 3 – Hospitalized, receiving noninvasive mechanical ventilation or nasal high-flow oxygen therapy | 5 (2)                                 | 7 (3)                      |                                          |
| 4 – Hospitalized, receiving supplemental oxygen                                                  | 22 (9)                                | 18 (8)                     |                                          |
| 5 – Hospitalized, not receiving supplemental oxygen                                              | 21 (9)                                | 16 (7)                     |                                          |
| 6 – Not hospitalized, and unable to perform normal activities                                    | 80 (33)                               | 89 (38)                    |                                          |
| 7 – Not hospitalized, and able to perform normal activities                                      | 78 (32)                               | 69 (29)                    |                                          |
| <i>At 28 days after randomization (Study Day 29)</i>                                             |                                       |                            | 0.97 (0.69-1.38)                         |
| COVID Outcomes Scale Category – no. (%)                                                          |                                       |                            |                                          |
| 1 – Death                                                                                        | 25 (10)                               | 25 (11)                    |                                          |
| 2 – Hospitalized, receiving ECMO or invasive mechanical ventilation                              | 11 (5)                                | 12 (5)                     |                                          |
| 4 – Hospitalized, receiving supplemental oxygen                                                  | 9 (4)                                 | 10 (4)                     |                                          |
| 5 – Hospitalized, not receiving supplemental oxygen                                              | 6 (2)                                 | 5 (2)                      |                                          |
| 6 – Not hospitalized, and unable to perform normal activities                                    | 75 (31)                               | 72 (30)                    |                                          |
| 7 – Not hospitalized, and able to perform normal activities                                      | 116 (48)                              | 113 (48)                   |                                          |

\*Proportional odds model with study group as the independent variable, COVID Outcomes Scale scores as the dependent variable, and the following co-variables: age, sex, baseline COVID Outcome Scale category, baseline Sequential Organ Failure Assessment (SOFA) score, and duration of acute respiratory infection symptoms prior to randomization. Baseline COVID Outcomes Scales score was not used as a co-variable in the model to calculate the adjusted odds ratio for the baseline (at randomization) time point.

**eTable 19.** Additional Clinical Outcomes by Study Group

| <b>Outcome</b>                                                                                                   | <b>Hydroxychloroquine<br/>(N=242)</b> | <b>Placebo<br/>(N=237)</b> |
|------------------------------------------------------------------------------------------------------------------|---------------------------------------|----------------------------|
| Total SOFA Score, median [IQR]                                                                                   |                                       |                            |
| At randomization                                                                                                 | 2 [1-4]                               | 2 [1-4]                    |
| 2 days after randomization (Study Day 3)                                                                         | 2 [1-5]                               | 2 [1-4]                    |
| Respiratory SOFA Score, median [IQR]                                                                             |                                       |                            |
| At randomization                                                                                                 | 1 [1-2]                               | 1 [1-2]                    |
| 2 days after randomization (Study Day 3)                                                                         | 1 [1-2]                               | 1 [1-2]                    |
| Coagulation SOFA Score, median [IQR]                                                                             |                                       |                            |
| At randomization                                                                                                 | 0 [0-0]                               | 0 [0-1]                    |
| 2 days after randomization (Study Day 3)                                                                         | 0 [0-0]                               | 0 [0-0]                    |
| Liver SOFA Score, median [IQR]                                                                                   |                                       |                            |
| At randomization                                                                                                 | 0 [0-0]                               | 0 [0-0]                    |
| 2 days after randomization (Study Day 3)                                                                         | 0 [0-0]                               | 0 [0-0]                    |
| Cardiovascular SOFA Score, median [IQR] (patients with available values)                                         |                                       |                            |
| At randomization                                                                                                 | 0 [0-0] (225)                         | 0 [0-0] (219)              |
| 2 days after randomization (Study Day 3)                                                                         | 0 [0-1] (201)                         | 0 [0-1] (208)              |
| Central Nervous System SOFA Score, median [IQR] (patients with available values)                                 |                                       |                            |
| At randomization                                                                                                 | 0 [0-0] (241)                         | 0 [0-0] (237)              |
| 2 days after randomization (Study Day 3)                                                                         | 0 [0-1] (180)                         | 0 [0-1] (182)              |
| Renal SOFA Score, median [IQR] (patients with available values)                                                  |                                       |                            |
| At randomization                                                                                                 | 0 [0-1]                               | 0 [0-1]                    |
| 2 days after randomization (Study Day 3)                                                                         | 0 [0-2] (196)                         | 0 [0-1] (184)              |
| Readmitted between hospital discharge and 28 days, no (%)                                                        | 17/201 (8)                            | 13/196 (7)                 |
| Emergency department visit between discharge from index hospitalization and 28 days, no (%)                      | 26/201 (13)                           | 21/196 (11)                |
| Diagnosed with a deep vein thrombosis between randomization and earlier of hospital discharge or 28 days, no (%) | 6 (2)                                 | 10 (4)                     |
| Diagnosed with a pulmonary embolism between randomization and earlier of hospital discharge or 28 days, no (%)   | 4 (2)                                 | 5 (2)                      |

**eTable 20.** Symptoms of Respiratory Infection by Study Group

| <b>Follow-up time / Symptom*</b>                                            | <b>Hydroxychloroquine<br/>(N=242)</b> | <b>Placebo<br/>(N=237)</b> |
|-----------------------------------------------------------------------------|---------------------------------------|----------------------------|
| 14 Days after Randomization (Study Day 15)                                  |                                       |                            |
| Cough, no (%)                                                               | 34 (14)                               | 34 (14)                    |
| Fever (T >99.5F measured), no (%)                                           | 2 (1)                                 | 1 (0)                      |
| Feverishness (subjective symptom), no (%)                                   | 4 (2)                                 | 3 (1)                      |
| Shortness of breath, no (%)                                                 | 32 (13)                               | 35 (15)                    |
| Chest tightness, no (%)                                                     | 9 (4)                                 | 6 (3)                      |
| Sore throat, no (%)                                                         | 0 (0)                                 | 4 (2)                      |
| Weakness or fatigue, no (%)                                                 | 44 (18)                               | 38 (16)                    |
| Other, no (%)                                                               | 21 (9)                                | 21 (9)                     |
| Any symptom attributed to COVID-19<br>(composite of above symptoms), no (%) | 84 (35)                               | 78 (33)                    |
| 28 Days after Randomization (Study Day 29)                                  |                                       |                            |
| Cough, no (%)                                                               | 25 (10)                               | 23 (10)                    |
| Fever (T >99.5F measured), no (%)                                           | 1 (0)                                 | 2 (1)                      |
| Feverishness (subjective symptom), no (%)                                   | 1 (0)                                 | 2 (1)                      |
| Shortness of breath, no (%)                                                 | 24 (10)                               | 25 (11)                    |
| Chest tightness, no (%)                                                     | 4 (2)                                 | 6 (3)                      |
| Sore throat, no (%)                                                         | 3 (1)                                 | 3 (1)                      |
| Weakness or fatigue, no (%)                                                 | 33 (14)                               | 28 (12)                    |
| Other, no (%)                                                               | 19 (8)                                | 31 (13)                    |
| Any symptom attributed to COVID-19<br>(composite of above symptoms), no (%) | 69 (29)                               | 72 (30)                    |

**eTable 21.** Laboratory Values Through Day 5 by Study Group

| Laboratory value, median [IQR] (number of patients with available data) | Hydroxychloroquine (N=242) | Placebo (N=237)        |
|-------------------------------------------------------------------------|----------------------------|------------------------|
| White blood cell count, thousand per mm <sup>3</sup>                    |                            |                        |
| At randomization (lowest in prior 24 hours)                             | 6.0 [4.3-7.9] (224)        | 5.9 [4.1-7.7] (218)    |
| Lowest through Day 5                                                    | 4.9 [3.5-6.6] (234)        | 5.0 [3.6-6.5] (233)    |
| Highest through Day 5                                                   | 7.9 [5.7-10.2] (238)       | 7.8 [5.9-10.8] (235)   |
| Hemoglobin, g/dL                                                        |                            |                        |
| At randomization (lowest in prior 24 hours)                             | 12.5 [11.4-13.9] (234)     | 13.2 [11.6-14.5] (224) |
| Lowest through Day 5                                                    | 11.7 [10.4-13.1] (242)     | 12.1 [10.4-13.6] (236) |
| Platelet count, thousand per mm <sup>3</sup>                            |                            |                        |
| At randomization (lowest in prior 24 hours)                             | 199 [151-247] (237)        | 201 [147-251] (230)    |
| Lowest through Day 5                                                    | 210 [163-265] (212)        | 211 [144-279] (211)    |
| Sodium, mmol/L                                                          |                            |                        |
| At randomization (lowest in prior 24 hours)                             | 137 [135-139] (235)        | 137 [135-139] (226)    |
| Lowest through Day 5                                                    | 135 [133-137] (238)        | 135 [132-137] (233)    |
| Highest through Day 5                                                   | 139 [138-140] (242)        | 139 [137-142] (236)    |
| Potassium, mmol/L                                                       |                            |                        |
| At randomization (lowest in prior 24 hours)                             | 3.8 [3.6-4.2] (228)        | 3.8 [3.5-4.2] (221)    |
| Lowest through Day 5                                                    | 3.7 [3.4-3.9] (237)        | 3.6 [3.4-3.9] (233)    |
| Highest through Day 5                                                   | 4.30 [4.0-4.7] 241         | 4.30 [4.0-4.7] 236     |
| Chloride, mmol/L                                                        |                            |                        |
| At randomization (highest in prior 24 hours)                            | 102 [98-106] (235)         | 102 [98-105] (227)     |
| Highest through Day 5                                                   | 105 [102-107] (242)        | 104 [101-108] (236)    |
| Bicarbonate, mmol/L                                                     |                            |                        |
| At randomization (lowest in prior 24 hours)                             | 23 [200-24] (216)          | 23 [21-25] (198)       |
| Lowest through Day 5                                                    | 21 [19-23] (228)           | 22 [20-24] (221)       |
| Highest through Day 5                                                   | 25 [23-28] (232)           | 26 [24-29] (224)       |
| Blood urea nitrogen, mg/dL                                              |                            |                        |
| At randomization (highest in the prior 24 hours)                        | 14 [11-26] (235)           | 14 [10-24] (224)       |
| Creatinine, mg/dL                                                       |                            |                        |
| At randomization (highest)                                              | 0.95 [0.75-1.47] (235)     | 0.90 [0.75-1.25] (231) |
| Highest through Day 5                                                   | 0.89 [0.70-1.40] (218)     | 0.90 [0.71-1.30] (216) |

| <b>Laboratory value, median [IQR] (number of patients with available data)</b> | <b>Hydroxychloroquine (N=242)</b> | <b>Placebo (N=237)</b> |
|--------------------------------------------------------------------------------|-----------------------------------|------------------------|
| Troponin, ng/dL                                                                |                                   |                        |
| At randomization (highest in prior 24 hours)                                   | 0.01 [0.00-0.09] (137)            | 0.01 [0.00-0.16] (136) |
| Highest through Day 5                                                          | 0.01 [0.00-0.20] (148)            | 0.01 [0.00-0.37] (151) |
| Aspartate aminotransferase (AST), units/L                                      |                                   |                        |
| At randomization (highest in prior 24 hours)                                   | 39 [29-62] (173)                  | 45 [31-70] (184)       |
| Highest through Day 5                                                          | 45 [31-78] (213)                  | 53 [38-88] (219)       |
| Alanine aminotransferase (ALT), units/L                                        |                                   |                        |
| At randomization (highest in prior 24 hours)                                   | 30 [18-47] (174)                  | 34 [22-62] (183)       |
| Highest through Day 5                                                          | 33 [20-63] (214)                  | 42 [24-73] (218)       |
| Total bilirubin, mg/dL                                                         |                                   |                        |
| At randomization (highest in prior 24 hours)                                   | 0.5 [0.4-0.7] (186)               | 0.5 [0.4-0.7] (193)    |
| Highest through Day 5                                                          | 0.5 [0.4-0.7] (160)               | 0.6 [0.4-0.8] (170)    |
| Albumin, g/dL                                                                  |                                   |                        |
| At randomization (lowest in prior 24 hours)                                    | 3.5 [3.2-3.9] (172)               | 3.6 [3.1-3.9] (174)    |
| Lowest through Day 5                                                           | 3.2 [2.7-3.5] (211)               | 3.1 [2.8-3.5] (209)    |
| Partial thromboplastin time (PTT), seconds                                     |                                   |                        |
| At randomization (highest in prior 24 hours)                                   | 33.4 [28.4-37.4] (64)             | 31.8 [27.6-36.0] (69)  |
| Highest through Day 5                                                          | 34.6 [29.1-39.8] (95)             | 33.6 [28.8-39.8] (104) |
| International normalized ratio (INR)                                           |                                   |                        |
| At randomization (highest in prior 24 hours)                                   | 1.1 [1.0-1.2] (98)                | 1.1 [1.0-1.2] (105)    |
| Highest through Day 5                                                          | 1.2 [1.1-1.4] (75)                | 1.2 [1.1-1.3] (85)     |

**eTable 22.** Pathogen Testing Data

| <b>Pathogen testing</b>                                                                                                                            | <b>Hydroxychloroquine<br/>(n=242)</b> | <b>Placebo<br/>(n=237)</b> |
|----------------------------------------------------------------------------------------------------------------------------------------------------|---------------------------------------|----------------------------|
| SARS-CoV-2 polymerase chain reaction: $\geq 1$ positive test for SARS-CoV-2 detection, no. (%)                                                     | 242 (100)                             | 235 (99)                   |
| Source of specimen(s) positive for SARS-CoV-2 detection, no. [not mutually exclusive]                                                              |                                       |                            |
| Nasopharyngeal                                                                                                                                     | 232                                   | 227                        |
| Oral                                                                                                                                               | 4                                     | 3                          |
| Tracheal aspirate                                                                                                                                  | 4                                     | 6                          |
| Sputum                                                                                                                                             | 1                                     | 1                          |
| Bronchoalveolar lavage                                                                                                                             | 1                                     | 0                          |
| Other                                                                                                                                              | 5                                     | 4                          |
| Blood cultures: $\geq 1$ blood culture positive between hospital presentation and Study Day 7, no. (%)                                             | 16 (7)                                | 17 (7)                     |
| Pathogen in positive blood culture, no. [not mutually exclusive]                                                                                   |                                       |                            |
| Staphylococcus aureus                                                                                                                              | 4                                     | 5                          |
| Enterococcus                                                                                                                                       | 2                                     | 0                          |
| Streptococcus pneumoniae                                                                                                                           | 0                                     | 2                          |
| Pseudomonas aeruginosa                                                                                                                             | 1                                     | 0                          |
| Coagulase negative staphylococcus                                                                                                                  | 1                                     | 3                          |
| Bacillus                                                                                                                                           | 0                                     | 1                          |
| Other                                                                                                                                              | 9                                     | 7                          |
| Viral pathogens: $\geq 1$ virus detected by polymerase chain reaction other than SARS-CoV-2 between hospital presentation and Study Day 7, no. (%) | 0                                     | 1 (<1%)                    |
| Other viral pathogens detected, no.                                                                                                                |                                       |                            |
| Influenza B                                                                                                                                        | 0                                     | 1                          |

**eTable 23.** Systematically Collected Safety Events  
(assessed between randomization and 28 days later)

| <b>Outcome – no. (%)</b>                            | <b>Hydroxychloroquine<br/>(n=242)</b> | <b>Placebo<br/>(n=237)</b> | <b>Odds ratio<br/>(95% CI)</b> |
|-----------------------------------------------------|---------------------------------------|----------------------------|--------------------------------|
| Seizure                                             | 1 (<1)                                | 0                          | n/a                            |
| Atrial tachyarrhythmia                              | 15 (6)                                | 11 (5)                     | 1.36 (0.61-3.02)               |
| Ventricular tachyarrhythmia                         | 5 (2)                                 | 6 (3)                      | 0.81 (0.24-2.70)               |
| Cardiac arrest treated with CPR                     | 10 (4)                                | 4 (2)                      | 2.51 (0.78-8.12)               |
| AST or ALT greater than twice upper limit of normal | 50 (21)                               | 65 (27)                    | 0.69 (0.45-1.05)               |
| Acute pancreatitis                                  | 5 (2)                                 | 6 (3)                      | 0.81 (0.24-2.70)               |
| Stage II or greater acute kidney injury             | 37 (15)                               | 37 (16)                    | 0.97 (0.59-1.59)               |
| Receipt of renal replacement therapy                | 10 (4)                                | 14 (6)                     | 0.69 (0.30-1.58)               |
| Symptomatic hypoglycemia                            | 10 (4)                                | 8 (3)                      | 1.23 (0.48-3.18)               |
| Neutrophil count < 1000 cells/mm <sup>3</sup>       | 4 (2)                                 | 4 (2)                      | 0.98 (0.24-3.96)               |
| Lymphocyte count < 1000 cells/mm <sup>3</sup>       | 92 (38)                               | 87 (37)                    | 1.06 (0.73-1.53)               |
| Hemoglobin < 12 g/dL                                | 139 (57)                              | 120 (51)                   | 1.32 (0.92-1.89)               |
| Platelet count < 50 cells/mm <sup>3</sup>           | 4 (2)                                 | 5 (2)                      | 0.78 (0.21-2.94)               |
| Severe dermatologic reaction                        | 1 (<1)                                | 1 (<1)                     | 0.98 (0.06-15.74)              |

Abbreviations: AST = aspartate aminotransferase; ALT = alanine aminotransferase; CPR = cardiopulmonary resuscitation

**eTable 24. Adverse Events by Organ System**

Adverse events (AEs) were reported by site investigators, who were blinded to randomized group, to the Clinical Coordinating Center. The site investigator who reported each adverse event classified the adverse event as serious or not serious and the relatedness to study procedures. Individual patients could experience more than one adverse event.

A total of 89 adverse events were reported in the trial. In the hydroxychloroquine group, 50 adverse events among 44 patients were reported. In the placebo group, 39 adverse events among 32 patients were reported.

A serious adverse event (SAE) was defined as an adverse event leading to death, a life-threatening experience, prolongation of hospitalization, or persistent or significant disability or incapacity. A total of 30 serious adverse events were reported in the trial. In the hydroxychloroquine group, 18 serious adverse among 14 patients were reported. In the placebo group, 12 serious adverse events among 11 patients were reported.

Site investigators reported the suspected relatedness of each adverse event to study procedures using the following 5 options: definitely related; probably or possibly related; probably not related; definitely not related; uncertain relationship. All serious adverse events were classified as probably not related or definitely not related.

This table, which begins on the next page, displays all 89 adverse events reported in the trial, whether the adverse event was classified as serious, and the relatedness of the adverse event to study procedures.



| Organ System                         | Adverse Event                      | SAE?                 | Relatedness of AE to study procedures | Hydroxychloroquine AEs reported, no. | Placebo AEs reported, no. |
|--------------------------------------|------------------------------------|----------------------|---------------------------------------|--------------------------------------|---------------------------|
| Blood and lymphatic system disorders | Leukocytosis                       | No                   | Definitely not related                | 1                                    | 0                         |
| Cardiac disorders                    | Atrial Arrhythmia                  | No                   | Probably or possibly related          | 1                                    | 2                         |
|                                      | Bradycardia                        | No                   | Probably or possibly related          | 0                                    | 2                         |
|                                      | Cardiac Arrest                     | Yes                  | Probably not related                  | 0                                    | 1                         |
|                                      |                                    | Yes                  | Definitely not related                | 0                                    | 1                         |
|                                      | Cardiac Arrhythmia                 | No                   | Probably or possibly related          | 0                                    | 1                         |
|                                      | Cardiomyopathy                     | No                   | Definitely not related                | 1                                    | 0                         |
|                                      | Chest Pain                         | No                   | Probably or possibly related          | 2                                    | 0                         |
|                                      | Conduction Disorder                | No                   | Probably or possibly related          | 0                                    | 1                         |
|                                      | EKG Abnormality: Non-Specific      | No                   | Probably or possibly related          | 0                                    | 1                         |
|                                      | Myocardial Infarction              | Yes                  | Definitely not related                | 1                                    | 0                         |
|                                      | Premature Ventricular Contractions | No                   | Probably or possibly related          | 1                                    | 1                         |
|                                      | Prolonged QTc                      | No                   | Probably or possibly related          | 1                                    | 2                         |
|                                      |                                    | No                   | Definitely related                    | 1                                    | 1                         |
|                                      | Sinus Bradycardia                  | No                   | Probably not related                  | 0                                    | 1                         |
| Ventricular Tachycardia              | Yes                                | Probably not related | 0                                     | 1                                    |                           |
| Endocrine disorders                  | Hypoglycemia                       | No                   | Definitely not related                | 0                                    | 1                         |

| Organ System                                    | Adverse Event                          | SAE? | Relatedness of AE to study procedures | Hydroxychloroquine AEs reported, no. | Placebo AEs reported, no. |
|-------------------------------------------------|----------------------------------------|------|---------------------------------------|--------------------------------------|---------------------------|
| Gastrointestinal disorders                      | Abdominal Distension                   | Yes  | Definitely not related                | 0                                    | 1                         |
|                                                 | Bleeding Gastrointestinal              | Yes  | Definitely not related                | 1                                    | 0                         |
|                                                 | Diarrhea                               | No   | Probably or possibly related          | 0                                    | 1                         |
|                                                 | Gall stones                            | Yes  | Definitely not related                | 0                                    | 1                         |
|                                                 | Nausea                                 | No   | Probably or possibly related          | 2                                    | 1                         |
|                                                 | Nausea, Vomiting                       | No   | Probably or possibly related          | 1                                    | 0                         |
|                                                 | Nausea, Vomiting, Hematemesis          | Yes  | Definitely not related                | 1                                    | 0                         |
|                                                 | Nausea, Diarrhea                       | No   | Uncertain relationship                | 0                                    | 1                         |
|                                                 | Obstruction Bowel                      | Yes  | Definitely not related                | 1                                    | 0                         |
| General disorders                               | Contrast Extravasation                 | No   | Definitely not related                | 1                                    | 0                         |
|                                                 | Death                                  | Yes  | Definitely not related                | 2                                    | 0                         |
| Immune systems disorders                        | Allergic Reaction                      | No   | Definitely not related                | 1                                    | 0                         |
| Investigations (laboratories)                   | ALT Increased                          | No   | Probably or possibly related          | 1                                    | 0                         |
|                                                 | AST Increased                          | No   | Probably or possibly related          | 1                                    | 0                         |
|                                                 | Hypokalemia                            | Yes  | Probably not related                  | 0                                    | 1                         |
|                                                 | Multiple Liver Function Tests Abnormal | No   | Probably or possibly related          | 10                                   | 3                         |
|                                                 | Reaction Nonspecific                   | Yes  | Probably not related                  | 1                                    | 1                         |
| Musculoskeletal and connective tissue disorders | Hematoma Muscle                        | Yes  | Definitely not related                | 1                                    | 0                         |
|                                                 | Joint Pain                             | Yes  | Definitely not related                | 1                                    | 0                         |

| Organ System                                    | Adverse Event              | SAE?                   | Relatedness of AE to study procedures | Hydroxychloroquine AEs reported, no. | Placebo AEs reported, no. |
|-------------------------------------------------|----------------------------|------------------------|---------------------------------------|--------------------------------------|---------------------------|
| Nervous system disorders                        | Edema Cerebral             | Yes                    | Probably not related                  | 1                                    | 0                         |
|                                                 | Encephalopathy             | Yes                    | Definitely not related                | 1                                    | 0                         |
|                                                 | Headache                   | No                     | Probably or possibly related          | 3                                    | 1                         |
|                                                 |                            | No                     | Probably not related                  | 0                                    | 1                         |
|                                                 |                            | Yes                    | Definitely not related                | 0                                    | 1                         |
|                                                 | Intracranial hemorrhage    | Yes                    | Definitely not related                | 0                                    | 1                         |
|                                                 | Neuropathy Peripheral      | No                     | Definitely not related                | 0                                    | 1                         |
|                                                 | Stroke                     | Yes                    | Probably not related                  | 1                                    | 0                         |
| Yes                                             |                            | Definitely not related | 0                                     | 2                                    |                           |
| Renal and urinary disorders                     | Kidney Function Abnormal   | No                     | Definitely not related                | 1                                    | 0                         |
| Respiratory, thoracic and mediastinal disorders | Hypoxia                    | No                     | Probably not related                  | 1                                    | 1                         |
|                                                 |                            | Yes                    | Probably not related                  | 1                                    | 0                         |
|                                                 |                            | Yes                    | Definitely not related                | 1                                    | 0                         |
|                                                 | Pneumothorax               | Yes                    | Definitely not related                | 2                                    | 0                         |
|                                                 | Respiratory Distress       | Yes                    | Definitely not related                | 1                                    | 0                         |
|                                                 | Shortness of Breath        | Yes                    | Definitely not related                | 1                                    | 0                         |
| Skin and subcutaneous tissue disorders          | Itching                    | No                     | Definitely not related                | 0                                    | 1                         |
|                                                 | Rash                       | No                     | Probably not related                  | 1                                    | 1                         |
| Vascular disorders                              | Flushing                   | No                     | Uncertain relationship                | 0                                    | 1                         |
|                                                 | Hemorrhage Retroperitoneal | Yes                    | Definitely not related                | 0                                    | 1                         |
| Vascular or cardiac disorders                   | Vagal Reaction             | No                     | Definitely not related                | 1                                    | 0                         |
| Vascular or respiratory disorders               | Nosebleed                  | No                     | Probably or possibly related          | 0                                    | 1                         |
| <b>TOTAL</b>                                    |                            |                        |                                       | <b>50</b>                            | <b>39</b>                 |

**eFigure. Subgroup Analyses of the Primary Outcome**

The adjusted odds ratios and 95% confidence intervals (CI) for the primary outcome (COVID Outcomes Scale 14 days after randomization) are displayed, comparing hydroxychloroquine to placebo after adjusting for pre-specified baseline co-variables, including age, sex, baseline COVID Outcomes Scale, baseline SOFA score, and duration of acute respiratory symptoms prior to randomization. Reported P values represent the interaction between the baseline characteristic used to define subgroups and randomized group (hydroxychloroquine versus placebo) on the primary outcome.

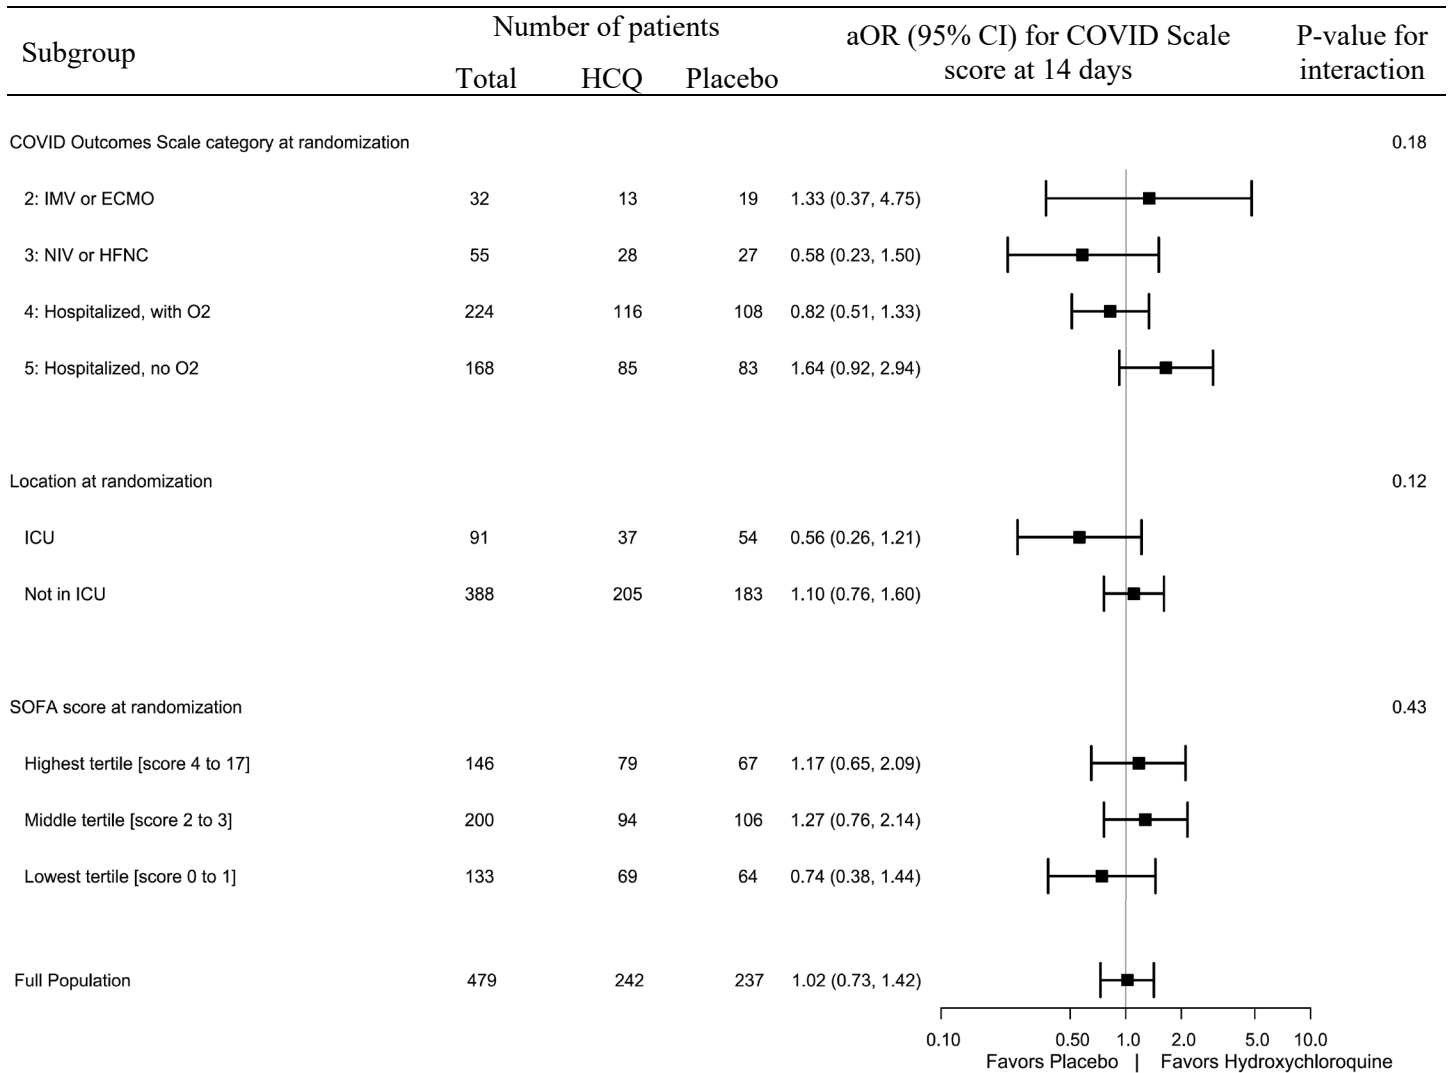

*(figure continued on next page)*

(figure continued from prior page)

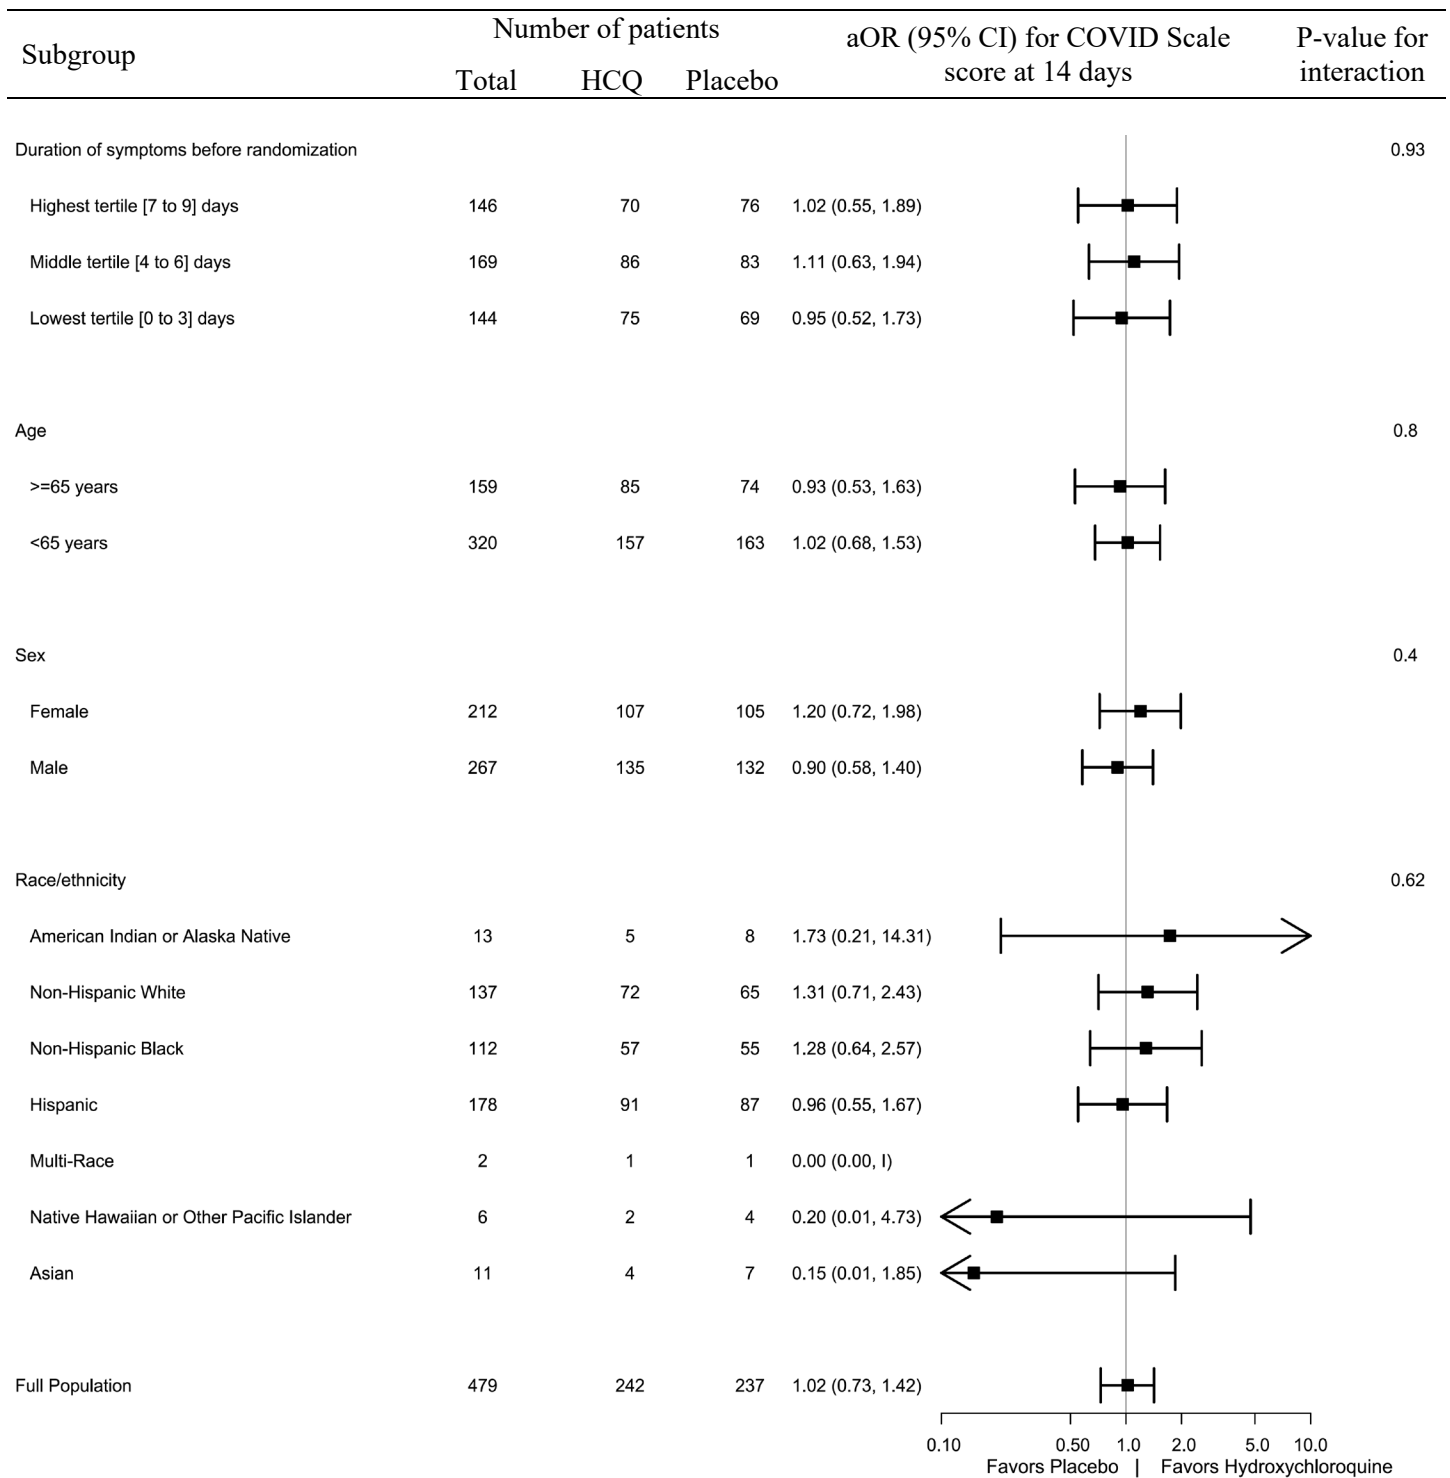

Supplement: jama-e2022240-s003.pdf [file jama-e2022240-s003.pdf]
