# Supplementary material
Source: PubMed Central journal article supplement (PMC7653542)
Supplement: jama-e2022240-s001.pdf [file jama-e2022240-s001.pdf]

1

---

# ORCHID Trial Protocol

---

2

3

## Outcomes Related to COVID-19 Treated with Hydroxychloroquine among In-patients with Symptomatic Disease

6

7

The PETAL Investigators

8

9 Title: **Outcomes Related to COVID-19** treated with **Hydroxychloroquine** among **In-patients**  
10 with symptomatic **Disease**

11 Acronym: ORCHID

12 Funder: The National Heart, Lung, and Blood Institute (NHLBI)

13 Network: The Prevention and Early Treatment of Acute Lung Injury (PETAL) Clinical Trials  
14 Network

15 Protocol: Version 4.0

16 Date: June 4, 2020

17

18

19

20

21

### Contacts:

23 Protocol Committee Contact: Wesley H. Self, MD, MPH

24 Coordinating Center Contact: B. Taylor Thompson, MD

25

## ORCHID Trial Leadership

26  
27  
28  
29  
30  
31  
32  
33  
34  
35  
36  
37  
38  
39  
40  
41  
42  
43  
44  
45  
46  
47  
48  
49  
50

### Protocol Committee Chair

Wesley H. Self, MD, MPH  
Vanderbilt University Medical Center  
Email: wesley.self@vumc.org

### Protocol Committee Co-Chair

Samuel M. Brown, MD, MS  
Intermountain Medical Center  
Email: samuel.brown@imail.org

### Protocol Committee Members

|                         |                    |
|-------------------------|--------------------|
| Samuel M. Brown         | Marc Moss          |
| Jonathan D. Casey       | Pauline Park       |
| Steven Y. Chang         | Todd W. Rice       |
| Sean P. Collins         | Bryce Robinson     |
| John Eppensteiner       | David Schoenfeld   |
| Kevin Gibbs             | Wesley H. Self     |
| Adit A. Ginde           | Matthew W. Semler  |
| Michelle N. Gong        | Nathan I. Shapiro  |
| Terri Hough             | Jay Steingrub      |
| Nicholas Johnson        | B. Taylor Thompson |
| Lindsay Leither         | Alexandra Weissman |
| Christopher J. Lindsell | Donald M. Yealy    |
| Michael Matthay         |                    |

### Coordinating Center at Massachusetts General Hospital

|                    |                  |
|--------------------|------------------|
| B. Taylor Thompson | Nancy Ringwood   |
| David Schoenfeld   | Cathryn Oldmixon |
| Douglas L. Hayden  |                  |

### PETAL Steering Committee Chair

Roy G. Brower

### NHLBI Officers

Lora Reineck  
Neil Aggarwal

### Consultants to the Protocol

|               |               |
|---------------|---------------|
| Frank Harrell | Donna Torr    |
| Dan M. Roden  | Timothy Uyeki |

## Table of Contents

|    |                                                                          |    |
|----|--------------------------------------------------------------------------|----|
| 51 |                                                                          |    |
| 52 |                                                                          |    |
| 53 | REVISIONS TO THE PROTOCOL.....                                           | 6  |
| 54 | ABBREVIATIONS .....                                                      | 8  |
| 55 | 1. STUDY SUMMARY.....                                                    | 9  |
| 56 | 2. TRIAL DESCRIPTION.....                                                | 12 |
| 57 | 2.1 Background.....                                                      | 12 |
| 58 | 2.1.1 COVID-19 Infection.....                                            | 12 |
| 59 | 2.1.2 Hydroxychloroquine as a Therapeutic for COVID-19 .....             | 12 |
| 60 | 2.1.3 Rationale for a Randomized Trial among Hospitalized Patients ..... | 13 |
| 61 | 2.1.4. Rationale for Evaluating Hydroxychloroquine Monotherapy .....     | 14 |
| 62 | 2.2 Study Aims.....                                                      | 14 |
| 63 | 2.2.1 Study aim.....                                                     | 14 |
| 64 | 2.2.2 Study hypothesis.....                                              | 14 |
| 65 | 2.3 Study Design.....                                                    | 14 |
| 66 | 3. STUDY POPULATION AND ENROLLMENT .....                                 | 14 |
| 67 | 3.1 Inclusion Criteria .....                                             | 14 |
| 68 | 3.2 Exclusion Criteria .....                                             | 15 |
| 69 | 3.3 Justification of Exclusion Criteria.....                             | 15 |
| 70 | 3.4 Screening.....                                                       | 15 |
| 71 | 3.5 Assessment of Eligibility and Exclusion Tracking .....               | 16 |
| 72 | 3.6 Process of Obtaining Informed Consent .....                          | 16 |
| 73 | 3.6.1 Paper-based approach .....                                         | 16 |
| 74 | 3.6.2 Electronic/e-consent approach.....                                 | 17 |
| 75 | 3.6.3 Attestation of informed consent.....                               | 18 |
| 76 | 3.7 Randomization and Blinding .....                                     | 18 |
| 77 | 3.8 Minorities and Women.....                                            | 19 |
| 78 | 4. STUDY INTERVENTIONS.....                                              | 19 |
| 79 | 4.1 Treatment of Study Participants.....                                 | 19 |
| 80 | 4.2 Hydroxychloroquine Group .....                                       | 19 |
| 81 | 4.3 Control Group .....                                                  | 20 |
| 82 | 4.4 Co-Interventions .....                                               | 20 |
| 83 | 4.5 On-Study Monitoring.....                                             | 20 |

|     |                                                                            |    |
|-----|----------------------------------------------------------------------------|----|
| 84  | 4.6 Criteria for Stopping Study Drug.....                                  | 21 |
| 85  | 5. OUTCOMES.....                                                           | 22 |
| 86  | 5.1 Primary Outcome .....                                                  | 22 |
| 87  | 5.2 Secondary Outcomes .....                                               | 22 |
| 88  | 5.3 Safety outcomes .....                                                  | 22 |
| 89  | 5.4 Rationale for Primary Outcome .....                                    | 23 |
| 90  | 6. DATA COLLECTION .....                                                   | 23 |
| 91  | 6.1 Baseline Variable Collection .....                                     | 23 |
| 92  | 6.2 Assessments between Hospital Presentation and Hospital Discharge ..... | 24 |
| 93  | 6.3 Assessments following Hospital Discharge .....                         | 25 |
| 94  | 7. STATISTICAL CONSIDERATIONS.....                                         | 26 |
| 95  | 7.1 Statistical Approach.....                                              | 26 |
| 96  | 7.2 Planned deviations from this design .....                              | 29 |
| 97  | 8. DATA QUALITY MONITORING AND STORAGE.....                                | 29 |
| 98  | 8.1 Data Quality Monitoring.....                                           | 29 |
| 99  | 8.2 Data Storage.....                                                      | 29 |
| 100 | 9. RISK ASSESSMENT .....                                                   | 29 |
| 101 | 9.1 Potential Risk to Participants .....                                   | 29 |
| 102 | 9.1.1 Potential risks of receiving hydroxychloroquine .....                | 30 |
| 103 | 9.1.2 Potential risks of receiving placebo with COVID-19.....              | 31 |
| 104 | 9.1.3 Potential risks of receiving an EKG. ....                            | 31 |
| 105 | 9.2 Minimization of Risk .....                                             | 31 |
| 106 | 9.3 Potential Benefit.....                                                 | 32 |
| 107 | 9.4 Risk in Relation to Anticipated Benefit .....                          | 32 |
| 108 | 10. HUMAN SUBJECTS PROTECTIONS .....                                       | 32 |
| 109 | 10.1 Selection of Subjects.....                                            | 32 |
| 110 | 10.2 Justification of Including Vulnerable Subjects .....                  | 32 |
| 111 | 10.3 Informed Consent.....                                                 | 33 |
| 112 | 10.4 Continuing Consent .....                                              | 33 |
| 113 | 10.5 Withdrawal of Consent .....                                           | 33 |
| 114 | 10.6 Identification of Legally Authorized Representatives .....            | 33 |
| 115 | 10.7 Justification of Surrogate Consent .....                              | 34 |
| 116 | 10.8 Additional Safeguards for Vulnerable Participants.....                | 34 |

|     |                                                                                         |    |
|-----|-----------------------------------------------------------------------------------------|----|
| 117 | 10.9 Confidentiality .....                                                              | 35 |
| 118 | 11. ADVERSE EVENTS .....                                                                | 35 |
| 119 | 11.1 Adverse Event Definitions .....                                                    | 35 |
| 120 | 11.2 Safety Monitoring .....                                                            | 36 |
| 121 | 11.3 Serious Adverse Events .....                                                       | 36 |
| 122 | 12. Data and Safety Monitoring Board (DSMB) .....                                       | 37 |
| 123 | 13. REFERENCES .....                                                                    | 39 |
| 124 | 14. APPENDICES .....                                                                    | 43 |
| 125 | Appendix A. Schedule of Events .....                                                    | 43 |
| 126 | Appendix B. Potential medication interactions with hydroxychloroquine .....             | 44 |
| 127 | Appendix C: Adverse Event Reporting and Unanticipated Events.....                       | 45 |
| 128 | C.1. Unanticipated Problems (UP) .....                                                  | 45 |
| 129 | C.2. Determining Relationship of Adverse Events to Study Drug or Study Procedures ..... | 45 |
| 130 | C.3. Clinical Outcomes that may be Exempt from Adverse Event Reporting.....             | 46 |
| 131 | C.4. Decision tree for determining if an adverse event is reportable.....               | 47 |
| 132 | Appendix D. Public Readiness and Emergency Preparedness Act.....                        | 48 |
| 133 | Appendix E: ORCHID-BUD Ancillary Study Protocol .....                                   | 49 |
| 134 |                                                                                         |    |
| 135 |                                                                                         |    |
| 136 |                                                                                         |    |

137 **REVISIONS TO THE PROTOCOL**

138

139 Protocol Version 1

140 Date: March 27, 2020

141 Initial protocol

142

143 Protocol Version 1.1

144 Date: March 29, 2020

145 Substantive protocol changes in Version 1.1:

- 146 1. Based on recommendations from FDA, the dose of hydroxychloroquine in the trial was changed  
147 from hydroxychloroquine 400 mg every 12 hours for 10 doses (version 1) to hydroxychloroquine  
148 400 mg every 12 hours for 2 doses followed by 200 mg every 12 hours for 8 doses (version 1.1).  
149 This change was made before any patients were enrolled and before the trial was posted on  
150 clinicaltrials.gov.

151

152 Protocol Version 2.0

153 Date: April 14, 2020

154 Substantive protocol changes in Version 2.0:

- 155 1. Inclusion criterion #4 changed so that only patients with laboratory-confirmed SARS-CoV-2  
156 infection are eligible. Patients with pending SARS-CoV-2 test results with a high clinical  
157 suspicion of COVID-19 are no longer eligible. This change was made because SARS-CoV-2  
158 laboratory results are now routinely available within hours of initial hospital presentation at  
159 participating hospitals (which was not true early in the COVID-19 pandemic).
- 160 2. Exclusion criterion #16 was added. This exclusion criterion states that a patient is excluded if the  
161 treating clinical team does not believe equipoise exists regarding the use of hydroxychloroquine  
162 for treatment of this patient.
- 163 3. Discussion of potential drug shortages was removed because study drug for all sites will be  
164 supplied by the PETAL Network and will not rely on local drug supplies.
- 165 4. Language describing consent processes was revised to increase precision.
- 166 5. Revised the statistical considerations section (Section 7).
- 167 6. Corrected the definition of serious adverse event in section 11.1 to harmonize with section 11.3
- 168 7. Added the following statement to Appendix C: “The Medical Monitor will provide to Sandoz  
169 Pharmacovigilance any significant safety findings (without disclosing protected health  
170 information) during the conduct of the trial.”
- 171 8. Added Appendix D: Public Readiness and Emergency Preparedness Act
- 172 9. Additional data collection added: Clinically diagnosed deep vein thrombosis (DVT) or  
173 pulmonary embolism (PE)
- 174 10. Clarification of patient co-morbidities added

175

176 Protocol Version 3.0

177 Date: May 4, 2020

178 Substantive Changes in Version 3.0:

- 179 1. Operationalized the definition of shortness of breath in inclusion criteria #3.
- 180 2. Added option for attestation of signature for confirmation of informed consent (section 3.6).
- 181 3. Clarified recommendations for stopping guidelines in statistical considerations section, using an
- 182 odds ratio to suggest futility of 1.1 (section 7.1).

183

184 Protocol Version 4.0

185 Date: June 4, 2020

186 Substantive Changes in Version 4.0

- 187 1. Added language for the DSMB to consider stopping the trial for harm (section 7.1): “If we
- 188 determine there is >70% probability that the odds ratio is <0.70, the DSMB should consider
- 189 stopping the trial for harm.”
- 190 2. Added language that enrollment will be paused after 510 participants until the DSMB reviews
- 191 primary outcome data from all 510 participants.
- 192 3. Added Appendix E: The ORCHID-BUD Outcomes Related to COVID-19 treated with
- 193 Hydroxychloroquine among In-patients with symptomatic Disease – Brain Outcomes and
- 194 Psychological Distress Ancillary study procedures.

195

196 **ABBREVIATIONS**

197

|        |                                                               |
|--------|---------------------------------------------------------------|
| ACE-I  | Angiotensin-converting-enzyme inhibitor                       |
| ARB    | Angiotensin II receptor blocker                               |
| ADR    | Adverse drug reaction                                         |
| AE     | Adverse event                                                 |
| DSMB   | Data safety monitoring board                                  |
| eCRF   | Electronic case report forms                                  |
| GFR    | Glomerular filtration rate                                    |
| ICU    | Intensive care unit                                           |
| IV     | Intravenous                                                   |
| LAR    | Legally authorized representative                             |
| LFT    | Liver function test                                           |
| MIC    | Minimum inhibitory concentration                              |
| NSAIDs | Nonsteroidal anti-inflammatory drug                           |
| PI     | Principal investigator (a clinician responsible for one site) |
| RCT    | Randomized control trial                                      |
| SAE    | Serious adverse events                                        |
| S/F    | SpO <sub>2</sub> /FiO <sub>2</sub> ratio                      |
| SOFA   | Sequential Organ Failure Assessment                           |
| SOP    | Standard operating Procedure                                  |

198

199

200

201

202

203



|                           |                                                                                                                                                                                                                                                                                                                                                                                                                                                                                                                                                                                                                                                                                                                                                                                                                                                                                                                                                                                                                                                                            |
|---------------------------|----------------------------------------------------------------------------------------------------------------------------------------------------------------------------------------------------------------------------------------------------------------------------------------------------------------------------------------------------------------------------------------------------------------------------------------------------------------------------------------------------------------------------------------------------------------------------------------------------------------------------------------------------------------------------------------------------------------------------------------------------------------------------------------------------------------------------------------------------------------------------------------------------------------------------------------------------------------------------------------------------------------------------------------------------------------------------|
| <b>Title</b>              | Hydroxychloroquine for the Early Treatment of COVID-19 in Hospitalized Adults: A Multicenter Randomized Clinical Trial                                                                                                                                                                                                                                                                                                                                                                                                                                                                                                                                                                                                                                                                                                                                                                                                                                                                                                                                                     |
| <b>Acronym</b>            | ORCHID<br><b>Outcomes Related to COVID-19 treated with Hydroxychloroquine among In-patients with symptomatic Disease</b>                                                                                                                                                                                                                                                                                                                                                                                                                                                                                                                                                                                                                                                                                                                                                                                                                                                                                                                                                   |
| <b>Background</b>         | Effective therapies for COVID-19 are urgently needed. Hydroxychloroquine is an antimicrobial agent with immunomodulatory and antiviral properties that has demonstrated <i>in vitro</i> activity against SARS-CoV-2, the virus that causes COVID-19. Preliminary reports suggest potential efficacy in small human studies. Clinical trial data are needed to determine whether hydroxychloroquine is effective in treating COVID-19.                                                                                                                                                                                                                                                                                                                                                                                                                                                                                                                                                                                                                                      |
| <b>Study Design</b>       | Blinded, multicenter, placebo-controlled randomized clinical trial                                                                                                                                                                                                                                                                                                                                                                                                                                                                                                                                                                                                                                                                                                                                                                                                                                                                                                                                                                                                         |
| <b>Intervention group</b> | Hydroxychloroquine 400 mg twice daily for two doses, then 200 mg twice daily for the subsequent eight doses (10 total doses)                                                                                                                                                                                                                                                                                                                                                                                                                                                                                                                                                                                                                                                                                                                                                                                                                                                                                                                                               |
| <b>Control group</b>      | Matched placebo twice daily for 10 total doses                                                                                                                                                                                                                                                                                                                                                                                                                                                                                                                                                                                                                                                                                                                                                                                                                                                                                                                                                                                                                             |
| <b>Sample Size</b>        | Up to 510 patients                                                                                                                                                                                                                                                                                                                                                                                                                                                                                                                                                                                                                                                                                                                                                                                                                                                                                                                                                                                                                                                         |
| <b>Inclusion Criteria</b> | <ol style="list-style-type: none"> <li>1. Age <math>\geq 18</math> years</li> <li>2. Currently hospitalized or in an emergency department with anticipated hospitalization.</li> <li>3. Symptoms of acute respiratory infection, defined as one or more of the following: <ol style="list-style-type: none"> <li>a. cough</li> <li>b. fever (<math>&gt; 37.5^{\circ} \text{C} / 99.5^{\circ} \text{F}</math>)</li> <li>c. shortness of breath (operationalized as any of the following: subjective shortness of breath reported by patient or surrogate; tachypnea with respiratory rate <math>\geq 22</math> /minute; hypoxemia, defined as SpO<sub>2</sub> <math>&lt; 92\%</math> on room air, new receipt of supplemental oxygen to maintain SpO<sub>2</sub> <math>\geq 92\%</math>, or increased supplemental oxygen to maintain SpO<sub>2</sub> <math>\geq 92\%</math> for a patient on chronic oxygen therapy).</li> <li>d. sore throat</li> </ol> </li> <li>4. Laboratory-confirmed SARS-CoV-2 infection within the past 10 days prior to randomization.</li> </ol> |
| <b>Exclusion Criteria</b> | <ol style="list-style-type: none"> <li>1. Prisoner</li> <li>2. Pregnancy</li> <li>3. Breast feeding</li> <li>4. Unable to randomize within 10 days after onset of acute respiratory infection symptoms</li> <li>5. Unable to randomize within 48 hours after hospital arrival</li> <li>6. Seizure disorder</li> <li>7. Porphyria cutanea tarda</li> <li>8. QTc <math>&gt; 500</math> ms on electrocardiogram within 72 hours prior to enrollment</li> <li>9. Diagnosis of Long QT syndrome</li> <li>10. Known allergy to hydroxychloroquine, chloroquine, or amodiaquine</li> </ol>                                                                                                                                                                                                                                                                                                                                                                                                                                                                                        |

|                           |                                                                                                                                                                                                                                                                                                                                                                                                                                                                                                                                                                                                                                                                                                                                                                                                                                                                                        |
|---------------------------|----------------------------------------------------------------------------------------------------------------------------------------------------------------------------------------------------------------------------------------------------------------------------------------------------------------------------------------------------------------------------------------------------------------------------------------------------------------------------------------------------------------------------------------------------------------------------------------------------------------------------------------------------------------------------------------------------------------------------------------------------------------------------------------------------------------------------------------------------------------------------------------|
|                           | <p>11. Receipt in the 12 hours prior to enrollment, or planned administration during the 5-day study period that treating clinicians feel cannot be substituted for another medication, of any of the following: amiodarone; cimetidine; dofetilide; phenobarbital; phenytoin; sotalol</p> <p>12. Receipt of &gt;1 dose of hydroxychloroquine or chloroquine in the 10 days prior to enrollment</p> <p>13. Inability to receive enteral medications</p> <p>14. Refusal or inability to be contacted on Day 15 for clinical outcome assessment if discharged prior to Day 15</p> <p>15. Previous enrollment in this trial</p> <p>16. The treating clinical team does not believe equipoise exists regarding the use of hydroxychloroquine for the treatment of this patient</p>                                                                                                         |
| <b>Randomization</b>      | Eligible participants will be randomized 1:1 to hydroxychloroquine versus placebo. Randomization will be completed in permuted blocks of variable size and stratified by site.                                                                                                                                                                                                                                                                                                                                                                                                                                                                                                                                                                                                                                                                                                         |
| <b>Blinding</b>           | Patients, treating clinicians, trial personnel, and outcome assessors will be blinded to group assignment.                                                                                                                                                                                                                                                                                                                                                                                                                                                                                                                                                                                                                                                                                                                                                                             |
| <b>Primary Outcome</b>    | <p>COVID Ordinal Outcomes Scale on Study Day 15:</p> <ol style="list-style-type: none"> <li>1. Death</li> <li>2. Hospitalized on invasive mechanical ventilation or ECMO</li> <li>3. Hospitalized on non-invasive ventilation or high flow nasal cannula</li> <li>4. Hospitalized on supplemental oxygen</li> <li>5. Hospitalized not on supplemental oxygen</li> <li>6. Not hospitalized with limitation in activity</li> <li>7. Not hospitalized without limitation in activity</li> </ol>                                                                                                                                                                                                                                                                                                                                                                                           |
| <b>Secondary Outcomes</b> | <ul style="list-style-type: none"> <li>• Time to recovery, defined as time to reaching level 5, 6, or 7 on the COVID Outcomes Scale, which is the time to the earlier of final liberation from supplemental oxygen or hospital discharge</li> <li>• All-location, all-cause 14-day mortality (assessed on Study Day 15)</li> <li>• All-location, all-cause 28-day mortality (assessed on Study Day 29)</li> <li>• COVID Ordinal Outcomes Scale on Study Day 3</li> <li>• COVID Ordinal Outcomes Scale on Study Day 8</li> <li>• COVID Ordinal Outcomes Scale on Study Day 29</li> <li>• Composite of death or receipt of ECMO through Day 28</li> <li>• Oxygen-free days through Day 28</li> <li>• Ventilator-free days through Day 28</li> <li>• Vasopressor-free days through Day 28</li> <li>• ICU-free days through Day 28</li> <li>• Hospital-free days through Day 28</li> </ul> |
| <b>Safety Outcomes</b>    | <ul style="list-style-type: none"> <li>• Seizure</li> <li>• Atrial or ventricular arrhythmia</li> <li>• Cardiac arrest</li> <li>• Elevation in aspartate aminotransferase or alanine aminotransferase to twice the local upper limit of normal</li> <li>• Acute pancreatitis</li> <li>• Acute kidney injury</li> <li>• Receipt of renal replacement therapy</li> </ul>                                                                                                                                                                                                                                                                                                                                                                                                                                                                                                                 |

|                 |                                                                                                                                                                                                                                                                                                                                                                                                                                                                                                                                                                                                                                                                                                                                                                                                                                                                                                                                                                                                                                                                                                                                                                                                                                                                                                                                                                                                                                                |
|-----------------|------------------------------------------------------------------------------------------------------------------------------------------------------------------------------------------------------------------------------------------------------------------------------------------------------------------------------------------------------------------------------------------------------------------------------------------------------------------------------------------------------------------------------------------------------------------------------------------------------------------------------------------------------------------------------------------------------------------------------------------------------------------------------------------------------------------------------------------------------------------------------------------------------------------------------------------------------------------------------------------------------------------------------------------------------------------------------------------------------------------------------------------------------------------------------------------------------------------------------------------------------------------------------------------------------------------------------------------------------------------------------------------------------------------------------------------------|
|                 | <ul style="list-style-type: none"> <li>• Symptomatic hypoglycemia</li> <li>• Neutropenia, lymphopenia, anemia, or thrombocytopenia</li> <li>• Severe dermatologic reaction</li> </ul>                                                                                                                                                                                                                                                                                                                                                                                                                                                                                                                                                                                                                                                                                                                                                                                                                                                                                                                                                                                                                                                                                                                                                                                                                                                          |
| <b>Analysis</b> | <p>The primary analysis will be an intention-to-treat comparison of the primary outcome between patients randomized to hydroxychloroquine versus placebo using a proportional odds model. An odds ratio (OR) &gt;1.0 indicates more favorable outcomes with hydroxychloroquine on the COVID Ordinal Outcome scale, while an OR &lt;1.0 indicates more favorable outcomes with placebo. The trial is designed with a Bayesian monitoring plan and has an anticipated sample size around 510 patients. The suggested stopping boundaries for the DSMB to consider include: &gt;95% probability that the OR is &gt;1.0 with a skeptical prior distribution (stop for efficacy); &gt;90% probability that the OR is &lt;1.1 with a flat prior (stop for futility); or &gt;70% probability that the OR is &lt;0.7 with a flat prior (stop for harm). With 5 interim analyses, a simulation showed that over 90% of trials would show efficacy on or before the fifth interim analysis (510 patients) if the true odds ratio were 1.8. Meanwhile, 6% of trials would show efficacy, and 77% would stop for futility if the odds ratio were 1.0. If the trial enrolls 510 participants, further enrollment will be paused until the DSMB reviews data on the primary outcome from all enrolled participants; a decision to continue enrollment will be made by NHLBI after reviewing DSMB recommendations while the investigators remain blinded.</p> |

206

207

## 208 **2. TRIAL DESCRIPTION**

### 209 **2.1 Background**

210 Coronavirus Disease 2019 (COVID-19) is an acute respiratory infectious illness caused by *severe acute*  
211 *respiratory syndrome coronavirus 2* (SARS-CoV-2).<sup>1,2</sup> Although the epidemiology has not been fully  
212 elucidated, most adults with COVID-19 appear to experience fever, cough, and fatigue and then recover  
213 within 1-3 weeks. However, a portion of adults with COVID-19 develop severe illness, typically  
214 manifesting as pneumonia and hypoxemic respiratory failure, with continued progression to acute  
215 respiratory distress syndrome (ARDS) and death in some cases.<sup>1-3</sup> Currently, no therapies have been  
216 demonstrated to prevent progression of COVID-19 to severe illness. Based on mechanism of action and  
217 early clinical experiences, several agents currently available in the United States (US) have been proposed  
218 as potential therapies to prevent progression.<sup>4-6</sup> Among these potential therapies, hydroxychloroquine has  
219 generated substantial interest due to its antiviral and immunomodulatory activity and established safety  
220 profile. In fact, many US hospitals are currently recommending hydroxychloroquine as first-line therapy  
221 for hospitalized patients with COVID-19 despite extremely limited clinical data supporting its  
222 effectiveness. Thus, data on the safety and effectiveness of hydroxychloroquine for the treatment of  
223 COVID-19 are urgently needed to inform clinical practice. In this trial, we will evaluate the safety and  
224 effectiveness of hydroxychloroquine for the treatment of adults hospitalized with COVID-19.

#### 225 **2.1.1 COVID-19 Infection**

226 COVID-19 was first identified as a cluster of cases of pneumonia among a group of workers from a  
227 seafood wholesale market in Wuhan, China in December 2019.<sup>7</sup> This observation, along with subsequent  
228 viral genotyping showing significant genetic similarities to the bat coronaviruses<sup>8</sup> suggest a zoonotic  
229 origin, although the specific reservoir and intermediary species remain unclear.<sup>9</sup> The COVID-19  
230 infection represents the seventh coronavirus known to cause disease in humans.<sup>10</sup> Four of the  
231 coronavirus viruses are known to cause symptoms of the common cold in immunocompetent  
232 individuals while two others (SARS-CoV and MERS-CoV) have caused recent outbreaks of severe and  
233 sometimes fatal respiratory diseases.<sup>11</sup> SARS-CoV-2 appears to exploit the same cellular receptor as  
234 SARS-CoV and MERS-CoV,<sup>12</sup> and its severity may similarly result from a predilection for  
235 intrapulmonary epithelial cells over cells of the upper airways.<sup>13,14</sup>

236 Since the first documented human case, COVID-19 has spread exponentially with 216,846 confirmed  
237 cases and 8,908 deaths as of March 18, 2020. While most patients recover after a mild, brief illness with  
238 fever and cough, the disease has a clinical spectrum ranging from asymptomatic infection<sup>15</sup> to ARDS and  
239 death.<sup>16</sup> The most common reasons for ICU care are respiratory failure and ARDS, with a minority  
240 developing shock and possibly cardiomyopathy.<sup>17</sup> The case fatality rate is estimated to be 0.25% to  
241 3.0%.<sup>18</sup>

#### 242 **2.1.2 Hydroxychloroquine as a Therapeutic for COVID-19**

243 Hydroxychloroquine is a medication approved by the US Food and Drug Administration and accounts for  
244 millions of US prescriptions annually. It is used both as an antiparasitic agent for malaria and an  
245 immunomodulatory agent for rheumatologic diseases. When used for short periods, hydroxychloroquine  
246 is generally well-tolerated, with the most common side effects including nausea, vomiting, diarrhea, rash,  
247 and headache. Mechanisms of action include: 1) immunomodulation: decreased inflammatory response

248 via inhibition of IL1, IL6, and tumor necrosis factor and impairment of complement-dependent antigen-  
249 antibody reactions; 2) antimalarial: increasing pH of the vacuole within malaria parasites preventing  
250 normal growth and replication; and 3) antiviral: increasing endosomal pH, which limits virus-cell fusion  
251 and interferes with glycosylation of cell receptors targeted by coronaviruses.<sup>4,5,19,20</sup> Recent laboratory  
252 studies demonstrate that hydroxychloroquine is a potent inhibitor of SARS-CoV-2 *in vitro*.<sup>4,5,21</sup> Based on  
253 these laboratory data and case series of clinical experiences, hydroxychloroquine has been proposed as a  
254 potential therapeutic for treatment of COVID-19.<sup>22</sup>

### 255 **2.1.3 Rationale for a Randomized Trial among Hospitalized Patients**

256 The initial symptoms of COVID-19 develop approximately 2-10 days after infection with the SARS-  
257 CoV-2 virus,<sup>23</sup> with the progression to respiratory failure and ARDS occurring approximately 7-10 days  
258 after the onset of symptoms.<sup>24</sup> While most adults with COVID-19 recover without complications,  
259 patients who require hospitalization experience high rates of complications. In case series of hospitalized  
260 patients with COVID-19, up to 26% require ICU admission and up to 17% die in the hospital.<sup>24,25</sup> The  
261 period between onset of symptoms and development of severe respiratory failure represents a potential  
262 window for treatment of hospitalized patients to prevent disease progression.

263 Given the unprecedented public health crisis caused by COVID-19, there is significant interest in finding  
264 effective therapies and, specifically, in repurposing approved medications with widespread availability  
265 and known safety profiles.<sup>3,26</sup> Potential therapies that are being considered include hydroxychloroquine,  
266 chloroquine, lopinavir/ritonavir, interferon  $\beta$ , and corticosteroids. Despite extremely limited clinical data,  
267 hydroxychloroquine has been adopted into treatment guidelines in China<sup>27</sup> and has been proposed as first-  
268 line therapy for hospitalized patients in institutional protocols for COVID-19 at some hospitals in the US.

269 Data on the safety and efficacy of hydroxychloroquine from randomized trials is urgently needed. A  
270 randomized clinical trial demonstrating that hydroxychloroquine prevents disease progression in  
271 hospitalized patients with COVID-19 would provide evidence-based therapy for an ongoing pandemic. A  
272 randomized clinical trial demonstrating that hydroxychloroquine is ineffective against COVID-19 would  
273 also have important public health impacts. Hydroxychloroquine is known to be associated with a risk of  
274 QT prolongation, seizure, bone marrow suppression, and neuromyopathy. Risks of hydroxychloroquine  
275 may increase in patients with decreased renal function and critical illness, as may occur in COVID-19. It  
276 also interacts with many medications commonly administered to hospitalized and critically ill patients. If  
277 hydroxychloroquine is not effective at treating COVID-19, patients should not be exposed to these  
278 potential toxicities. Additionally, prior trials have suggested that hydroxychloroquine may worsen  
279 outcomes for some viral infections. In a placebo-controlled trial of hydroxychloroquine for HIV  
280 treatment, it caused significantly higher HIV viral loads and lower CD4 counts.<sup>28</sup> A related drug,  
281 chloroquine, was shown to delay the immune response to Chikungunya infection and lead to higher viral  
282 loads and more lymphopenia in a non-human primate model.<sup>29</sup>

283 Given the need for effective treatments of COVID-19, the unclear efficacy and safety of  
284 hydroxychloroquine as a treatment of COVID-19, and the widespread clinical use of hydroxychloroquine  
285 during the current pandemic, a randomized clinical trial is urgently needed.

286

#### 287 **2.1.4. Rationale for Evaluating Hydroxychloroquine Monotherapy**

288 In addition to hydroxychloroquine, several other medications have been proposed as potential therapies  
289 for COVID-19, including remdesivir and azithromycin. Remdesivir treatment for COVID-19 is being  
290 studied in a clinical trial sponsored by the National Institute of Allergy and Infectious Diseases (NIAID)  
291 [NCT04280705]. Azithromycin is a macrolide antibiotic that is commonly used in the US for treatment of  
292 respiratory infections. During the design of this protocol, the investigators considered studying  
293 combination therapy of hydroxychloroquine plus remdesivir and hydroxychloroquine plus azithromycin.  
294 The investigators noted that combination therapy would likely increase the risk of toxicities. With no  
295 preliminary data suggesting combination therapy is likely to be more effective than hydroxychloroquine  
296 monotherapy, the investigators believe the risks of studying combination therapy likely outweigh the  
297 benefits at this time. Additionally, results of a trial evaluating combination therapy may be difficult to  
298 interpret. Trial results suggesting effectiveness would probably not be attributable to a single agent and  
299 would leave uncertainty about whether treatment with combination therapy is preferable to monotherapy.  
300 Furthermore, null results of a trial evaluating combination therapy could occur if neither agent is  
301 effective, if one is effective and one is detrimental, or if both are effective but there are unfavorable drug-  
302 drug interactions. Interpretation of a trial of one agent will be straightforward and may provide the basis  
303 for subsequent trials of combination therapy. The investigators note that two distinct, simultaneously  
304 conducted placebo-controlled randomized trials evaluating remdesivir and hydroxychloroquine separately  
305 will provide high quality data on the effectiveness and safety of each agent versus placebo.

306

### 307 **2.2 Study Aims**

#### 308 **2.2.1 Study aim**

309 To compare the effect of hydroxychloroquine versus placebo on clinical outcomes, measured using the  
310 COVID Ordinal Outcomes Scale at Day 15, among adults with COVID-19 requiring hospitalization.

#### 311 **2.2.2 Study hypothesis**

312 Among adults hospitalized with COVID-19, administration of hydroxychloroquine will improve clinical  
313 outcomes at Day 15.

### 314 **2.3 Study Design**

315 We will conduct an investigator-initiated, multicenter, blinded, placebo-controlled, randomized clinical  
316 trial evaluating hydroxychloroquine for the treatment of adults hospitalized with COVID-19. Patients,  
317 treating clinicians, and study personnel will all be blinded to study group assignment.

318

## 319 **3. STUDY POPULATION AND ENROLLMENT**

### 320 **3.1 Inclusion Criteria**

- 321 1. Age  $\geq$ 18 years
- 322 2. Currently hospitalized or in an emergency department with anticipated hospitalization.

- 323 3. Symptoms of acute respiratory infection, defined as one or more of the following:  
324 a. Cough  
325 b. fever (> 37.5° C / 99.5° F)  
326 c. shortness of breath (operationalized as any of the following: subjective shortness of  
327 breath reported by patient or surrogate; tachypnea with respiratory rate  $\geq 22$  /minute;  
328 hypoxemia, defined as SpO<sub>2</sub> <92% on room air, new receipt of supplemental oxygen to  
329 maintain SpO<sub>2</sub>  $\geq 92\%$ , or increased supplemental oxygen to maintain SpO<sub>2</sub>  $\geq 92\%$  for a  
330 patient on chronic oxygen therapy).  
331 d. sore throat  
332 4. Laboratory-confirmed SARS-CoV-2 infection within the past 10 days prior to randomization  
333

### 334 3.2 Exclusion Criteria

- 335 1. Prisoner  
336 2. Pregnancy  
337 3. Breast feeding  
338 4. Unable to randomize within 10 days after onset of acute respiratory infection symptoms  
339 5. Unable to randomize within 48 hours after hospital arrival  
340 6. Seizure disorder  
341 7. Porphyria cutanea tarda  
342 8. QTc >500 ms on electrocardiogram within 72 hours prior to enrollment  
343 9. Diagnosis of Long QT syndrome  
344 10. Known allergy to hydroxychloroquine, chloroquine, or amodiaquine  
345 11. Receipt in the 12 hours prior to enrollment, or planned administration during the 5-day study  
346 period that treating clinicians feel cannot be substituted for another medication, of any of the  
347 following: amiodarone; cimetidine; dofetilide; phenobarbital; phenytoin; sotalol  
348 12. Receipt of >1 dose of hydroxychloroquine or chloroquine in the 10 days prior to enrollment  
349 13. Inability to receive enteral medications  
350 14. Refusal or inability to be contacted on Day 15 for clinical outcome assessment if discharged  
351 prior to Day 15  
352 15. Previous enrollment in this trial  
353 16. The treating clinical team does not believe equipoise exists regarding the use of  
354 hydroxychloroquine for the treatment of this patient

### 355 3.3 Justification of Exclusion Criteria

356 The exclusion criteria are primarily designed for patient safety. In addition to excluding specific  
357 vulnerable populations (e.g., prisoners), these criteria are designed to exclude patients for whom receipt of  
358 hydroxychloroquine might increase the risk of serious adverse events. For example, patients who have a  
359 prolonged QTc or are taking medications that would increase the risk of experiencing a prolonged QTc  
360 when combined with hydroxychloroquine are excluded to minimize the risk of Torsades de Pointes.

### 361 3.4 Screening

362 The site investigator or delegate will screen for hospitalized patients with laboratory confirmed COVID-  
363 19 (that is, a positive laboratory test for SARS-CoV-2) or a pending SARS-CoV-2 test. Treating  
364 clinicians will also be instructed to contact the site investigator or delegate for patients with a high clinical  
365 suspicion of COVID-19.

366 **3.5 Assessment of Eligibility and Exclusion Tracking**

367 For patients who appear to meet inclusion criteria during screening, an electronic case report form will be  
368 completed to determine eligibility and track exclusions. The electronic case report form will be accessed  
369 and stored in the electronic database. At the time of entry into the screening database, the patient will be  
370 assigned a screening number.

371 If a patient appears to meet all eligibility criteria, the site investigator or delegate will approach the  
372 treating clinician to ask permission to approach the patient or Legally Authorized Representative (LAR)  
373 to confirm eligibility, discuss potential study recruitment, and proceed with informed consent.

374 For all excluded patients, including refusal by the treating clinician or patient/surrogate, a small number  
375 of de-identified variables will be collected including month and year the patient met screening criteria,  
376 age, sex, ethnicity, patient location, and reason(s) patient was excluded. For the safety of research  
377 personnel and conservation of personal protective equipment, these encounters may occur via telephone  
378 or videophone.

379 **3.6 Process of Obtaining Informed Consent**

380 Informed consent will be obtained from the patient or from a surrogate decision maker if the patient lacks  
381 decision-making capacity.

382 In some instances, bringing a paper consent form and pen to the bedside of a patient with known or  
383 suspected COVID-19 and then taking these out of the room would violate infection control principles and  
384 policies. Given the infectious risk from COVID-19 and potential shortages of personal protective  
385 equipment (PPE), there is a moral and practical imperative to minimize face-to-face contact between  
386 patients and non-clinical personnel. The current epidemic also presents unique challenges to obtaining  
387 consent from participant’s legally authorized representative (LAR). To minimize infectious risk, many  
388 institutions are not allowing visitors to enter the hospital. Furthermore, the LAR is likely to have been  
389 exposed to the patient and may therefore be under self-quarantine at the time of the informed consent  
390 discussion.

391 Therefore, in addition to the traditional approach of an in-person consent discussion and signed paper  
392 informed consent document, we will allow use of “no-touch” consent procedures for this trial. Below, we  
393 outline three examples of no-touch consent procedures that may be used: (a) a paper-based approach; (b)  
394 an electronic/e-consent approach; and (c) attestation of informed consent.

396 **3.6.1 Paper-based approach**

- 397 1. The informed consent document is delivered to the patient or LAR.  
398 a. If the patient or LAR is on-site, the informed consent document may be delivered to the  
399 patient or LAR either by research staff or by clinical staff  
400 b. If the LAR is off-site, the informed consent document may be emailed, faxed, or  
401 otherwise electronically transferred to the LAR (method dictated by institutional policy)
- 402 2. Research staff discuss the informed consent document with the patient or LAR either in-person or  
403 by telephone or videophone. *This step confirms subject/LAR identity.*



- 404 3. If the patient or LAR decides to consent to participate, the patient or LAR signs the paper copy of  
405 the informed consent document.
- 406 4. A photograph is taken of the signature page of the informed consent document and uploaded into  
407 the electronic database (e.g. REDCap).
  - 408 a. If using the patient's device (such as a patient's personal cellular phone), a survey link  
409 can be sent to their device to allow direct upload of the image into the electronic database  
410 (e.g. REDCap).
  - 411 b. If using a staff device, it must be approved to store PHI by the local institution. In that  
412 case, research personnel can take a photograph of the signature page of the informed  
413 consent document either directly or through the window or glass door leading into the  
414 patient's room. The photograph can then be uploaded into the electronic database. If a  
415 staff device is taken into the patient's room to take a photograph it must be able to be  
416 disinfected according to local institutional practices.
- 417 5. Research staff and witness provide signatures within the electronic database (e.g. REDCap)  
418 confirming their participation in the informed consent process.
- 419 6. The patient or LAR retains the paper consent document. The image of the signature page may be  
420 printed and bundled with a copy of the blank informed consent document for research records.  
421

### 422 3.6.2 Electronic/e-consent approach

- 423 1. The electronic informed consent document is opened on a research device or a link for the  
424 electronic informed consent document is sent to the patient's or LAR's device.
- 425 2. Research staff discuss the informed consent document with the patient or LAR either in person or  
426 by telephone or videophone. *This step confirms subject/LAR identity.*
- 427 3. If the patient or LAR decides to consent to participate the patient or LAR signs the electronic  
428 informed consent document. This signature may be either:
  - 429 a. an actual signature (often tracing a finger on the screen) OR
  - 430 b. a username and password specific to the individual signing
- 431 4. Research staff and witness provide signatures within the electronic database (e.g., REDCap)  
432 confirming their participation in the informed consent process.
- 433 5. The image of the signature page may be printed and bundled with a copy of the blank informed  
434 consent document for research records.  
435

436 If a hospital device is provided to facilitate electronic or paper-based consent, that device will be  
437 disinfected according to institutional protocols and removed by research staff or clinical staff during the  
438 next entry into the patient's room.

439 This approach complies with relevant regulations and sub-regulator guidance at 45 CFR 46.117, 45 CFR  
440 164.512, 21 CFR 11 Subpart C (11.100–11.300), [https://www.hhs.gov/ohrp/regulations-and-  
441 policy/guidance/use-electronic-informed-consent-questions-and-answers/index.html](https://www.hhs.gov/ohrp/regulations-and-policy/guidance/use-electronic-informed-consent-questions-and-answers/index.html),  
442 <https://www.fda.gov/regulatory-information/search-fda-guidance-documents/informed-consent>

443 The information for the informed consent discussion will be provided in a formal document (or electronic  
444 equivalent) that has been approved by the IRB and in a language comprehensible to the potential  
445 participant, using an interpreter if necessary. The information presented in the consent form and by the  
446 research staff will detail the nature of the trial and what is expected of participants, including any

447 potential risks or benefits of taking part. It will be clearly stated that the participant is free to withdraw  
448 from the trial at any time for any reason without prejudice to future care, and with no obligation to give  
449 the reason for withdrawal. Where a patient does not speak English, a short-form consent and qualified  
450 interpreter will be employed, using similar “no-touch” principles. Use of an interpreter and the  
451 interpreter’s identity will be documented on the electronic consent.

### 452 **3.6.3 Attestation of informed consent**

453 If none of the options outlined above (traditional signature and storage of a paper consent form, electronic  
454 photographs of a signed consent page, or e-consent) are available, study personnel may attest to  
455 completion of the informed consent process using the procedures outlined below. Importantly, the  
456 process of informed consent using this attestation option should not change compared with the traditional  
457 method of obtaining informed consent for trial participation except for the method of documenting the  
458 consent process in the research record. Rather than storing a paper document with the participant’s  
459 signature, a member of the research team and an impartial witness will attest to completion of the  
460 informed consent process and that the participant signed the informed consent document. This option of  
461 attestation of informed consent is not available when obtaining consent through an LAR.

462 Procedures for attestation of informed consent:

- 463 1. An unsigned paper consent form is provided to the patient by a health care worker or study  
464 member.
- 465 2. The study member obtaining consent arranges an in-person meeting or three-way call or video  
466 conference with himself/herself, the patient, and an impartial witness. If desired and feasible,  
467 additional people requested by the patient (e.g., next of kin) may also join this discussion.
- 468 3. Study member reviews consent and answers questions in the presence of the impartial witness.
- 469 4. Patient signs the paper informed consent document while the witness is listening on the phone or  
470 directly observing.
- 471 5. Patient provides verbal confirmation that he/she would like to participate in the trial and he/she  
472 has signed and dated the informed consent document. This signed informed consent document  
473 stays with the patient due to the risk of spreading the virus.
- 474 6. Study member and witness attest that other techniques for documenting informed consent were  
475 not available for this participant and that the participant provided written informed consent for  
476 trial participation by signing a paper informed consent document. An attestation form is available  
477 in the ORCHID REDCap toolkit for documenting this attestation. This attestation page with  
478 signatures from the study member and witness will be save as evidence of the informed consent  
479 process. A signature from the participant will not be saved in the research record.

### 481 **3.7 Randomization and Blinding**

482 Participants confirmed to meet all eligibility criteria who have provided informed consent will be  
483 randomized 1:1 to hydroxychloroquine versus placebo. A randomization code will be provided to the  
484 site investigator or delegate from a centralized, web-based platform. Randomization will require  
485 provision of the screening number and confirmation of patient eligibility.

486 Randomization will be completed in permuted blocks of varying size and stratified by site. The  
487 randomized sequence allocation will be stored on a secure server and will not be available to site study  
488 personnel. Site research personnel will have a unique Personal Identification Number (PIN) to access the

489 randomization system. Each subject will receive a computer-generated randomization ID number. The  
490 computer-generated randomization ID number will be provided to the pharmacy who will provide a dose  
491 pack containing hydroxychloroquine or placebo. The participant, treating clinicians, study personnel, and  
492 outcome assessors will all remain blinded to group assignment until after the database is locked and  
493 blinded analysis is completed.

### 494 **3.8 Minorities and Women**

495 No patients will be excluded on the basis of race, ethnicity, or sex. The clinical coordinating center will  
496 monitor recruitment of minorities and women. If necessary, additional recruitment efforts will be made to  
497 ensure that the aggregate patient sample contains representative race/ethnicity and sex subsets.

498

## 499 **4. STUDY INTERVENTIONS**

### 500 **4.1 Treatment of Study Participants**

501 A summary of the trial's schedule of events is included in Appendix A.

502 Timing of study procedures is based on the time of randomization, which is defined as "Time 0". The  
503 primary outcome will be assessed on Study Day 15, which corresponds to 14 days (2 weeks) after  
504 randomization.

505 Study medications will be administered by clinical or research personnel while the patient is hospitalized.  
506 The first dose of study medications will be administered within 4 hours of randomization. In the hospital,  
507 medication delivery after the first dose will correspond to the timing of morning and evening medication  
508 delivery for the hospital/unit. If the patient is discharged prior to completion of the study medication, the  
509 patient will be discharged with the study medication packet to complete the course after discharge. At  
510 home, the patient will be instructed to take the morning dose upon awakening and the evening dose  
511 approximately 12 hours later.

512 On Study Days 1-5, study personnel will review patient records to confirm administration of study drug  
513 and document the number and reason for any missed doses. For patients who are discharged prior to Day  
514 5, study personnel will obtain data on study drug adherence and safety outcomes from the patient or  
515 surrogate at via telephone follow-up scheduled at Day 8. Research personnel will also assess patients at  
516 Day 15 and Day 29; these assessments will be completed by phone if the patient has been discharged  
517 from the hospital.

### 518 **4.2 Hydroxychloroquine Group**

519 Participants assigned to the hydroxychloroquine arm will receive hydroxychloroquine sulfate 400 mg  
520 enterally twice daily for the first two doses and then 200 mg twice daily for the subsequent eight doses  
521 ("Days 2 – 5"). This dosing regimen is a total of 10 doses over 5 days with an 800 mg load in the first 24  
522 hours divided into two doses followed by 400 mg daily divided into two doses over the following 4 days.  
523 Medication dose packs containing all 10 doses will be provided at randomization by the investigational  
524 pharmacy.

525 Hydroxychloroquine is available in 200 mg oral tablets of hydroxychloroquine sulfate. Common  
526 hydroxychloroquine dosing for treatment of uncomplicated malaria is 800 mg followed by 400 mg at 6  
527 hours, 24 hours, and 48 hours. Common initial dosing for rheumatoid arthritis is 400 mg to 600 mg daily.  
528 For this COVID-19 trial, we selected a dose of hydroxychloroquine (400 mg twice daily for the first two  
529 doses followed by 200 mg twice daily for next 8 doses) based on similar doses being well tolerated in the  
530 treatment of other conditions and *in vitro* studies suggesting that SARS-CoV-2 inhibition is achieved by a  
531 dose of 800 mg on the first day followed by 400 mg for the following 4 days.<sup>5</sup> This dose and duration is  
532 comparable to the dose and duration being administered empirically to patients with COVID-19 as a part  
533 of clinical care during the current epidemic.

### 534 **4.3 Control Group**

535 Participants randomized to the control group will receive matching placebo enterally twice daily matching  
536 the dosing regimen described above for hydroxychloroquine. Medication dose packs containing all 10  
537 doses will be provided at randomization by the Investigational Pharmacy. The placebo pills will be as  
538 similar as possible to the hydroxychloroquine pills to ensure blinding.

### 539 **4.4 Co-Interventions**

540 This trial will control the use of hydroxychloroquine vs placebo during the 5-day intervention period.  
541 Enrolled participants will not receive open-label hydroxychloroquine or chloroquine during the 5-day  
542 intervention period. All other treatment decisions will be made by treating clinicians without influence  
543 from the protocol. Administration of other antiviral medications (“rescue therapy”) will be allowed. The  
544 decision to administer other antiviral medications will be made by treating clinicians and will be recorded  
545 in the case report form. The decision to administer immunomodulating medications, including  
546 corticosteroids, will be made by treating clinicians and will be recorded in the case report form.

### 547 **4.5 On-Study Monitoring**

548 All patients enrolled in the study will be initially hospitalized and will therefore receive monitoring as a  
549 part of routine clinical care, including monitoring by their physicians, nurses, respiratory therapists, and  
550 ancillary staff.

551 In addition to routine clinical monitoring, enrolled patients will have an assessment of the QTc with an  
552 electrocardiogram (EKG) or rhythm strip performed 24-48 hours after administration of the first study  
553 medication. If an EKG or rhythm strip has been performed as a part of clinical care during this window,  
554 study personnel will assess the QTc on these clinically performed tracings. If an EKG or rhythm strip has  
555 not been performed as a part of clinical care during this window, an EKG or rhythm strip will be ordered  
556 and performed as a part of study procedures. This QTc will be used to monitor patient safety and inform  
557 stopping of the study drug as described below. If a patient is discharged from the hospital before the QTc  
558 is evaluated at 24-48 hours, the study drug may be continued after discharge without this assessment.

559 Between randomization and Day 5, study personnel will review the electronic health record daily for  
560 potential medication interactions with hydroxychloroquine (see Appendix B). If a medication that is  
561 considered to be contraindicated with hydroxychloroquine is discovered, treating clinicians will be  
562 contacted to discuss if stopping study drug is appropriate or if the medication in question can be stopped  
563 or substituted. If a medication with a potential interaction with hydroxychloroquine is identified, study

564 personnel will contact treating clinicians to ensure they are aware of the potential interaction. Treating  
565 clinicians will determine whether an alternative medication would be appropriate or whether the risk-  
566 benefit ratio favors continuing the medication with the known potential interaction. If a patient is started  
567 on a medication listed in Appendix B that potentially prolongs the QTc, study personnel will recommend  
568 to treating clinicians use of continuous cardiac monitoring when available during the study drug treatment  
569 period.

570 In addition to manual monitoring by study personnel for medication interactions, many electronic health  
571 records contain tools within the electronic order entry system to automatically screen for medication  
572 interactions with hydroxychloroquine and notify ordering providers of the potential interaction at the time  
573 of order entry.

#### 574 **4.6 Criteria for Stopping Study Drug**

575 Administration of the blinded study drug may be stopped temporarily or permanently for (a) adverse  
576 events, (b) results of on-study monitoring, (c) clinical deterioration, or (d) evidence of an alternative cause  
577 to the patient's symptoms.

578 If a patient experiences an adverse event that the patient (or legally authorized representative), treating  
579 clinicians, or investigators feel merits temporarily or permanently stopping the study drug, the study drug  
580 will be stopped. The explanation for stopping the study drug will be recorded in the case report form, and  
581 the adverse event will be recorded and reported according to the adverse event guidelines below. If the  
582 adverse event resolves to the extent that the patient (or legally authorized representative), treating  
583 clinicians, and investigators feel that resuming the study drug is appropriate, the study drug will be  
584 resumed, and this information will be recorded in the case report form.

585 If a QTc assessed after randomization is >500 ms, the study drug will be discontinued for 24 hours and a  
586 repeat EKG will be performed daily until either the QTc is less than 500 ms, at which time study drug is  
587 resumed until 5 days after randomization with daily QTc assessments, or until 5 days after randomization  
588 is reached without resumption of study drug. Both the value for the QTc and the decision to continue or  
589 stop the study drug will be recorded in the case report form. If the QTc in hospitalized patients cannot be  
590 assessed at 24-48 hours, study drug will be discontinued until the QTc can be assessed. If the daily on-  
591 study monitoring by study personnel for medication interactions indicates a potential interaction with a  
592 medication that treating clinicians feel is required for the optimal treatment of the patient and with which  
593 treating clinicians and the investigator feel it would be unsafe to administer hydroxychloroquine  
594 (including but not limited to: amiodarone; cimetidine; chloroquine; dofetilide; phenobarbital; phenytoin;  
595 sotalol), the study drug will be stopped and the reason will be recorded in the case report form.

596 Patients on study may experience clinical deterioration due to their illness. Clinical deterioration will be  
597 defined as a decrease of 1 point or more on the ordinal scale for the primary outcome (e.g., patient  
598 transitions from "hospitalized on supplemental oxygen" to "hospitalized on non-invasive ventilation or  
599 high flow nasal cannula"). Patients who experience clinical deterioration in either group may be  
600 administered other antivirals or immunomodulators as "rescue therapy". For patients who experience  
601 clinical deterioration for which treating clinicians feel optimal care would be to stop the study drug,  
602 unblind group assignment, and administer hydroxychloroquine to patients in the placebo group, the study  
603 drug will be stopped, the site investigator will contact the coordinating center to receive the unblinded

604 study group assignment, and any additional treatment will be deferred to treating clinicians. In this  
605 situation, the following data will be recorded in the case report form: the criteria met for clinical  
606 deterioration; the reason for stopping study drug and unblinding; use of hydroxychloroquine, other  
607 antivirals, and immunomodulators; and study outcomes. Crossovers from placebo to open-label  
608 hydroxychloroquine will be recorded and reported to the DSMB at DSMB reviews and interim analyses.

609 Before implementation of protocol version 2.0, patients could be enrolled with a pending SARS-CoV-2  
610 test result if clinical criteria were present suggesting a high likelihood of COVID-19. In these patients, if  
611 SARS-CoV-2 results returned negative and the clinical team identified a likely alternative cause of the  
612 patient's clinical syndrome, the clinical team could elect to stop administration of the study drug. If the  
613 study drug was stopped for this reason, the timing and reason for study drug discontinuation was  
614 recorded. After implementation of protocol version 2.0, only patients with laboratory-confirmed SARS-  
615 CoV-2 infection are eligible.

## 616 **5. OUTCOMES**

### 617 **5.1 Primary Outcome**

618 COVID Ordinal Outcomes Scale on Study Day 15:

- 619 1. Death
- 620 2. Hospitalized on invasive mechanical ventilation or ECMO
- 621 3. Hospitalized on non-invasive ventilation or high flow nasal cannula
- 622 4. Hospitalized on supplemental oxygen
- 623 5. Hospitalized not on supplemental oxygen
- 624 6. Not hospitalized with limitation in activity
- 625 7. Not hospitalized without limitation in activity

### 626 **5.2 Secondary Outcomes**

- 627 • Time to recovery, defined as time to reaching level 5, 6, or 7 on the COVID Outcomes Scale,  
628 which is the time to the earlier of final liberation from supplemental oxygen or hospital discharge
- 629 • All-location, all-cause 14-day mortality (assessed on Study Day 15)
- 630 • All-location, all-cause 28-day mortality (assessed on Study Day 29)
- 631 • COVID Ordinal Outcomes Scale on Study Day 3
- 632 • COVID Ordinal Outcomes Scale on Study Day 8
- 633 • COVID Ordinal Outcomes Scale on Study Day 29
- 634 • Composite of death or receipt of ECMO through Day 28
- 635 • Oxygen-free days through Day 28
- 636 • Ventilator-free days through Day 28
- 637 • Vasopressor-free days through Day 28
- 638 • ICU-free days through Day 28
- 639 • Hospital-free days through Day 28

### 640 **5.3 Safety outcomes**

- 641 • Seizure
- 642 • Atrial or ventricular arrhythmia
- 643 • Cardiac arrest

- 644 • Elevation in aspartate aminotransferase or alanine aminotransferase to twice the local upper limit
- 645 of normal
- 646 • Acute pancreatitis
- 647 • Acute kidney injury
- 648 • Receipt of renal replacement therapy
- 649 • Symptomatic hypoglycemia
- 650 • Neutropenia, lymphopenia, anemia, or thrombocytopenia
- 651 • Severe dermatologic reaction

## 652 **5.4 Rationale for Primary Outcome**

653 COVID-19 has a broad spectrum of clinical severity. Even among hospitalized patients, most recover  
654 without experiencing critical illness.<sup>30</sup> Designing a trial with statistical power to detect a meaningful  
655 difference in ICU-free days or mortality might require an unfeasibly large sample size and could miss  
656 significant morbidity experienced by the majority of hospitalized patients. Since the majority of  
657 morbidity from COVID-19 relates to hypoxemia, the fact that this outcome is tied to degree of hypoxemic  
658 respiratory failure increases its face validity and relevance. For similar reasons, previous trials of severe  
659 influenza have employed a similar ordinal outcome.<sup>31</sup> This ordinal scale has been selected as an outcome  
660 in multiple ongoing COVID-19 trials and is a preferred outcome by the World Health Organization  
661 Research and Development Blueprint for COVID-19.<sup>32</sup> Use of this standardized outcome will increase the  
662 potential to compare the results of this trial with other trials and perform meta-analyses.

663

## 664 **6. DATA COLLECTION**

665 Given the infectious risk from COVID-19 and potential shortages of personal protective equipment  
666 (PPE), we will minimize face-to-face contact between patients and non-clinical staff. Additionally,  
667 minimizing research activities and conducting the trial in a pragmatic manner will increase the ability to  
668 complete the trial in the face of strained clinical and research resources during the COVID-19 pandemic.  
669 We will emphasize data that can be collected from the electronic health record, radiographs obtained as  
670 part of routine clinical care, and assessments that can be completed over the telephone as needed.

671 Biological specimens will not be collected as part of this trial. To further elucidate the pathophysiology  
672 of COVID-19 and the effects of hydroxychloroquine, we encourage ancillary studies and co-enrollment in  
673 observational studies that collect biological specimens and more detailed data.

### 674 **6.1 Baseline Variable Collection**

- 675 • Presence or absence of inclusion and exclusion criteria
- 676 • Date and time of randomization
- 677 • Date of symptom onset
- 678 • Admission data: date and time of presentation, origin (home, skilled nursing facility,  
679 rehabilitation/LTACH, nursing home, outside hospital, outside ICU), location at enrollment (ED,  
680 hospital ward, ICU)
- 681 • Demographics (age, sex, race, ethnicity, height, weight)

- 682 • Comorbidities: AIDS, Leukemia, Malignant Lymphoma, Hemiplegia, Cerebrovascular Disease, A
- 683 prior myocardial infarction, Congestive Heart Failure, Peripheral vascular disease, Dementia,
- 684 COPD, Connective tissue disease, Peptic ulcer disease, History of hypertension, HIV positive
- 685 (without AIDS), Alcoholism, Coronary artery disease, Rapidly fatal disease, Solid tumor, Liver
- 686 disease, Diabetes mellitus, Moderate to severe kidney disease
- 687 • Acute signs and symptoms: altered mental status, acute hypoxemic respiratory failure, liver
- 688 function tests, renal function, coagulation studies, chest imaging results
- 689 • Sequential Organ Failure Assessment (SOFA)<sup>33</sup> at enrollment
- 690 • Chronic use of medication: corticosteroids, ACE inhibitors, angiotensin receptor blockers, non-
- 691 steroids anti-inflammatory drugs, other
- 692 • Receipt of open label antivirals between hospital presentation and enrollment: chloroquine,
- 693 hydroxychloroquine, remdesivir, lopinavir/ritonavir, other
- 694 • Receipt of open label immunomodulators between hospital presentation and enrollment:
- 695 corticosteroids, tocilizumab, sarilumab, interferon  $\beta$ , other
- 696 • Receipt of convalescent plasma between hospital presentation and enrollment
- 697 • Receipt of azithromycin between hospital presentation and enrollment
- 698 • Receipt of invasive mechanical ventilation, non-invasive ventilation, high-flow nasal cannula,
- 699 vasopressors, and oxygen therapy at enrollment
- 700 • Highest fraction of inspired oxygen, lowest arterial oxygen saturation, highest respiratory rate,
- 701 lowest systolic blood pressure, highest heart rate in the 12 hours prior to enrollment
- 702 • Diagnosis of Acute Respiratory Distress Syndrome (ARDS) by Berlin Criteria<sup>33</sup> at enrollment
- 703 • COVID Ordinal Outcomes Scale at enrollment

## 704 **6.2 Assessments between Hospital Presentation and Hospital Discharge**

- 705 • Specimen type, date, and result of SARS-CoV-2 testing conducted clinically
- 706 • Specimen type, date, and result of viral testing conducted clinically
- 707 • Specimen type, date, and result of bacterial testing conducted clinically
- 708 • Date and time of study drug administration and reason for missed doses
- 709 • COVID Ordinal Outcomes Scale on Days 2, 3, 4, 5, 8, 15, and 29
- 710 • SOFA on Day 3
- 711 • S/F ratio on Day 3
- 712 • Receipt of open label antivirals between randomization and hospital discharge: chloroquine,
- 713 hydroxychloroquine, remdesivir, lopinavir/ritonavir, other
- 714 • Receipt of open label immunomodulators between randomization and hospital discharge:
- 715 corticosteroids, tocilizumab, sarilumab, interferon  $\beta$ , other
- 716 • Receipt of convalescent plasma between hospital presentation and enrollment
- 717 • Receipt of azithromycin and other antibiotics between randomization and Day 8
- 718 • Clinically diagnosed deep vein thrombosis (DVT) or pulmonary embolism (PE) between hospital
- 719 presentation and hospital discharge.
- 720 • Date and time of first receipt of supplemental oxygen (if applicable)
- 721 • Date and time of final receipt of supplemental oxygen (if applicable)
- 722 • Date and time of first receipt of high flow nasal cannula (if applicable)



- 723 • Date and time of final receipt of high flow nasal cannula (if applicable)
- 724 • Date and time of first receipt of non-invasive ventilation (if applicable)
- 725 • Date and time of final receipt of non-invasive ventilation (if applicable)
- 726 • Date and time of first receipt of invasive mechanical ventilation (if applicable)
- 727 • Date and time of final receipt of invasive mechanical ventilation (if applicable)
- 728 • Date and time of first receipt of extracorporeal membrane oxygenation (if applicable)
- 729 • Date and time of final receipt of extracorporeal membrane oxygenation (if applicable)
- 730 • Date and time of first receipt of vasopressors (if applicable)
- 731 • Date and time of final receipt of vasopressor (if applicable)
- 732 • Date and time of first meeting the Berlin Diagnostic Criteria for ARDS<sup>33</sup> (if applicable)
- 733 • Date and time of first ICU admission (if applicable)
- 734 • Date and time of final ICU discharge (if applicable)
- 735 • Date and time of hospital discharge (if applicable)
- 736 • Date of death (if applicable)
- 737 • Safety Outcomes: seizure, atrial or ventricular arrhythmia, cardiomyopathy, cardiac arrest, aspartate
- 738 aminotransferase or alanine aminotransferase levels that are greater than twice the local upper limit
- 739 of normal, acute pancreatitis (defined by a clinically obtained lipase level above the local upper
- 740 limit of normal), stage II or greater acute kidney injury according to KDIGO criteria<sup>34</sup>, receipt of
- 741 new renal replacement therapy, symptomatic hypoglycemia, neutropenia, lymphopenia, anemia,
- 742 thrombocytopenia, or severe dermatologic reaction (e.g., Steven's Johnson Syndrome)
- 743 • Patient destination at discharge

## 744 **6.3 Assessments following Hospital Discharge**

### 745 6.3.1 Acute Care Follow-up

746 For participants discharged from the study hospital prior to the Day 8, Day 15 or Day 29 assessment, we  
 747 will perform these assessments via telephone follow-up. The Day 8 call window will be Day 8 through  
 748 14. The Day 15 call window will be Day 15 through 22. The Day 29 call window will be Day 29 through  
 749 36. During these telephone calls, we will interview the patient, LAR, or facility staff to assess:

- 750 • Number and reason for missed doses of study drug (only for those discharged prior to completing
- 751 study drug)
- 752 • Date of death (if applicable)
- 753 • ED visits, hospital readmissions, and use of supplemental oxygen after hospital discharge
- 754 • Non-laboratory safety outcomes after hospital discharge and adverse events
- 755 • Symptoms of acute respiratory infection
- 756 • COVID Ordinal Outcomes Scale

### 757 6.3.2 Long-term Follow-up

758 We will follow-up selected patients at 3, 6, and 12 months to assess vital status, cognition, basic and  
 759 instrumental activities of daily living, quality of life, employment status, physical disability, and  
 760 psychological distress (i.e., depression, post-traumatic stress disorder, etc.), place of residence, and  
 761 rehospitalizations. These assessments may occur by phone, in-person, or videoconferencing.

762 Follow-up procedures in ORCHID are further specified by the Outcomes Related to COVID-19 treated  
763 with Hydroxychloroquine among In-patients with symptomatic Disease – Brain Outcomes and  
764 Psychological Distress (ORCHID-BUD) ancillary study. In summary, ORCHID-BUD will perform a  
765 phone battery at 12-months to determine cognition, post-traumatic stress disorder, and depression. In  
766 order to determine incident cases of cognitive impairment, post-traumatic stress disorder, and depression,  
767 baseline data will be collected from the subject’s family member or friend or the subject him/herself.  
768 Details of ORCHID-BUD study procedures are described in **Appendix E**.

769

## 770 **7. STATISTICAL CONSIDERATIONS**

771

### 772 **7.1 Statistical Approach**

773 The primary analysis will be an intention-to-treat comparison of the Day 15 COVID Ordinal Outcome  
774 score between patients randomized to hydroxychloroquine versus placebo. This analysis will be  
775 conducted with a proportional odds model using the Day 15 COVID Ordinal Outcome score as the  
776 dependent variable, randomized group assignment as the primary independent variable, and the following  
777 co-variables: age, sex, baseline COVID Ordinal Outcome score, baseline SOFA score, and duration of  
778 acute respiratory infection symptoms prior to randomization. An odds ratio  $>1.0$  indicates more favorable  
779 outcomes with hydroxychloroquine on the COVID Ordinal Outcome scale, while an odds ratio  $<1.0$   
780 indicates more favorable outcomes with placebo.

781 Patients enrolled prior to implementation of protocol version 2.0 who did not have laboratory confirmed  
782 SARS-CoV-2 infection will be included in the primary intention to treat analysis. In addition to  
783 reporting data for the full trial population we will also report data separately for patients randomized in  
784 the ICU (who tend to be more severely ill) and those randomized outside the ICU (who tend to be less  
785 severely ill) as well as those with duration of symptoms  $\leq 5$  days prior to randomization and those with  $>5$   
786 days of symptoms prior to randomization.

787 The anticipated study size is about 510 patients. We calculated the sample size under the assumption that  
788 we would have an interim analysis after approximately each 102 patients. We calculated the standard  
789 error of the log(odds-ratio) statistic with 51 patients per arm based on data from a recently completed trial  
790 within the PETAL Network that enrolled patients early in the course of critical illness, the *Vitamin D to*  
791 *Improve Outcomes by Leveraging Early Treatment* (VIOLET) trial.<sup>35</sup> In the VIOLET trial at Day 15,  
792 11.5% of patients had died, 5.8% were on invasive mechanical ventilation, 22.9% remained in the  
793 hospital, and the remaining had been discharged from the hospital (Table 1). We used these outcomes in  
794 VIOLET to approximate Day 15 outcomes on the COVID Ordinal Outcome scale that we may observe in  
795 this trial.

| Patient Status                                       | Percentage of patients |
|------------------------------------------------------|------------------------|
| Dead                                                 | 11.5%                  |
| Invasive mechanical ventilation                      | 5.8%                   |
| Hospitalized, not on invasive mechanical ventilation | 21.9%                  |
| Discharged from the hospital                         | 60.8%                  |

796  
 797 We plan to use a Bayesian analysis of the evolving data which allows flexibility in the number and timing  
 798 of the interim analyses. If we determine there is >95% probability of the odds ratio being >1.0, the  
 799 DSMB should consider stopping the trial for efficacy. If we determine there is >90% probability that the  
 800 odds ratio is <1.1, the DSMB should consider stopping the trial for futility. If we determine there is >70%  
 801 probability that the odds ratio is <0.70, the DSMB should consider stopping the trial for harm. We will  
 802 use a prior odds ratio of 1.0 (equal chance of harm and benefit; mean log OR of 0.0) and a prior  
 803 distribution of the standard error for its log set at 0.352 for tests of efficacy and a non-informative prior  
 804 for tests of futility and harm. The results will be reported in a similar manner to those published by  
 805 Goligher et al.<sup>36</sup> One advantage of Bayesian analysis is that stopping guidelines are not binding and the  
 806 DSMB is charged with using judgement and data both internal and external to the trial to make any  
 807 irrevocable decision.

808  
 809 If the trial enrolls 510 participants, further enrollment will be paused until the DSMB reviews data on the  
 810 primary outcome from all enrolled participants; a decision to continue enrollment will be made by  
 811 NHLBI after reviewing DSMB recommendations while the investigators remain blinded.

812  
 813 We calculated probabilities that this trial would stop for efficacy or futility based on several fixed  
 814 scenarios assuming we had an interim analysis after each 102 patients. The probabilities for continuing,  
 815 stopping for efficacy, and stopping for futility based on a true odds ratio of 1.0 (no difference between the  
 816 hydroxychloroquine and placebo groups) and 1.8 (substantially better outcomes in the  
 817 hydroxychloroquine group) are show in Table 2 and Table 3.

818

| Table 2. Probabilities of continuing or stopping the trial before or at the time 510 patients analysed based on a true odds ratio of 1.0 and 1.8. |                                        |                                       |
|---------------------------------------------------------------------------------------------------------------------------------------------------|----------------------------------------|---------------------------------------|
|                                                                                                                                                   | <u>Odds Ratio = 1.0</u><br>Probability | <u>Odd Ratio = 1.8</u><br>Probability |
| Continue                                                                                                                                          | 0.556                                  | 0.057                                 |
| Stop for Efficacy                                                                                                                                 | 0.061                                  | 0.937                                 |
| Stop for Futility                                                                                                                                 | 0.383                                  | 0.007                                 |

| Table 3. Probabilities of continuing or stopping the trial on or before the $n^{\text{th}}$ interim analysis based on a true odds ratio of 1.0 and 1.8. |                  |                   |                   |                  |                   |                   |
|---------------------------------------------------------------------------------------------------------------------------------------------------------|------------------|-------------------|-------------------|------------------|-------------------|-------------------|
| Interim Analysis                                                                                                                                        | Odds Ratio = 1.0 |                   |                   | Odds Ratio = 1.8 |                   |                   |
|                                                                                                                                                         | Continue         | Stop for Efficacy | Stop for Futility | Continue         | Stop for Efficacy | Stop for Futility |
| 1                                                                                                                                                       | 0.844            | 0.006             | 0.150             | 0.840            | 0.154             | 0.006             |
| 2                                                                                                                                                       | 0.744            | 0.021             | 0.235             | 0.494            | 0.500             | 0.007             |
| 3                                                                                                                                                       | 0.667            | 0.036             | 0.297             | 0.254            | 0.740             | 0.007             |
| 4                                                                                                                                                       | 0.606            | 0.0509            | 0.344             | 0.122            | 0.871             | 0.007             |
| 5                                                                                                                                                       | 0.556            | 0.061             | 0.383             | 0.056            | 0.937             | 0.007             |

819  
 820 To illustrate frequentist properties of these tests, we plotted the p-values at each interim analysis where  
 821 the interim stopped for futility or efficacy or continued based on an odds ratio of 1.0 (Figure 1) and 1.8  
 822 (Figure 2)

823 FIGURE 1  
824

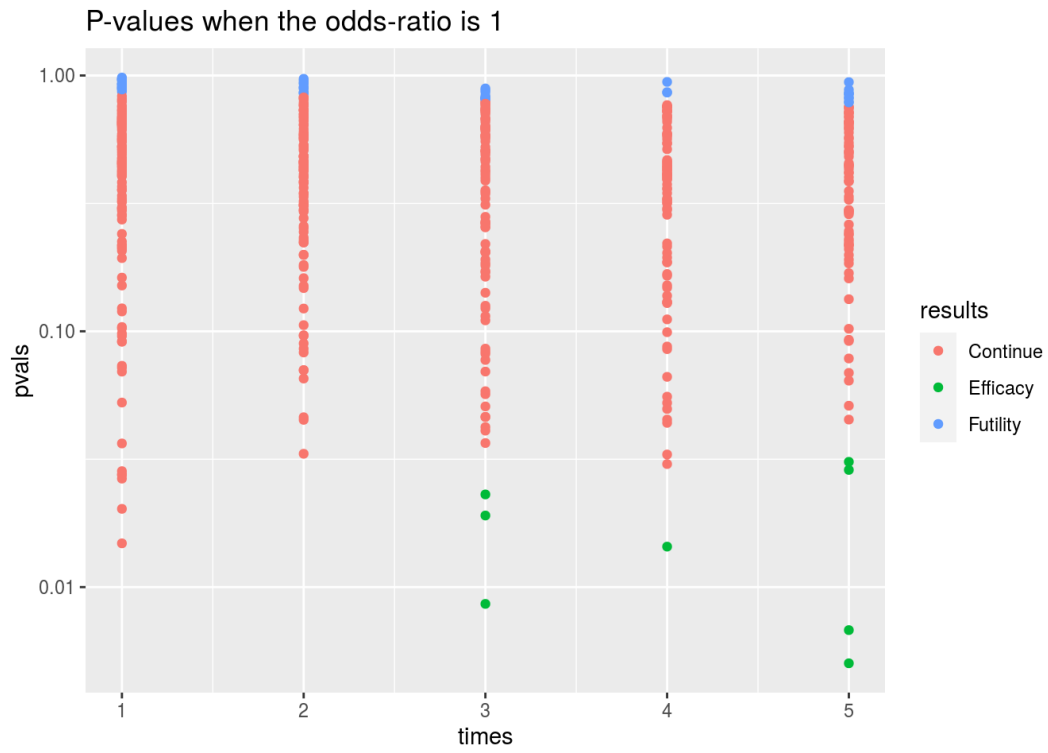

825  
826  
827 FIGURE 2  
828

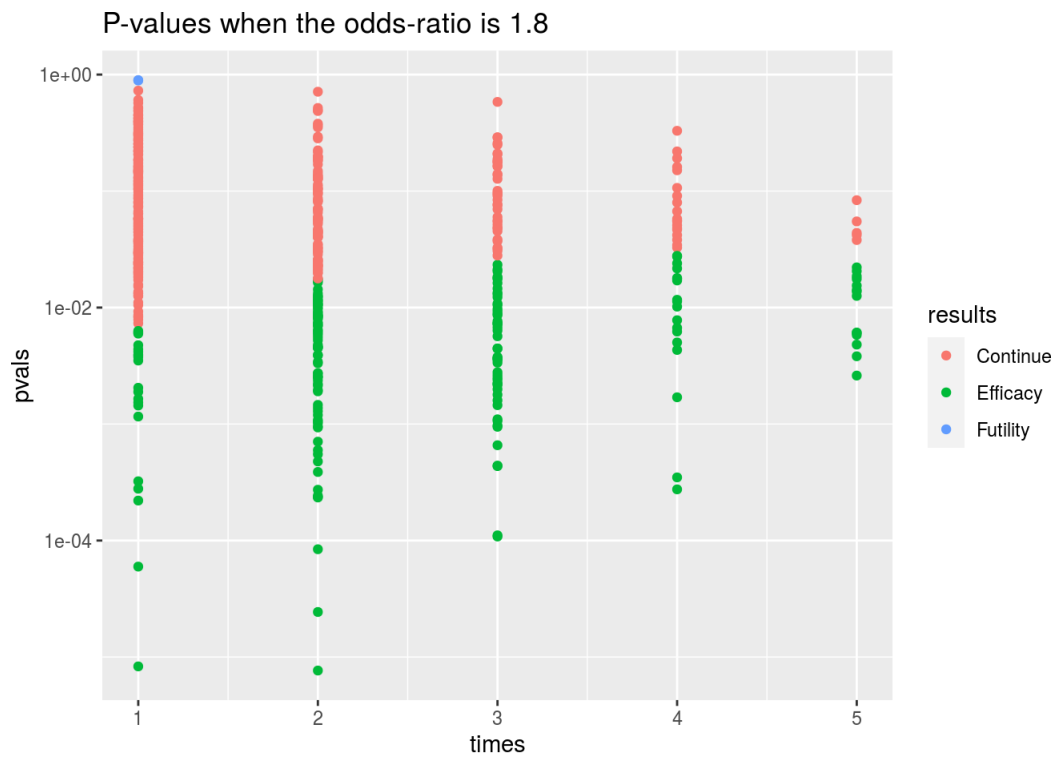

829

830 **7.2 Planned deviations from this design**

831 This trial is being conducted in a rapidly evolving pandemic of a novel disease. Thus, we have developed  
832 a statistical plan with flexibility to be modified based on results from other concurrently conducted trials  
833 and emerging data on the clinical epidemiology of COVID-19. The primary advantage of a Bayesian  
834 monitoring plan is that whenever the trial is stopped the inference only depends on the data and not the  
835 original statistical plan that was developed at a time when less was known about COVID-19 and  
836 potentially effective treatments.

837 We suspect multiple trials of hydroxychloroquine for COVID-19 will be conducted simultaneously. We  
838 will be receiving reports of completed studies and may be receiving interim reports of ongoing ones as  
839 well. We will incorporate this information using Bayesian methods, which allows us to calculate posterior  
840 probabilities that use this information.<sup>37</sup> This method weights the external data based on their relevance to  
841 the trial we are conducting. In addition, there may be reasons to continue this trial past the 510 patients  
842 initially planned. For instance, if the trial reaches the 510 patient interim analysis, the posterior  
843 probabilities indicate a reasonable chance of efficacy, and the question of hydroxychloroquine’s efficacy  
844 is still relevant, the current design can be continued with the same stopping rules.

845

846 **8. DATA QUALITY MONITORING AND STORAGE**

847 **8.1 Data Quality Monitoring**

848 Data quality will be reviewed remotely using front-end range and logic checks at the time of data entry  
849 and back-end monitoring of data using application programming interface tools connecting the online  
850 database to statistical software to generate data reports. Patient records and case report forms will also be  
851 examined by site personnel for a randomly selected 5-10% sample to evaluate the accuracy and  
852 completeness of the data entered into the database and monitor for protocol compliance. The  
853 coordinating center will perform remote monitoring of each study site to examine the completeness and  
854 accuracy of informed consent documents for study participants, documentation of eligibility criteria, and  
855 the completeness of study outcome collection.

856 **8.2 Data Storage**

857 Data will be entered into a secure online database. All data will be maintained in the secure online  
858 database until the time of study publication. At the time of publication, a de-identified version of the  
859 database will be generated.

860

861 **9. RISK ASSESSMENT**

862 **9.1 Potential Risk to Participants**

863 Although hydroxychloroquine is an FDA approved medication with an established safety profile  
864 (described as “among the safest medications used for the treatment of systematic rheumatic disease”),<sup>38</sup>

865 potential risks exist to participating in this study of hydroxychloroquine versus placebo for the treatment  
866 of COVID-19.

### 867 **9.1.1 Potential risks of receiving hydroxychloroquine**

868 Potential risks of receiving hydroxychloroquine can be classified based on their severity as Major or  
869 Minor. Major potential risks of receiving hydroxychloroquine include:

- 870 1) Neurological System
  - 871 a) Seizure – Hydroxychloroquine can lower the seizure threshold and co-administration of  
872 hydroxychloroquine with other medications known to lower the seizure threshold has been  
873 reported to increase the risk of seizures. This trial protocol excludes patients with a seizure  
874 disorder.
  - 875 b) Psychosis – A small number of case reports describe psychosis in patients on long-term treatment  
876 with hydroxychloroquine,<sup>39</sup> but has not been described with short-term treatment.
  - 877 c) Suicidal behavior - Suicidal behavior has been rarely reported in patients on long-term treatment  
878 with hydroxychloroquine for rheumatologic disorders,<sup>40</sup> but not with short-term therapy.
- 879 2) Circulatory system
  - 880 a) Cardiac arrhythmias
    - 881 i) Ventricular arrhythmias and torsades de pointes – Hydroxychloroquine can prolong the QT  
882 interval and ventricular arrhythmias and torsades de points have been reported in patients  
883 taking hydroxychloroquine. This trial protocol excludes patients with a prolonged QTc on  
884 baseline EKG and history of prolonged QTc syndromes, assesses the QTc after receipt of  
885 study drug, monitors daily for co-administration of medications that prolong the QTc and  
886 specifies criteria for stopping the study drug based on prolonged QTc.
    - 887 ii) Cardiomyopathy, sick sinus syndrome, atrioventricular block, or bundle branch block –  
888 Cardiomyopathy and conduction system disease have rarely been reported among patients on  
889 long-term hydroxychloroquine,<sup>41</sup> but have not been reported among patients receiving less  
890 than 3 months of therapy.
  - 891 3) Digestive system
    - 892 a) Liver injury – Fulminant hepatic failure has been reported in at least two cases from long-term  
893 administration of hydroxychloroquine.<sup>42</sup> Porphyria cutanea tarda appears to be a risk factor for  
894 liver injury from hydroxychloroquine. This trial protocol excludes patients with porphyria  
895 cutanea tarda.
    - 896 b) Increased cyclosporine or digoxin levels – hydroxychloroquine can increase levels of  
897 cyclosporine or digoxin for patients being co-administered these medications. This trial protocol  
898 monitors daily for receipt of medications that interact with hydroxychloroquine and notifies  
899 treating clinicians about potential medication interactions.
  - 900 4) Endocrine system
    - 901 a) Symptomatic hypoglycemia – hydroxychloroquine can increase risk of hypoglycemia, especially  
902 when co-administered with antidiabetic agents, although this is rarely observed in clinical  
903 practice.<sup>43</sup>
  - 904 5) Integumentary system
    - 905 a) Severe dermatologic reactions – A mild dermatologic reaction occurs in approximately 10 percent  
906 of patients treated with hydroxychloroquine, but severe dermatologic reactions such as Steven’s

907 Johnson Syndrome or Toxic Epidermal Necrolysis are rare. For example, in one recent case  
908 series of patients on hydroxychloroquine with dermatologic reactions, none of the reported  
909 reactions were severe.<sup>44</sup>

910 6) Hematological system

911 a) Neutropenic, leukopenia, anemia, thrombocytopenia – Rare toxicities of hydroxychloroquine  
912 include agranulocytosis<sup>45</sup> and aplastic anemia, but there has never been a report of this occurring  
913 with hydroxychloroquine in doses less than 7 mg/kg/day or during short-term use.

914 Minor potential risks of receiving hydroxychloroquine include: retinopathy or corneal deposits (with  
915 months-to-years of therapy); vertigo, tinnitus, or deafness; headache; light-headedness; insomnia; tremor  
916 or dyskinesia; peripheral neuropathy (with months-to-years of therapy); nausea, vomiting, or diarrhea;  
917 mild dermatologic reaction; and muscle weakness (with months-to-years of therapy).

918 **9.1.2 Potential risks of receiving placebo with COVID-19**

919 One potential risk to participating in this study is receiving placebo rather than hydroxychloroquine. This  
920 risk is only relevant if hydroxychloroquine is ultimately found to be an effective therapy for COVID-19  
921 and is not relevant if hydroxychloroquine is ultimately found to be an ineffective therapy for COVID-19.  
922 This trial protocol minimizes this risk through rigorous design to minimize the number of patients who  
923 must be enrolled to determine whether hydroxychloroquine is an effective therapy for COVID-19,  
924 excluding patients who decline to participate because they feel their optimal care requires  
925 hydroxychloroquine, excluding patients whose treating clinicians declines to allow enrollment because  
926 they feel the patient's optimal care requires treatment with hydroxychloroquine, and specifying  
927 procedures for stopping the study drug, unblinding, and allowing open-label administration of  
928 hydroxychloroquine for patients who experience clinical deterioration during the study period.

929 **9.1.3 Potential risks of receiving an EKG.**

930 EKGs are a safe, noninvasive, painless test and have no major risks. Patients may develop a mild rash or  
931 skin irritation where the electrodes were attached. If any paste or gel was used to attach the electrodes,  
932 patients may have an allergic reaction to it. This irritation usually goes away once the patches are  
933 removed, without requiring treatment.

934 **9.2 Minimization of Risk**

935 Federal regulations at 45 CFR 46.111(a)(1) require that risks to participants are minimized by using  
936 procedures which are consistent with sound research design. This trial protocol incorporates numerous  
937 design elements to minimize risk to patients that meet this human subject protection requirement.  
938 Hydroxychloroquine has been approved by the Food and Drug Administration and has been used in  
939 clinical practice for decades in a number of patient populations with an established safety profile. The  
940 dose and route of administration of hydroxychloroquine in this trial are comparable to the dose and route  
941 of administration approved for the treatment of other acute infections, such as malaria. The duration of  
942 treatment in this trial of 5 days is significantly shorter than for treatment of rheumatologic conditions, for  
943 which the drug is frequently administered for multiple years. To further mitigate risk, we will exclude  
944 patients with specific risk factors for adverse events from hydroxychloroquine including patients with  
945 prolonged QTc, patients receiving medications that may interact with hydroxychloroquine to prolong the  
946 QTc, patients with seizure disorder, and patients with porphyria cutanea tarda. The trial protocol includes

947 on-study monitoring to minimize the risk to patients during therapy. This monitoring includes assessment  
948 of QTc after receipt of study drug with specific criteria at which the study drug would be stopped. This  
949 monitoring also includes both automated electronic health record and manual study personnel review for  
950 medications with potential interactions with hydroxychloroquine during the 5-day study period. The trial  
951 protocol includes monitoring of adverse events, clinical outcomes, and interim analyses by an  
952 independent data and safety monitoring board empowered to stop or modify the trial at any time.

### 953 **9.3 Potential Benefit**

954 Study participants may or may not receive any direct benefits from their participation in this study.  
955 Administration of hydroxychloroquine may improve clinical outcomes among adults hospitalized for  
956 COVID-19 infection.

### 957 **9.4 Risk in Relation to Anticipated Benefit**

958 Federal regulations at 45 CFR 46.111 (a)(2) require that “the risks to subjects are reasonable in relation to  
959 anticipated benefits, if any, to subjects, and the importance of the knowledge that may reasonably be  
960 expected to result.” Based on the preceding assessment of risks and potential benefits, the risks to subjects  
961 are reasonable in relation to anticipated benefits. Hydroxychloroquine has been used in clinical practice  
962 for decades and previously evaluated for the treatment of patients acutely ill from infection with  
963 substantial data to support its safety and potential efficacy.

964

## 965 **10. HUMAN SUBJECTS PROTECTIONS**

966 Each study participant or a LAR must sign and date an informed consent form. Approval of the central  
967 institutional review board will be required before any participant is entered into the study.

### 968 **10.1 Selection of Subjects**

969 Federal regulations at 45 CFR 46(a)(3) require the equitable selection of subjects. The emergency  
970 departments, hospital wards, and ICUs of participating sites will be screened to determine if any patient  
971 meets inclusion and exclusion criteria. Data that have been collected as part of the routine clinical care of  
972 the patient will be reviewed to determine eligibility. If any patient meets criteria for study enrollment,  
973 then the attending physician responsible for his or her care will be asked for permission to approach the  
974 patient or his or her LAR for informed consent. Study exclusion criteria neither unjustly exclude classes  
975 of individuals from participation in the research nor unjustly include classes of individuals for  
976 participation in the research. Hence, the recruitment of participants conforms to the principle of  
977 distributive justice.

### 978 **10.2 Justification of Including Vulnerable Subjects**

979 The present research aims to investigate the safety and efficacy of hydroxychloroquine for the treatment  
980 of patients with COVID-19 who are at high risk for respiratory failure and mortality. Due to the nature of  
981 this patient population, many of these patients will have impaired decision-making capabilities.  
982 Moreover, those with intact decision-making capacities probably have milder disease than those with  
983 impaired capacity. Therefore, the validity of the study and its generalizability to severely ill patients  
984 would be compromised by enrolling only those participants with retained decision-making capacity.



985 Hence, participants recruited for this trial are not being unfairly burdened with involvement in this  
986 research.

### 987 **10.3 Informed Consent**

988 Federal regulations 45 CFR 46.111(a)(5) require that informed consent will be sought from each patient  
989 or the patient's LAR. Study personnel obtaining informed consent are responsible for ensuring that the  
990 patient or LAR understands the risks and benefits of participating in the study, answering any questions  
991 the patient or LAR may have throughout the study and sharing any new information in a timely manner  
992 that may be relevant to the patient's or LAR's willingness to permit the patient's continued participation  
993 in the trial. The study personnel obtaining informed consent will make every effort to minimize coercion.  
994 All patients or their LARs will be informed of the objectives of the study and the potential risks. The  
995 informed consent document will be used to explain the risks and benefits of study participation to the  
996 patient or LAR in simple terms before the patient is entered into the study, and to confirm that the patient  
997 or LAR is satisfied with his or her understanding of the risks and benefits of participating in the study and  
998 desires to participate in the study. The investigator is responsible for ensuring that informed consent is  
999 given by each patient or LAR. This includes obtaining the appropriate signatures and dates on the  
1000 informed consent document prior to the performance of any protocol procedures including administration  
1001 of study agent.

1002 For additional details, see Section 3.

### 1003 **10.4 Continuing Consent**

1004 Patients for whom consent was initially obtained from a LAR, but who subsequently regain decision-  
1005 making capacity while in hospital will be approached for consent for continuing participation, including  
1006 continuance of data acquisition. The consent form signed by the LAR should reflect that such consent  
1007 should be obtained. The process for obtaining consent from these patients will be the same as that  
1008 outlined in section 3.

### 1009 **10.5 Withdrawal of Consent**

1010 Participating patients may withdraw or be withdrawn (by the LAR, treating physician, or investigator)  
1011 from the trial at any time without prejudice. Data recorded up to the point of withdrawal will be included  
1012 in the trial analysis, unless consent to use data has also been withdrawn. Withdrawal of consent prior to  
1013 receipt of study drug will constitute a screen-failure and will be recorded. Withdrawal of consent after  
1014 randomization and administration of one or more doses of study drug will lead to discontinuation of study  
1015 interventions but site staff will request access to medical records for data related to the trial.

### 1016 **10.6 Identification of Legally Authorized Representatives**

1017 Many of the patients approached for participation in this research protocol will have impaired decision-  
1018 making capacity due to critical illness and will not be able to provide informed consent. Accordingly,  
1019 informed consent will be sought from the patient's LAR.

1020 Regarding consent from the LAR, the existing federal research regulations ('the Common Rule') states at  
1021 45 CFR 46.116 that "no investigator may involve a human being as a subject in research...unless the  
1022 investigator has obtained the legally effective informed consent of the subject or the subject's legally

1023 authorized representative”; and defines at 45 CFR 46 102 (c) a LAR as “an individual or judicial or other  
1024 body authorized under applicable law to consent on behalf of a prospective subject to the subject’s  
1025 participation in the procedures(s) involved in the research.” The Office of Human Research Protections  
1026 (OHRP) defined examples of “applicable law” as being state statutes, regulations, case law, or formal  
1027 opinion of a State Attorney General that addresses the issue of surrogate consent to medical procedures.  
1028 Such “applicable law” could then be considered as empowering the LAR to provide consent for  
1029 participant participation in the research. Interpretation of “applicable law” may be state specific and will  
1030 be addressed by the central IRB.

1031 According to a previous President’s Bioethics Committee (National Bioethics Advisory Committee  
1032 (NBAC)), an investigator should accept a relative or friend of the potential participant who is recognized  
1033 as an LAR for purposes of clinical decision making under the law of the state where the research takes  
1034 place.<sup>46</sup> Finally, OHRP has stated in their determination letters that a surrogate could serve as a LAR for  
1035 research decision making if such an individual is authorized under applicable state law to provide consent  
1036 for the “procedures” involved in the research study

### 1037 **10.7 Justification of Surrogate Consent**

1038 According to the Belmont Report, respect for persons incorporates at least two ethical convictions; first,  
1039 that individuals should be treated as autonomous agents, and second, that persons with diminished  
1040 autonomy are entitled to protection. One method that serves to protect patients is restrictions on the  
1041 participation of patients in research that presents greater than minimal risk. Commentators and research  
1042 ethics commissions have held the view that it is permissible to include incapable participants in greater  
1043 than minimal risk research as long as there is the potential for beneficial effects and that the research  
1044 presents a balance of risks and expected direct benefits similar to that available in the clinical setting.<sup>47</sup>  
1045 Several U.S. task forces have deemed it permissible to include incapable participants in research. For  
1046 example, the American College of Physicians’ document allows surrogates to consent to research  
1047 involving incapable participants only “if the net additional risks of participation are not substantially  
1048 greater than the risks of standard treatment”.<sup>48</sup> Finally, NBAC stated that an IRB may approve a protocol  
1049 that presents greater than minimal risk but offers the prospect of direct medical benefits to the participant,  
1050 provided that “the potential subject’s LAR gives permission...”.<sup>46</sup>

1051 Consistent with the above ethical sensibilities regarding the participation of decisionally incapable  
1052 participant in research and the previous assessment of risks and benefits in the previous section, the  
1053 present trial presents a balance of risks and potential direct benefits that is similar to that available in the  
1054 clinical setting.

### 1055 **10.8 Additional Safeguards for Vulnerable Participants**

1056 The present research will involve participants who might be vulnerable to coercion or undue influence. As  
1057 required in 45CFR46.111(b), we recommend that sites utilize additional safeguards to protect the rights  
1058 and welfare of these participants. Such safeguards might include but are not limited to: a) assessment of  
1059 the potential participant’s capacity to provide informed consent, and b) the availability of the LAR to  
1060 monitor the participant’s subsequent participation and withdrawal from the study. The specific nature of  
1061 the additional safeguards will be left to the discretion of the central IRB, in conjunction with the sites.

1062 **10.9 Confidentiality**

1063 Federal regulations at 45 CFR 46 111 (a) (7) requires that when appropriate, there are adequate provisions  
1064 to protect the privacy of participants and to maintain the confidentiality of data. At no time during the  
1065 course of this study, its analysis, or its publication will patient identities be revealed in any manner. The  
1066 minimum necessary data containing patient or provider identities will be collected. All patients will be  
1067 assigned a unique study ID number for tracking. All data collected for this study will be entered directly  
1068 into a secure online database. All data will be maintained in the secure online database until the time of  
1069 study publication. At the time of publication, a de-identified version of the database will be generated.  
1070 Further, tools within the secure online database will be used so that only the coordinating center and  
1071 investigators from the enrolling site will have access to data from participants enrolled at that site.

1072

1073 **11. ADVERSE EVENTS**

1074

1075 Assuring patient safety is an essential component of this protocol. Hydroxychloroquine has been  
1076 approved by the Food and Drug Administration and used in clinical practice for decades with an  
1077 established safety profile. Use of hydroxychloroquine for the treatment of acute respiratory infection due  
1078 to COVID-19, however, raises unique safety considerations. This protocol addresses these considerations  
1079 through:

- 1080 1. Exclusion criteria designed to prevent enrollment of patients likely to experience adverse events with  
1081 receipt of hydroxychloroquine;
- 1082 2. Proactive education of treating clinicians regarding medication interactions relevant to use of  
1083 hydroxychloroquine in the inpatient setting;
- 1084 3. On-study monitoring of co-interventions (e.g., medications) and patient characteristics (e.g., EKG) to  
1085 intervene before adverse events occur;
- 1086 4. Systematic collection of safety outcomes relevant to use of hydroxychloroquine in this setting;
- 1087 5. Structured reporting of adverse events

1088 **11.1 Adverse Event Definitions**

1089 **Adverse Event:** Any untoward medical occurrence associated with the use of a drug or a study  
1090 procedure, whether or not considered drug related.

1091 **Serious Adverse Event:** A serious adverse event is any adverse event that results in one of the outcomes  
1092 listed in section 11.3 below.

1093 **Adverse Reaction:** An adverse reaction means any adverse event caused by a study intervention. An  
1094 adverse reaction is a subset of all suspected adverse events where there is a reason to conclude that the  
1095 study intervention caused the event.

1096 **Suspected Adverse Reaction:** Any adverse event for which there is a reasonable possibility that the  
1097 study procedures caused the adverse event. Reasonable possibility means there is evidence to suggest a

1098 causal relationship between the study procedures and the adverse event. A suspected adverse reaction  
1099 implies a lesser degree of certainty about causality than adverse reaction.

1100 **Suspected Unexpected Serious Adverse Reaction (SUSAR):** An adverse reaction that is both  
1101 unexpected (not consistent with risks outlined in the study protocol or investigator brochure), serious, and  
1102 meets the definition of a suspected adverse reaction.

## 1103 **11.2 Safety Monitoring**

1104 Assuring patient safety is an essential component of this protocol. Each participating investigator has  
1105 primary responsibility for the safety of the individual participants under his or her care. The Investigators  
1106 will determine daily if any adverse events occur during the period from enrollment through **study day 7**  
1107 (48 hours after completion of the study drug) or hospital discharge, whichever occurs first and will  
1108 determine if such adverse events are reportable. Thereafter, adverse events are not required to be reported  
1109 unless the investigator feels the adverse event was related to study drug or study procedures.

1110 The following adverse events will be considered reportable and thus collected in the adverse event case  
1111 report forms:

- 1112 ■ Serious adverse events
- 1113 ■ Non-serious adverse events that are considered by the investigator to be related to study  
1114 procedures or of uncertain relationship (Appendix C)
- 1115 ■ Events leading to permanent discontinuation of study drug

1116 Study-specific clinical outcomes (Primary, Secondary and Safety Outcomes and Assessments  
1117 During the Study), including serious outcomes such as organ failures and death, are  
1118 systematically recorded in the case report forms and are exempt from adverse event reporting  
1119 unless the investigator deems the event to be related to the administration of study drug or the  
1120 conduct of study procedures (or of uncertain relationship) as outlined in Appendix C.

1121 After randomization, adverse events must be evaluated by the investigator. If the adverse event is judged  
1122 to be reportable, as outlined above, then the investigator will report to the CCC their assessment of the  
1123 potential relatedness of each adverse event to the study drug or protocol procedure via electronic data  
1124 entry. Investigators will assess if there is a reasonable possibility that the study procedure caused the  
1125 event, based on the criteria outlined in Appendix C. Investigators will also consider if the event is  
1126 unexpected. Unexpected adverse events are events not listed in the study protocol and the investigator  
1127 brochure for Hydroxychloroquine. Investigators will also determine if adverse events are unanticipated  
1128 given the patient's clinical course, previous medical conditions, and concomitant medications.

1129 If a patient's treatment is discontinued as a result of an adverse event, study site personnel must also  
1130 report the circumstances and data leading to discontinuation of treatment in the adverse event case report  
1131 forms.

## 1132 **11.3 Serious Adverse Events**

1133 Serious adverse event collection begins after randomization and study procedures have been initiated. If a  
1134 patient experiences a serious adverse event after consent, but prior to randomization or starting study  
1135 procedures, the event will NOT be collected. Study site personnel must alert the CCC of any **serious and**

1136 **study procedure related** adverse event within 24 hours of investigator awareness of the event. Alerts  
1137 issued via telephone are to be immediately followed with official notification on the adverse event case  
1138 report form. See Appendix C for reporting timelines for serious, unexpected, study related events (SAEs)  
1139 and serious, unexpected suspected adverse reactions (SUSARs)

1140 As per the FDA and NIH definitions, a serious adverse event is any adverse event that results in one of  
1141 the following outcomes:

- 1142     ▪ Death
- 1143     ▪ A life-threatening experience (that is, immediate risk of dying)
- 1144     ▪ Prolonged inpatient hospitalization or re-hospitalization

1145 As per <http://www.fda.gov/Safety/MedWatch/HowToReport/ucm053087.htm>: Report if admission  
1146 to the hospital or prolongation of hospitalization was a result of the adverse event. Emergency room  
1147 visits that do not result in admission to the hospital should be evaluated for one of the other serious  
1148 outcomes (e.g., life-threatening; required intervention to prevent permanent impairment or damage;  
1149 other serious medically important event).

- 1150     ▪ Persistent or significant disability/incapacity

1151 As per <http://www.fda.gov/Safety/MedWatch/HowToReport/ucm053087.htm>: Report if the adverse  
1152 event resulted in a substantial disruption of a person's ability to conduct normal life functions, i.e.,  
1153 the adverse event resulted in a significant, persistent or permanent change, impairment, damage or  
1154 disruption in the patient's body function/structure, physical activities and/or quality of life.

1155 Reportable serious adverse events that may not result in death, be life-threatening, or require  
1156 hospitalization may be considered serious adverse events when, based upon appropriate medical  
1157 judgment, they may jeopardize the patient and may require medical or surgical intervention to prevent one  
1158 of the outcomes listed in this definition.

1159 Serious adverse events will be collected during the first **7 study days** or until hospital discharge,  
1160 whichever occurs first, regardless of the investigator's opinion of causation.

1161

## 1162 **12. Data and Safety Monitoring Board (DSMB)**

1163 The principal role of the DSMB is to assure the safety of participants in the trial. They will regularly  
1164 monitor data from this trial, review and assess the performance of its operations, and make  
1165 recommendations to the steering committee and NHLBI with respect to:

- 1166     • Review of adverse events
- 1167     • Interim results of the study for evidence of efficacy or adverse events
- 1168     • Possible early termination of the trial because of new external information, early attainment of  
1169         study objectives, safety concerns, or inadequate performance
- 1170     • Possible modifications in the clinical trial protocol
- 1171     • Performance of individual centers

1172 The NHLBI PETAL Network DSMB is appointed by the Director of the NHLBI and makes  
1173 recommendations to the Director. The DSMB reviews all protocols for safety following review by an

1174 independent NHLBI Protocol Review Committee. The DSMB will consist of members with expertise in  
1175 acute lung injury, emergency medicine, biostatistics, ethics, and clinical trials. An NHLBI staff member  
1176 not associated with PETAL will serve as Executive Secretary. Appointment of all members is contingent  
1177 upon the absence of any conflicts of interest. All the members of the DSMB are voting members. The  
1178 Principal Investigator and the Medical Monitor of the CCC will be responsible for the preparation of all  
1179 DSMB and adverse event reports and may review unblinded data. The DSMB will develop a charter and  
1180 review the protocol and sample consent form during its first meeting. Subsequent DSMB meetings will be  
1181 scheduled in accordance with the DSMB Charter with the assistance of the CCC. When appropriate,  
1182 conference calls may be held in place of face-to-face meetings. Recommendations to end, modify, or  
1183 continue the trial will be prepared by the DSMB executive secretary for review by the NHLBI Director.  
1184 Recommendations for major changes, such as stopping the trial, will be reviewed by the NHLBI Director  
1185 and communicated immediately. Other recommendations will be reviewed by the NHLBI director and  
1186 distributed in writing to the CCC, which will distribute to the PETAL steering committee with  
1187 instructions for reporting to local IRBs when appropriate.

1188 Details of the NHLBI policies regarding DSMBs can be found at the following URL:

1189 [https://www.nhlbi.nih.gov/grants-and-training/policies-and-guidelines/nhlbi-policy-data-and-safety-](https://www.nhlbi.nih.gov/grants-and-training/policies-and-guidelines/nhlbi-policy-data-and-safety-monitoring-extramural-clinical-studies)  
1190 [monitoring-extramural-clinical-studies](https://www.nhlbi.nih.gov/grants-and-training/policies-and-guidelines/nhlbi-policy-data-and-safety-monitoring-extramural-clinical-studies)

1191

1192

1193 **13. REFERENCES**

1194

- 1195 1. Del Rio C, Malani PN. COVID-19-New Insights on a Rapidly Changing Epidemic. *JAMA* 2020;
- 1196 2. Fauci AS, Lane HC, Redfield RR. Covid-19 - Navigating the Uncharted. *N Engl J Med* 2020;
- 1197 3. Cao B, Wang Y, Wen D, et al. A Trial of Lopinavir-Ritonavir in Adults Hospitalized with Severe  
1198 Covid-19. *N Engl J Med* 2020;
- 1199 4. Wang M, Cao R, Zhang L, et al. Remdesivir and chloroquine effectively inhibit the recently  
1200 emerged novel coronavirus (2019-nCoV) in vitro. *Cell Res* 2020;30(3):269–71.
- 1201 5. Yao X, Ye F, Zhang M, et al. In Vitro Antiviral Activity and Projection of Optimized Dosing  
1202 Design of Hydroxychloroquine for the Treatment of Severe Acute Respiratory Syndrome  
1203 Coronavirus 2 (SARS-CoV-2). *Clin Infect Dis Off Publ Infect Dis Soc Am* 2020;
- 1204 6. World Health Organization (WHO). WHO R&D Blueprint: informal consultation on prioritization  
1205 of candidate therapeutic agents for use in novel coronavirus 2019 infection, Geneva, Switzerland,  
1206 24 January 2020. [Internet]. [cited 2020 Mar 19];Available from:  
1207 <https://apps.who.int/iris/handle/10665/330680>
- 1208 7. Li Q, Guan X, Wu P, et al. Early Transmission Dynamics in Wuhan, China, of Novel Coronavirus-  
1209 Infected Pneumonia. *N Engl J Med* 2020;
- 1210 8. Zhu N, Zhang D, Wang W, et al. A Novel Coronavirus from Patients with Pneumonia in China,  
1211 2019. *N Engl J Med* 2020;382(8):727–33.
- 1212 9. Perlman S. Another Decade, Another Coronavirus. *N Engl J Med* 2020;382(8):760–2.
- 1213 10. Su S, Wong G, Shi W, et al. Epidemiology, Genetic Recombination, and Pathogenesis of  
1214 Coronaviruses. *Trends Microbiol* 2016;24(6):490–502.
- 1215 11. Cui J, Li F, Shi Z-L. Origin and evolution of pathogenic coronaviruses. *Nat Rev Microbiol*  
1216 2019;17(3):181–92.
- 1217 12. Discovery of a novel coronavirus associated with the recent pneumonia outbreak in humans and its  
1218 potential bat origin | bioRxiv [Internet]. [cited 2020 Mar 18];Available from: [https://www-biorxiv-  
1219 org.proxy.library.vanderbilt.edu/content/10.1101/2020.01.22.914952v2.abstract](https://www-biorxiv-org.proxy.library.vanderbilt.edu/content/10.1101/2020.01.22.914952v2.abstract)
- 1220 13. Cheng PK, Wong DA, Tong LK, et al. Viral shedding patterns of coronavirus in patients with  
1221 probable severe acute respiratory syndrome. *The Lancet* 2004;363(9422):1699–700.
- 1222 14. Hui DS, Azhar EI, Kim Y-J, Memish ZA, Oh M, Zumla A. Middle East respiratory syndrome  
1223 coronavirus: risk factors and determinants of primary, household, and nosocomial transmission.  
1224 *Lancet Infect Dis* 2018;18(8):e217–27.
- 1225 15. Wang Y, Liu Y, Liu L, Xang X, Luo N, Ling L. Clinical outcome of 55 asymptomatic cases at the  
1226 time of hospital admission infected with SARS-Coronavirus-2 in Shenzhen, China. *J Infect Dis*  
1227 2020;

- 1228 16. Wu C, Chen X, Cai Y, et al. Risk Factors Associated With Acute Respiratory Distress Syndrome  
1229 and Death in Patients With Coronavirus Disease 2019 Pneumonia in Wuhan, China. *JAMA Intern*  
1230 *Med* 2020;
- 1231 17. Arentz M, Yim E, Klaff L, et al. Characteristics and Outcomes of 21 Critically Ill Patients With  
1232 COVID-19 in Washington State. *JAMA* [Internet] 2020 [cited 2020 Mar 19];(Published Online).  
1233 Available from: [https://jamanetwork-](https://jamanetwork-com.proxy.library.vanderbilt.edu/journals/jama/fullarticle/2763485)  
1234 [com.proxy.library.vanderbilt.edu/journals/jama/fullarticle/2763485](https://jamanetwork-com.proxy.library.vanderbilt.edu/journals/jama/fullarticle/2763485)
- 1235 18. Wilson N, Kvalsig A, Telfar-Barnard L, Baker M. Case-fatality estimates for COVID-19 calculated  
1236 by using a lag time for fatality. *Emerg Infect Dis* [Internet] 2020 [cited 2020 Mar 18];26(6).  
1237 Available from: [https://wwwnc.cdc.gov/eid/article/26/6/20-0320\\_article](https://wwwnc.cdc.gov/eid/article/26/6/20-0320_article)
- 1238 19. DrugBank. Hydroxychloroquine. [Internet]. [cited 2020 Mar 19];Available from:  
1239 <https://www.drugbank.ca/drugs/DB01611>
- 1240 20. Al-Bari MAA. Targeting endosomal acidification by chloroquine analogs as a promising strategy  
1241 for the treatment of emerging viral diseases. *Pharmacol Res Perspect* 2017;5(1):e00293.
- 1242 21. Liu J, Cao R, Xu M, et al. Hydroxychloroquine, a less toxic derivative of chloroquine, is effective in  
1243 inhibiting SARS-CoV-2 infection in vitro. *Cell Discov* 2020;6(1):1–4.
- 1244 22. Colson P, Rolain J-M, Lagier J-C, Brouqui P, Raoult D. Chloroquine and hydroxychloroquine as  
1245 available weapons to fight COVID-19. *Int J Antimicrob Agents* 2020;105932.
- 1246 23. Lauer SA, Grantz KH, Bi Q, et al. The Incubation Period of Coronavirus Disease 2019 (COVID-19)  
1247 From Publicly Reported Confirmed Cases: Estimation and Application. *Ann Intern Med* [Internet]  
1248 2020 [cited 2020 Mar 19];Available from: [https://annals.org/aim/fullarticle/2762808/incubation-](https://annals.org/aim/fullarticle/2762808/incubation-period-coronavirus-disease-2019-covid-19-from-publicly-reported)  
1249 [period-coronavirus-disease-2019-covid-19-from-publicly-reported](https://annals.org/aim/fullarticle/2762808/incubation-period-coronavirus-disease-2019-covid-19-from-publicly-reported)
- 1250 24. Wang D, Hu B, Hu C, et al. Clinical Characteristics of 138 Hospitalized Patients With 2019 Novel  
1251 Coronavirus–Infected Pneumonia in Wuhan, China. *JAMA* 2020;323(11):1061–9.
- 1252 25. Cao J, Hu X, Cheng W, Yu L, Tu W-J, Liu Q. Clinical features and short-term outcomes of 18  
1253 patients with corona virus disease 2019 in intensive care unit. *Intensive Care Med* [Internet] 2020  
1254 [cited 2020 Mar 20];Available from: <https://doi.org/10.1007/s00134-020-05987-7>
- 1255 26. Baden L, Rubin E. Covid-19 — The Search for Effective Therapy. *NEJM* [Internet] 2020 [cited  
1256 2020 Mar 19];Published Online. Available from: [https://www-nejm-](https://www-nejm-org.proxy.library.vanderbilt.edu/doi/full/10.1056/NEJMe2005477)  
1257 [org.proxy.library.vanderbilt.edu/doi/full/10.1056/NEJMe2005477](https://www-nejm-org.proxy.library.vanderbilt.edu/doi/full/10.1056/NEJMe2005477)
- 1258 27. Gao J, Tian Z, Yang X. Breakthrough: Chloroquine phosphate has shown apparent efficacy in  
1259 treatment of COVID-19 associated pneumonia in clinical studies. *Biosci Trends* 2020;14(1):72–3.
- 1260 28. Paton NI, Goodall RL, Dunn DT, et al. Effects of hydroxychloroquine on immune activation and  
1261 disease progression among HIV-infected patients not receiving antiretroviral therapy: a randomized  
1262 controlled trial. *JAMA* 2012;308(4):353–61.
- 1263 29. Roques P, Thiberville S-D, Dupuis-Maguiraga L, et al. Paradoxical Effect of Chloroquine  
1264 Treatment in Enhancing Chikungunya Virus Infection. *Viruses* 2018;10(5).



- 1265 30. Guan W, Ni Z, Hu Y, et al. Clinical Characteristics of Coronavirus Disease 2019 in China. *N Engl J*  
1266 *Med* 2020;0(0):null.
- 1267 31. Wang Y, Fan G, Salam A, et al. Comparative effectiveness of combined favipiravir and oseltamivir  
1268 therapy versus oseltamivir monotherapy in critically ill patients with influenza virus infection. *J*  
1269 *Infect Dis* 2019;
- 1270 32. WHO | Coronavirus disease (COVID-2019) R&D [Internet]. WHO. [cited 2020 Mar 18]; Available  
1271 from: <http://www.who.int/blueprint/priority-diseases/key-action/novel-coronavirus/en/>
- 1272 33. ARDS Definition Task Force, Ranieri VM, Rubenfeld GD, et al. Acute respiratory distress  
1273 syndrome: the Berlin Definition. *JAMA* 2012;307(23):2526–33.
- 1274 34. Kidney Disease Improving Global Outcomes. KDIGO clinical practice guideline for acute kidney  
1275 injury. *Kidney Int* 2012;2: Suppl:1–138.
- 1276 35. National Heart, Lung, and Blood Institute PETAL Clinical Trials Network, Ginde AA, Brower RG,  
1277 et al. Early High-Dose Vitamin D3 for Critically Ill, Vitamin D-Deficient Patients. *N Engl J Med*  
1278 2019;
- 1279 36. Goligher EC, Tomlinson G, Hajage D, et al. Extracorporeal Membrane Oxygenation for Severe  
1280 Acute Respiratory Distress Syndrome and Posterior Probability of Mortality Benefit in a Post Hoc  
1281 Bayesian Analysis of a Randomized Clinical Trial. *JAMA* 2018;320(21):2251–9.
- 1282 37. Schoenfeld DA, Hui Zheng, Finkelstein DM. Bayesian design using adult data to augment pediatric  
1283 trials. *Clin Trials Lond Engl* 2009;6(4):297–304.
- 1284 38. Felson DT, Anderson JJ, Meenan RF. The comparative efficacy and toxicity of second-line drugs in  
1285 rheumatoid arthritis. Results of two metaanalyses. *Arthritis Rheum* 1990;33(10):1449–61.
- 1286 39. Manzo C, Gareri P, Castagna A. Psychomotor Agitation Following Treatment with  
1287 Hydroxychloroquine. *Drug Saf - Case Rep* 2017;4(1):6.
- 1288 40. Gonzalez-Nieto JA, Costa-Juan E. Psychiatric symptoms induced by hydroxychloroquine. *Lupus*  
1289 2015;24(3):339–40.
- 1290 41. Joyce E, Fabre A, Mahon N. Hydroxychloroquine cardiotoxicity presenting as a rapidly evolving  
1291 biventricular cardiomyopathy: key diagnostic features and literature review. *Eur Heart J Acute*  
1292 *Cardiovasc Care* 2013;2(1):77–83.
- 1293 42. Hydroxychloroquine [Internet]. In: *LiverTox: Clinical and Research Information on Drug-Induced*  
1294 *Liver Injury*. Bethesda (MD): National Institute of Diabetes and Digestive and Kidney Diseases;  
1295 2012 [cited 2020 Mar 21]. Available from: <http://www.ncbi.nlm.nih.gov/books/NBK548738/>
- 1296 43. Cansu DU, Korkmaz C. Hypoglycaemia induced by hydroxychloroquine in a non-diabetic patient  
1297 treated for RA. *Rheumatol Oxf Engl* 2008;47(3):378–9.
- 1298 44. Pelle MT, Callen JP. Adverse cutaneous reactions to hydroxychloroquine are more common in  
1299 patients with dermatomyositis than in patients with cutaneous lupus erythematosus. *Arch Dermatol*  
1300 2002;138(9):1231–3; discussion 1233.

- 1301 45. Sames E, Paterson H, Li C. Hydroxychloroquine-induced agranulocytosis in a patient with long-  
1302 term rheumatoid arthritis. *Eur J Rheumatol* 2016;3(2):91–2.
- 1303 46. National Bioethics Advisory Committee (NBAC). *Research Involving Persons with Mental*  
1304 *Disorders That May Affect Decision making Capacity*. U.S. Government Printing Office; 1998.
- 1305 47. Dresser R. *Research Involving Persons with Mental Disabilities: A Review of Policy Issues and*  
1306 *Proposals*. Rockville: U.S. Government Printing Office; 1998.
- 1307 48. Cognitively impaired subjects. American College of Physicians. *Ann Intern Med*  
1308 1989;111(10):843–8.

1309

1310

1311

1312 **14. APPENDICES**

1313 **Appendix A. Schedule of Events**

| Study Activity                               | Pre-Enrollment | Day 1 | Day 2          | Day 3          | Day 4          | Day 5          | Day 8          | Day 15         | Day 29         | 3 Months       | 6 Months       | 12 Months      |
|----------------------------------------------|----------------|-------|----------------|----------------|----------------|----------------|----------------|----------------|----------------|----------------|----------------|----------------|
| Eligibility assessment                       | X              |       |                |                |                |                |                |                |                |                |                |                |
| EKG                                          | X              |       | X <sup>a</sup> |                |                |                |                |                |                |                |                |                |
| Pregnancy test (if applicable)               | X              |       |                |                |                |                |                |                |                |                |                |                |
| Informed consent                             | X              |       |                |                |                |                |                |                |                |                |                |                |
| Demographic and baseline variable collection |                | X     |                |                |                |                |                |                |                |                |                |                |
| Randomization                                |                | X     |                |                |                |                |                |                |                |                |                |                |
| Study drug delivery                          |                | X     | X              | X              | X              | X              |                |                |                |                |                |                |
| Assessment for study drug adherence          |                | X     | X <sup>a</sup> | X <sup>a</sup> | X <sup>a</sup> | X <sup>a</sup> | X <sup>b</sup> |                |                |                |                |                |
| Safety monitoring for adverse events         |                | X     | X <sup>a</sup> | X <sup>a</sup> | X <sup>a</sup> | X <sup>a</sup> | X <sup>b</sup> | X <sup>b</sup> | X <sup>b</sup> |                |                |                |
| Assessment of COVID ordinal outcome score    | X              |       | X <sup>a</sup> | X <sup>a</sup> | X <sup>a</sup> | X <sup>a</sup> | X <sup>b</sup> | X <sup>b</sup> | X <sup>b</sup> |                |                |                |
| Mortality assessment                         |                |       |                |                |                |                |                | X <sup>b</sup> | X <sup>b</sup> |                |                |                |
| 28-day in-hospital outcomes (chart review)   |                |       |                |                |                |                |                |                | X              |                |                |                |
| Long-term outcomes                           |                |       |                |                |                |                |                |                |                | X <sup>c</sup> | X <sup>c</sup> | X <sup>c</sup> |

1314

1315 a. Assessed only if patient remains hospitalized.

1316 b. Assessed by telephone follow-up if the patient has been discharged.

1317 c. Assessed in selected patients in-person, or by telephone or videophone.

1318

1319 **Appendix B. Potential medication interactions with hydroxychloroquine**

1320 A. Medications considered contraindicated, which if ordered on an inpatient during the 5-day study  
1321 period will prompt study personnel to discuss with treating clinicians whether stopping the study  
1322 drug is appropriate or if this medication cannot be stopped or substituted: amiodarone;  
1323 chloroquine; cimetidine; dofetilide; phenobarbital; phenytoin; sotalol.

1324  
1325 B. Medications considered to present a potential interaction with hydroxychloroquine, which if  
1326 ordered on an inpatient during the 5-day study period, will prompt study personnel to discuss with  
1327 treating clinicians the risk-benefit assessment of this medication and potential need for additional  
1328 monitoring: ampicillin, antacids, cyclosporine, digoxin, flecainide, mefloquine, methotrexate,  
1329 mexilitine, rifampicin, rifapentine.

1330

1331 **Appendix C: Adverse Event Reporting and Unanticipated Events**

1332 As noted in section 11, investigators will report all “serious adverse events,” defined as adverse events  
1333 that are serious and have a reasonable possibility that the event was due to a study drug or procedure (or  
1334 of uncertain relatedness), to the CCC within 24 hours. The CCC will then notify the NHLBI and Central  
1335 Institutional Review Board (cIRB).

1336 The Medical Monitor at the CCC will work collaboratively with the reporting investigator to determine if  
1337 a serious adverse event has a reasonable possibility of having been caused by the study drug or study  
1338 procedure, as outlined in 21 CFR 312.32(a)(1), and below. The Medical Monitor will be unblinded and  
1339 will also determine if the event is unexpected for hydroxychloroquine. An adverse is considered  
1340 “unexpected” if it is not listed in the investigator brochure or the study protocol (21 CFR 312.32(a)). If a  
1341 determination is made that a serious adverse event has a reasonable possibility of having been caused by a  
1342 study procedure or the study drug, it will be classified as a suspected adverse reaction. If the suspected  
1343 adverse reaction is unexpected, it will be classified as a serious unexpected suspected adverse reaction  
1344 (SUSAR).

1345 The CCC will report all unexpected deaths, serious and treatment related adverse events, and SUSARs to  
1346 the DSMB, NHLBI, and cIRB within 7 days after receipt of the report from a clinical site. A written  
1347 report will be sent to the NHLBI, DSMB, FDA, and the cIRB within 15 calendar days. The DSMB will  
1348 also review all reported adverse events and clinical outcomes during scheduled interim analyses. The  
1349 CCC will distribute the written summary of the DSMB’s periodic review of reported adverse events to the  
1350 cIRB in accordance with NIH guidelines (<http://grants.nih.gov/grants/guide/notice-files/not99-107.html>).  
1351 The Medical Monitor will provide to Sandoz Pharmacovigilance any significant safety findings (without  
1352 disclosing protected health information) during the conduct of the trial.

1353

1354 **C.1. Unanticipated Problems (UP)**

1355 Investigators must also report Unanticipated Problems, regardless of severity, associated with study  
1356 procedures within 24 hours. An unanticipated problem is defined as follows: any incident, experience, or  
1357 outcome that meets all of the following criteria:

- 1358 • Unexpected, in terms of nature, severity, or frequency, given the research procedures that are  
1359 described in the protocol-related documents, such as the IRB-approved research protocol and  
1360 informed consent document; and the characteristics of the subject population being studied;
- 1361 • Related or possibly related to participation in the research, in this guidance document, possibly  
1362 related means there is a reasonable possibility that the incident, experience, or outcome may have  
1363 been caused by the procedures involved in the research;
- 1364 • Suggests that the research places subjects or others at a greater risk of harm (including physical,  
1365 psychological, economic, or social harm) than was previously known or recognized.

1366

1367 **C.2. Determining Relationship of Adverse Events to Study Drug or Study Procedures**

1368 Investigators will be asked to grade the strength of the relationship of an adverse event to study drug or  
1369 study procedures as follows:

- 1370 • Definitely Related: The event follows: a) A reasonable, temporal sequence from a study  
1371 procedure; and b) Cannot be explained by the known characteristics of the patient’s clinical state  
1372 or other therapies; and c) Evaluation of the patient’s clinical state indicates to the investigator that  
1373 the experience is definitely related to study procedures.
- 1374 • Probably or Possibly Related: The event should be assessed following the same criteria for  
1375 “Definitely Associated”. If in the investigator’s opinion at least one or more of the criteria are not  
1376 present, then “probably” or “possibly” associated should be selected.
- 1377 • Probably Not Related: The event occurred while the patient was on the study but can reasonably  
1378 be explained by the known characteristics of the patient’s clinical state or other therapies.
- 1379 • Definitely Not Related: The event is definitely produced by the patient’s clinical state or by other  
1380 modes of therapy administered to the patient.
- 1381 • Uncertain Relationship: The event does not meet any of the criteria previously outlined.

### 1382 **C.3. Clinical Outcomes that may be Exempt from Adverse Event Reporting**

1383 Study-specific outcomes of acute respiratory infection, COVID-19, and critical illness will be  
1384 systematically collected for all patients in both study group and are exempt from adverse event  
1385 reporting unless the investigator considers the event to be Definitely or Possibly Related (or of an  
1386 Uncertain Relationship) to the study drug or study procedures. Examples of study-specific clinical  
1387 outcomes include:

- 1388 • Death not related to the study procedures
- 1389 • Neurological events
  - 1390 ○ Seizure
- 1391 • Cardiovascular events
  - 1392 ○ Receipt of vasopressors
  - 1393 ○ Atrial or ventricular arrhythmia
  - 1394 ○ Cardiac arrest
- 1395 • Respiratory events
  - 1396 ○ Hypoxemia requiring supplemental oxygen
  - 1397 ○ Acute respiratory distress syndrome
  - 1398 ○ Receipt of mechanical ventilation
  - 1399 ○ Receipt of extra-corporeal membrane oxygenation
- 1400 • Gastrointestinal events
  - 1401 ○ Elevation of aspartate aminotransferase or alanine aminotransferase
  - 1402 ○ Acute pancreatitis
- 1403 • Renal events
  - 1404 ○ Acute kidney injury
  - 1405 ○ Receipt of renal replacement therapy
- 1406 • Endocrine events
  - 1407 ○ Symptomatic hypoglycemia
- 1408 • Hematologic or coagulation events
  - 1409 ○ Neutropenia, lymphopenia, anemia, or thrombocytopenia
- 1410 • Dermatologic events
  - 1411 ○ Severe dermatologic reaction (e.g., Steven’s Johnson Syndrome)

1412 Note: A study-specific clinical outcome may also qualify as a reportable adverse event. For example, a  
1413 ventricular arrhythmia that the investigator considers Definitely or Possibly Related to the study drug  
1414 would be both recorded as a study-specific clinical outcome and reported as a Serious and Definitely or  
1415 Possibly Related Adverse Event.

1416

1417 **C.4. Decision tree for determining if an adverse event is reportable**

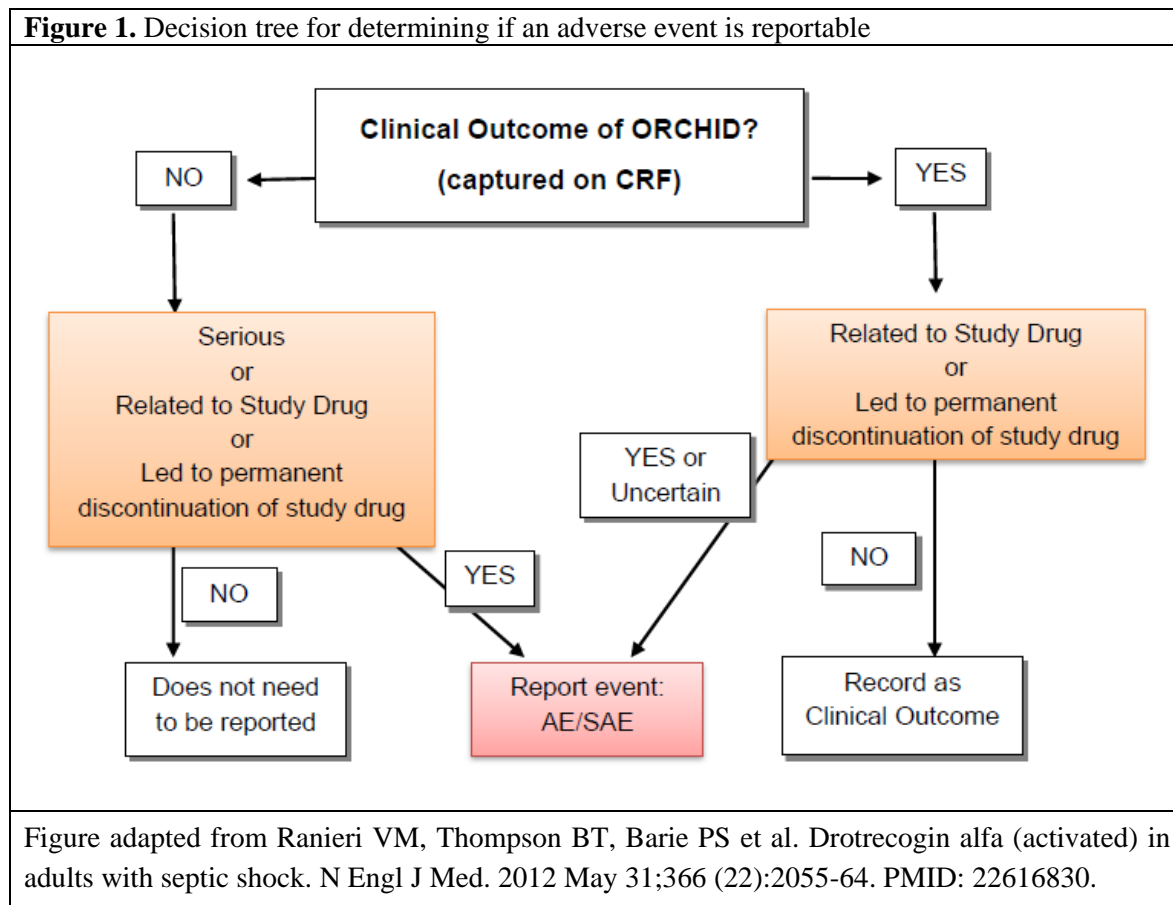

1418

1419

1420

1421 **Appendix D. Public Readiness and Emergency Preparedness Act**

1422 This study is being conducted to determine whether hydroxychloroquine can safely and effectively be  
1423 used to mitigate, treat, or cure COVID-19 or limit the harm of the COVID-19 pandemic in accordance  
1424 with the Secretary of the Department of Health and Human Services' (HHS's) Declaration under the  
1425 Public Readiness and Emergency Preparedness Act for medical countermeasures against COVID-19  
1426 (COVID-19 Declaration) effective February 4, 2020. The purpose of this study is to test if  
1427 hydroxychloroquine results in clinical benefit in patients hospitalized with COVID- 19.

1428 Hydroxychloroquine has been approved by the FDA for other uses and its investigational use for COVID-  
1429 19 in this study has been exempted by the FDA from investigational new drug application requirements  
1430 pursuant to 21 CFR 312.2(b)(1). This study is conducted under a Research Project Cooperative  
1431 Agreement with the National Heart, Lung, and Blood Institute.

1432



1433 **Appendix E: ORCHID-BUD Ancillary Study Protocol**

- 1434 1. **Title:** Outcomes Related to COVID-19 treated with Hydroxychloroquine among In-patients with  
 1435 symptomatic Disease – Brain Outcomes and Psychological Distress (**ORCHID-BUD**)
- 1436 2. **Objective:**
- 1437 • Aim 1: To determine (a) the epidemiology (i.e., prevalence) of cognitive impairment (i.e.,  
 1438 acquired-Alzheimer’s Disease and Related Dementia [ADRD]) characterized by impairments in  
 1439 memory, attention, language, reasoning, and executive function at 12-months in adults  
 1440 hospitalized with COVID-19 infection, and (b) if hydroxychloroquine administration is  
 1441 associated with improvement in these same outcomes.
  - 1442 • Aim 2: To determine (a) the epidemiology of post-traumatic stress disorder (PTSD) and  
 1443 depression at 12-months in adults who are hospitalized with COVID-19 infection, and (b) if  
 1444 hydroxychloroquine administration is associated with improvement in these same outcomes.
  - 1445 • Aim 3: To identify modifiable risk factors (e.g., sedatives, isolation, intravenous fluids,  
 1446 antibiotics, pressor, angiotensin-converting enzyme [ACE]-inhibitor or angiotensin II receptor  
 1447 blocker [ARB] use, etc.) associated with worse long-term cognitive impairment, PTSD, and  
 1448 depression at 12 months in adults hospitalized with COVID-19 infection.
- 1449 3. **Hypothesis:** The primary hypothesis of this proposal is that (a) COVID-19 survivors will have a high  
 1450 burden of ADRD, PTSD, and depression. The secondary hypothesis is that hydroxychloroquine will  
 1451 lower the burden of these three outcomes as compared to placebo.
- 1452 4. **Study Design:** ORCHID-BUD will assess 12-month cognition, PTSD, and depression using a  
 1453 comprehensive phone battery in all patients enrolled in ORCHID since the beginning of the study  
 1454 (March 2020). ORCHID-BUD essentially expands and better defines the ORCHID’s follow-up study  
 1455 procedures that are already described its study protocol (ORCHID protocol Version 1.1, Section  
 1456 6.3.2, and page 22):“We will follow-up selected patients at 3, 6, and 12 months to assess vital status,  
 1457 cognition, basic and instrumental activities of daily living, quality of life, employment status, physical  
 1458 disability, and psychological distress (i.e., depression, post-traumatic stress disorder, etc.), place of  
 1459 residence, and rehospitalizations. These assessments may occur by phone, in-person, or  
 1460 videoconferencing.” In anticipation of ORCHID-BUD, the ORCHID parent study has already added  
 1461 language to the informed consent document to conduct the proposed study procedures, including the  
 1462 baseline phone interview with the patient and family member:

| Study Procedure 6: Follow-up Phone Calls |                                                                                                                                                                                                                                                                                                                                                                                                                                                                                                                                                                                                                                                                                                                                                                                                                           |
|------------------------------------------|---------------------------------------------------------------------------------------------------------------------------------------------------------------------------------------------------------------------------------------------------------------------------------------------------------------------------------------------------------------------------------------------------------------------------------------------------------------------------------------------------------------------------------------------------------------------------------------------------------------------------------------------------------------------------------------------------------------------------------------------------------------------------------------------------------------------------|
| <b>Timing</b>                            | Around Day 7, Day 15, and Day 28 if you have been discharged from the hospital before those times.                                                                                                                                                                                                                                                                                                                                                                                                                                                                                                                                                                                                                                                                                                                        |
|                                          | <b><u>Long-term Follow-up</u></b><br>3, 6, and 12 months                                                                                                                                                                                                                                                                                                                                                                                                                                                                                                                                                                                                                                                                                                                                                                  |
| <b>Explanation</b>                       | A study team member will call you and/or a family member for follow-up information about how you are doing and if you have had any problems that might be due to the study medication. We may also contact you at 3, 6, and 12 months to see how you are doing. We may ask you do some tasks to see how your brain is working. For example, we may ask you to repeat a list of numbers or name many words that start with the letter “P”. We may also ask you questions about your health, ability to do common daily activities, employment status, quality of life, and how you are feeling. These assessments may be done over the phone, in-person, or videoconferencing. <b>We will confidentially and securely</b> collect your medical record number and personal information, so we can stay in contact with you. |
| <b>Risks or Discomforts</b>              | You may find the phone calls and questions inconvenient.                                                                                                                                                                                                                                                                                                                                                                                                                                                                                                                                                                                                                                                                                                                                                                  |

1476 Therefore, the ORCHID-BUD study activities will be considered part of the ORCHID parent study  
1477 activities, and separate informed consent will not be performed.

1478 **5. Study procedures:**

1479 **5.1 Baseline data collection study procedures**

1480 For ORCHID-BUD, we will contact the surrogate approximately 3-months (+/- 2 months)  
1481 after hospital discharge in order to establish baseline cognition, PTSD, and depression. We  
1482 will contact the surrogate listed on ORCHID by their preferred method of contact (phone,  
1483 text message, or e-mail).

1484 For the family member, we will administer the short form Informant Questionnaire on  
1485 Cognitive Decline in the Elderly (IQCODE) establish the subject's baseline cognition; this  
1486 16-item questionnaire takes less than 5 minutes to complete. We will also ask the surrogate if  
1487 they thought the patient was more confused than usual during hospitalization. We will also  
1488 conduct the FAM-CAM and SQiD, which are informant-based delirium assessments, to  
1489 further characterize delirium during hospitalization. We will ask them to estimate the number  
1490 of days they felt the patient was confused. We will also ask if they (or any family members)  
1491 were able to visit the patient in person, by phone, or by mobile device. We will also ask them  
1492 to estimate the number of days the subject was hospitalized for and if applicable, duration of  
1493 ICU length of stay and mechanical ventilation. We will also ask if the surrogate whether or  
1494 not the subject has baseline dementia, PTSD, or depression. We will also ask about the  
1495 subject's race, ethnicity, age, level of education, highest occupation, and region of residence.  
1496 These data will be obtained over the phone, but the family member will have the option to  
1497 complete the surveys via an online REDCap survey if preferred.

1498 If no surrogate is listed for ORCHID, we will contact the patient by their preferred method of  
1499 contact (phone, text message, or e-mail). If the surrogate is available, we obtain the  
1500 surrogate's contact information. For the patient, we will administer the IQCODE and ask if  
1501 they have baseline dementia, PTSD, or depression. We will also ask if they were on  
1502 cholinesterase inhibitors before they were hospitalized for COVID-19. We will also ask their  
1503 race, ethnicity, age, level of education, highest occupation, and region of residence. We will  
1504 ask patients some questions about their hospitalization. We will also ask how long they were  
1505 hospitalized, how long were they in the ICU, and how long they were mechanically  
1506 ventilated. These questions may be answered by their family member or caregiver if  
1507 requested. We will also ask patients if they felt confused, disoriented, or had hallucinations  
1508 during hospitalization. We will ask them to estimate the number of days during the  
1509 hospitalization they felt they had these symptoms. We will also ask how much contact family  
1510 and friends had with the patient during hospitalization and if the contact was in person, by  
1511 video conferencing, or by phone. We will also ask about the subject's race, ethnicity, age,  
1512 level of education, highest occupation, and region of residence. These data will be obtained  
1513 over the phone, but the subject will have the option to complete the surveys via an online  
1514 REDCap survey if preferred.

1515 After the conversation has concluded, we will let them know that we will contact them  
1516 approximately 12-months (+/- 3 months) after randomization to assess their cognition and  
1517 psychological well-being using a phone battery. We will also let them know that we will give  
1518 them a gift card after they complete the 12-month phone call.

1519 **5.2 Twelve-month study procedures**

1520 The CIBS Center will then contact enroll subjects at approximately 12-months (+/- 3 months). We  
1521 will perform the phone battery as described in the **Primary Endpoints (Section 10) and Secondary**  
1522 **Endpoints (Section 11)** section. Any data not obtained during the baseline phone call will be  
1523 obtained during the 12-month phone call to minimize missing data. After the 12-month follow-up is  
1524 completed, patients will be given a gift card.

1525 It is possible that ORCHID-BUD patients will be co-enrolled with other PETAL network COVID-19  
1526 trials (e.g., BLUE CORAL) who are conducting long-term follow-ups. We may coordinate with the  
1527 University of Washington and University of Michigan study teams to streamline data collection and  
1528 minimize overburdening the patient.

1529 **5.3 Medical Record Review**

1530 We will use electronic medical records, in whatever institutions make this this available, to obtain  
1531 detailed data regarding these potentially modifiable risk factors. Specifically, we will evaluate how  
1532 modifiable risk factors such as the use of sedative medications and oxygen therapy, mechanical  
1533 ventilation settings, social isolation, ventilator weaning protocols, intravenous fluid administration,  
1534 antibiotics, medications such as ACE-inhibitors, ARBs, antacids, and pressors affect the 12-month  
1535 outcomes.

1536 **6. Risks:** Because ORCHID-BUD is only adding a comprehensive phone battery at 12-months, its risks  
1537 are minimal:

1538 **6.1 Fatigue or distress:** For ORCHID-BUD specifically, subjects will undergo a comprehensive phone  
1539 battery at 12-months that can take up to 45 to 60 minutes to perform. There is a small risk that the  
1540 patient may become fatigued or distressed during the study's cognitive assessments.

1541 **6.2 Confidentiality:** Because patient identifiers are accessed throughout all phases of the study, there is a  
1542 small risk of loss of patient confidentiality.

1543 **7. Inclusion Criteria:** ; All patients enrolled in ORCHID will be included.

1544 **8. Exclusion Criteria:** ORCHID-BUD will exclude patients who are:

- 1545 (1) non-English or non-Spanish speaking,
- 1546 (2) deaf, or
- 1547 (3) non-verbal or unable to follow simple commands prior to the COVID-19 illness.

1548 We will exclude non-English and Non-Spanish speaking patients because our neuropsychological  
1549 raters can only provide their assessments in these languages. We will also exclude patients who are  
1550 non-verbal or unable to follow simple commands prior to the COVID-19 illness to exclude patients  
1551 with end-stage dementia.

1552 **9. Randomization and Study Initiation Time Window:** The ORCHID-BUD ancillary study will enroll  
 1553 patients from ORCHID parent study. ORCHID-BUD study activities will the subject and/or  
 1554 surrogates approximately one to three months after ORCHID randomization. At approximately 12-  
 1555 months (+/- 3 months) after randomization, we will call the patients and conduct the phone battery to  
 1556 assess cognition, PTSD, and depression.

1557 **10. Primary Endpoint**

|                      | Assessment                                         | Domain                       | Description                                                                                                                                                                                       |
|----------------------|----------------------------------------------------|------------------------------|---------------------------------------------------------------------------------------------------------------------------------------------------------------------------------------------------|
| <b>Cognition</b>     | Telephone Montreal Cognitive Assessment            | Global Cognition             | Measure of global cognition and assesses attention concentration, memory, language, conceptual thinking, calculations, and orientation.                                                           |
|                      | WAIS-IV Digit Span <sup>3</sup>                    | Attention                    | Subject repeats a string of numbers forwards, backwards, and ascending order                                                                                                                      |
|                      | Hayling test <sup>4</sup>                          | Executive Function           | It consists of two sets of 15 sentences; the examiner reads the questions aloud and subject completes the sentences                                                                               |
|                      | DKEFS Verbal Fluency <sup>5</sup>                  | Language                     | Subject is asked to name as many animals they can think of 60 seconds and as many words that begin with the letter “F”, “A”, and “S” over 60 seconds                                              |
|                      | Paragraph Recall - Immediate <sup>6</sup>          | Immediate Memory             | Subject is read a paragraph and then recalls the paragraph immediately                                                                                                                            |
|                      | Paragraph Recall - Delayed <sup>6</sup>            | Delayed Memory               | Subject recalls the paragraph memorized from the immediate memory task 15 to 20 minutes later                                                                                                     |
|                      | WAIS-IV Similarities <sup>3</sup>                  | Reasoning/Verbal Abstraction | Subject is given two words and then is asked how they are alike                                                                                                                                   |
|                      | DKEFS Proverbs <sup>5</sup>                        | Reasoning/Verbal Abstraction | Subject is asked to interpret 5 proverbs                                                                                                                                                          |
| <b>Psychological</b> | Hospital Anxiety and Depression Scale <sup>7</sup> | Depression                   | Multiple-choice inventory that is used for measuring the severity of depression                                                                                                                   |
|                      | PTSD Checklist for the DSM-V (PCL-5) <sup>8</sup>  | PTSD                         | Multiple-choice questions reflecting DSM-IV symptoms of PTSD. Subjects with a score of > 35 will receive a formal assessment performed over the phone by a clinical psychologist using the CAPS-5 |

**Table 1.** Telephone Battery to assess cognitive, psychological, and functional outcomes. WAIS-IV, Wechsler Adult Intelligence Scale-IV; DKEFS, Delis–Kaplan Executive Function System; PTSD, Post-Traumatic Stress Disorder; Clinician Administered PTSD Scale for the DSM-5 (CAPS-5).

1558 **11. Secondary Endpoint:** We will also record 12-month mortality and place of residence. We will  
 1559 also ask the number of times the patient was re-hospitalized since the index hospitalization.

1560 **12. Sample Size / Interim Monitoring**

1561 All patients enrolled in the ORCHID parent study will be screened for ORCHID-BUD. ORCHID  
 1562 will enroll 460 patients who are hospitalized with COVID-19. We estimate that 70% will survive  
 1563 and of these, 93% will meet ORCHID-BUD’s eligibility criteria. We estimate that we will

1564 successfully complete the phone battery in 90% of eligible patients providing 270 patients for  
1565 ORCHID-BUD's analysis.

1566

1567 **Appendix E: References**

---

- 1568 1. Jorm AF. A short form of the Informant Questionnaire on Cognitive Decline in the Elderly  
1569 (IQCODE): development and cross-validation. *Psychol Med.* 1994;24:145-153.
- 1570 2. Steis MR, Evans L, Hirschman KB, et al. Screening for delirium using family caregivers:  
1571 convergent validity of the Family Confusion Assessment Method and interviewer-rated  
1572 Confusion Assessment Method. *J Am Geriatr Soc.* 2012;60:2121-2126.
- 1573 3. Wechsler D, Wechsler D. *The Wechsler-Bellevue intelligence scale.* New York, N.Y.,: The  
1574 Psychological corporation; 1946.
- 1575 4. Burgess PW, Shallice T. *The Hayling and Brixton Test Manual.* San Antonio (TX): Pearson  
1576 Education; 1997.
- 1577 5. DC D, C K, JH K. *Delis-Kaplan Executive Function System (D-KEFS): Examiner's manual.* San  
1578 Antonio: Psychological Corporation; 2001.
- 1579 6. Wechsler D. *Wechsler Memory Scale-IV.* Vol 4th. San Antonio: Pearson Education; 2009.
- 1580 7. Zigmond AS, Snaith RP. The hospital anxiety and depression scale. *Acta Psychiatr Scand.*  
1581 1983;67:361-370.
- 1582 8. Weathers FW, Litz BT, Keane TM, Palmieri PA, Marx BP, Schnurr PP. The PTSD Checklist for  
1583 DSM-5 (PCL-5). 2013; [www.ptsd.va.gov](http://www.ptsd.va.gov).

1584

1585

---
