# Supplementary material
Source: PubMed Central journal article supplement (PMC7653542)
Supplement: jama-e2022240-s004.pdf [file jama-e2022240-s004.pdf]

## Data Sharing Statement

### Data

**Data available:** Yes

**Data types:** Deidentified participant data

**How to access data:** BioLincc. <https://biolincc.nhlbi.nih.gov/home/>

**When available:** With publication

### Supporting Documents

**Document types:** None

### Additional Information

**Who can access the data:** researchers who propose work with the data

**Types of analyses:** any purpose

**Mechanisms of data availability:** after approval of a proposal

**Any additional restrictions:** n/a

Data from this trial will be shared via the National Heart, Lung, and Blood Institute (NHLBI) Biologic Specimen and Data Repository Information Coordinating Center (BioLINCC). BioLINCC can be accessed at <https://biolincc.nhlbi.nih.gov/home/>. Data will be available approximately 30 days after publication of the primary manuscript reporting trial results. Deidentified, patient-level data with a supporting data dictionary will be available.
